# Supplementary material for: Prefrontal-amygdalar oscillations related to social behavior in mice
Source: eLife. 2022 May 17;11:e78428. doi: 10.7554/eLife.78428 (PMC9113747; doi:10.7554/eLife.78428)
Supplement: Figure 1—source data 1. [file elife-78428-fig1-data1.xlsx]

## Sheet: main
Fig1B	no target	target	ratio	Fig1E,top	26.0447	18.4739	12.7191	15.9408	17.9307	13.1114	43.1639	16.9902	10.7074	34.6412	12.051	15.011	20.9475	32.4787	Fig1E,top	15.0609	15.1969	12.3021	16.822	17.8399	15.4734	11.3425	34.1582	10.6921	16.9892	12.0858	15.4428	18.3591	15.8591	Fig1F	4-7 Hz	30-60 Hz	Fig1G	4-7 Hz	30-60 Hz	Fig1H	4-7 Hz	30-60 Hz	Fig1I	Frequency (Hz)	dmPFCtoBLA
	84	96	1.14286	no target	12.9094	10.4129	11.1795	14.5408	12.8315	11.3541	13.8055	11.9349	12.4793	21.3358	12.4181	12.9482	18.6799	21.8723	target	10.6172	12.4003	11.3262	15.0966	12.4131	12.3232	9.45448	18.9781	12.2743	20.3995	12.6454	15.6512	19.0096	14.2979		104.179	98.6345		122.768	96.1147		105.813	105.421		0	0.0475542	0.155079	0.0945791	0.0335066	0.0204565
	29.3333	78.6667	2.68182		9.09705	7.49326	8.03634	10.576	9.61152	8.60093	8.24636	8.51503	8.81592	14.5248	9.35206	10.4963	13.5136	14.9144		7.87986	8.57342	9.60399	11.965	10.5438	10.2685	7.52257	13.2343	10.7268	13.8486	11.6971	12.5573	20.1127	13.4192		114.367	103.01		101.105	91.132		110.343	109.295		0.999001	0.0508129	0.154036	0.0954915	0.0413483	0.0290774
	44.3333	46.3333	1.04511		7.29453	5.94364	6.33633	7.88314	8.78537	7.40836	7.10208	7.22841	7.44915	9.309	8.13907	9.19591	12.6293	11.0868		7.24855	6.79051	6.49549	8.44241	8.65019	8.65086	5.93741	10.374	10.5039	11.4016	9.89862	10.4905	14.2591	12.3225		112.842	98.6168		101.429	102.56		107.347	101.731		1.998	0.059287	0.150667	0.0979103	0.061059	0.0488692
	59.6667	61.3333	1.02793		6.37391	4.88943	5.50471	7.87125	8.31765	9.67127	6.09415	7.00054	5.44245	8.29427	7.45859	7.54361	10.1364	11.0436		6.30607	6.0829	6.59828	8.09543	8.46068	9.11744	5.07519	9.12439	12.0662	10.8419	10.1447	10.4341	12.0126	12.3347		106.253	97.9846		109.613	91.2415		104.015	102.458		2.997	0.070589	0.145747	0.101148	0.085847	0.0772294
	97	130	1.34021		5.01952	4.53781	5.72146	6.76064	6.14273	7.98274	5.61078	6.68014	6.11096	8.33479	7.5719	7.64726	8.89541	10.0151		5.97677	5.15876	7.52783	7.77643	7.07565	7.20637	4.90519	8.58085	8.71747	9.95037	9.5127	10.4492	10.9599	11.6215		102.022	104.725		102.451	85.5598		115.314	92.4254		3.996	0.0821821	0.139563	0.104579	0.109855	0.104958
	15.6667	22.6667	1.44681		5.40317	4.35055	6.63618	6.96798	5.81262	6.61225	5.42189	7.4979	7.02122	10.2613	8.82514	8.91093	9.74068	9.8714		5.5666	4.52266	6.99057	7.01244	5.45947	5.81946	4.32268	7.75203	7.12043	10.1398	10.448	9.05168	9.64315	10.4347		97.2717	94.0331		109.39	98.7322		101.979	111.834		4.995	0.092959	0.132885	0.107844	0.130955	0.132539
	83.6667	106.667	1.2749		5.27587	4.0881	6.41174	7.03205	5.7006	5.16786	4.82094	7.42262	8.78866	11.559	10.8595	9.7565	9.76789	11.3816		5.07048	3.86193	6.32632	5.91536	5.61216	5.23411	4.09122	6.58035	7.37123	9.6975	9.68359	10.2512	8.69647	9.43164		84.9963	95.1763								5.99401	0.102148	0.126047	0.110806	0.148211	0.154409
	46	50.3333	1.0942		4.94841	3.65377	5.47557	6.38258	4.27864	3.98424	4.54624	5.87178	6.35173	9.69313	8.29811	8.81767	8.37718	9.7913		4.95793	3.85574	5.54439	5.7349	4.52074	4.39001	4.06539	6.25795	6.60386	8.80857	8.27851	9.22065	7.53747	9.50076		129.003	98.0114								6.99301	0.11	0.119491	0.113457	0.16236	0.175183
	60.3333	45.3333	0.751381		3.96255	3.07085	4.47323	5.9082	3.5345	3.61475	3.35482	4.62391	5.60761	9.39041	6.81618	6.46385	6.02728	8.29196		4.53266	3.52065	4.00363	5.03173	4.55565	3.94228	3.68236	5.03687	6.32576	7.66154	6.88148	7.2199	7.23865	7.27401		147.651	94.5898								7.99201	0.116412	0.11336	0.11584	0.173623	0.189828
	25	26	1.04		3.70339	2.51345	3.33791	4.77805	3.1218	3.71616	2.57086	3.83071	6.56463	7.96383	5.40375	4.60508	5.93893	5.59926		3.76768	2.97013	3.38885	4.20567	3.63084	3.40895	2.9814	4.15932	4.85486	5.36915	6.09375	5.05872	5.33782	5.43149		78.6507	82.4248								8.99101	0.12191	0.107819	0.118014	0.182967	0.204962
	90.6667	111	1.22426		3.02376	2.25794	2.63717	3.6133	3.09303	3.25095	2.6321	3.21201	4.02386	7.10541	3.46517	3.62351	4.04165	4.26305		2.94447	2.58899	2.7957	3.90503	3.22789	2.87161	2.40084	3.73607	3.85319	4.49342	4.03874	4.31401	4.61555	4.30951		125.022	98.4725								9.99001	0.126411	0.102862	0.120035	0.190513	0.214408
	47.3333	34.3333	0.725352		2.4958	2.09445	2.62772	3.40949	2.61678	3.10105	2.32168	3.05534	2.74363	4.82599	3.2902	3.58237	3.40822	4.10419		2.85719	2.25045	2.67602	3.13248	2.89254	3.01215	2.40386	3.39005	2.91962	3.91503	3.57414	3.99261	3.97756	3.78438		121.407	97.8554								10.989	0.130421	0.0985165	0.121954	0.197028	0.22591
	23	27.6667	1.2029		2.7617	2.16614	2.50821	3.08417	2.98844	2.96004	2.5298	2.86604	2.23948	5.17469	3.48093	3.04379	3.2837	4.01421		2.77332	2.19466	2.56623	3.25959	2.64177	2.88852	2.32366	3.2326	2.85047	3.68265	3.14411	3.79348	3.61617	3.79822		112.217	93.8347								11.988	0.133761	0.0947131	0.123808	0.202426	0.232047
	46.3333	86.3333	1.86331		2.57867	2.24426	2.65885	3.15884	2.66154	2.88247	2.29835	2.75334	2.30253	6.21207	2.78495	3.07734	3.14711	3.70257		2.73928	2.2002	2.65965	3.01404	2.5926	2.7287	2.18917	3.05982	2.7014	3.62678	3.24383	3.38592	3.59887	3.38921		111.309	99.5146								12.987	0.136895	0.0914365	0.125633	0.207328	0.241368
					2.53841	2.19683	2.52406	2.81672	2.63983	2.79986	2.54755	2.9826	2.30861	5.62828	2.94322	2.79871	2.94854	3.49153		2.80849	2.01497	2.63737	3.2376	2.61046	2.70735	2.33123	3.1191	2.56574	3.74561	3.0343	3.01585	3.28551	3.31768											13.986	0.139556	0.0886018	0.127452	0.211497	0.245458
					2.72501	2.06883	2.69229	3.21041	2.69369	2.87683	2.45169	2.91696	2.21256	4.79565	2.93491	3.01439	2.78599	3.32282		2.77374	1.94378	2.69431	3.00734	2.594	2.49624	2.18957	3.45654	2.61117	3.39621	2.99033	2.88386	3.2585	3.30911											14.985	0.142194	0.0861905	0.129289	0.215483	0.2535
					2.72331	2.1794	2.65862	2.91655	2.54394	2.5429	2.52444	3.22404	2.31411	4.77066	2.90384	3.2257	2.76817	3.24672		2.91081	2.12553	3.0167	3.16723	2.65474	2.58541	2.05694	3.18657	2.55652	3.25755	3.07757	3.08912	2.97351	3.35048											15.984	0.144472	0.084122	0.131159	0.218952	0.256331
					2.73969	2.10456	2.62698	2.7916	2.63955	2.61958	2.34072	3.25061	2.29827	5.19859	2.58658	2.96634	2.8242	2.98591		2.91671	2.14622	2.69513	3.21074	2.54518	2.57447	2.26466	3.23895	2.35867	3.37219	2.84732	3.17522	2.77266	2.88461											16.983	0.146845	0.0823868	0.133078	0.222429	0.263642
					2.54153	2.08088	2.71226	2.91133	2.33442	2.75305	2.19885	3.04042	2.13792	4.25283	3.3027	3.41841	2.45863	2.92487		2.70757	1.93225	2.72168	2.94669	2.69255	2.44394	2.2934	3.3308	2.28512	3.3581	2.81311	2.92802	2.75415	2.74082											17.982	0.148921	0.0809134	0.135054	0.225508	0.265702
					2.42454	1.84855	2.60324	3.06789	2.62039	2.6299	2.32581	3.15038	2.51274	3.88677	3.12216	2.95283	2.44468	2.86287		2.70256	1.96235	2.47915	2.74104	2.6134	2.24615	2.18618	2.95418	2.18056	3.17878	2.83016	2.50778	2.99021	2.59115											18.981	0.151172	0.0797032	0.137101	0.228716	0.272617
					2.59189	1.90473	2.39747	2.857	2.46324	2.36281	2.25612	2.93319	2.35724	3.99231	2.67483	2.77775	2.53615	2.6698		2.56937	2.07433	2.49348	2.6952	2.56596	2.42197	2.15467	2.90472	2.19316	2.95631	2.91316	2.73549	2.69533	2.53863											19.98	0.15316	0.0786929	0.139222	0.231593	0.274217
					2.6264	1.89744	2.41364	2.78846	2.38585	2.43641	2.25079	2.8969	2.20462	3.24546	2.62027	2.38139	2.55121	2.62922		2.43875	1.95455	2.39462	2.75025	2.66139	2.26618	2.12451	3.15819	2.32002	3.02864	2.50173	2.54711	2.63403	2.45678											20.979	0.155383	0.0778936	0.141429	0.234682	0.280943
					2.5955	1.76966	2.41046	2.94069	2.31496	2.20483	2.4786	3.01972	2.11887	3.23196	2.39154	2.30575	2.47107	2.45601		2.43424	1.68685	2.25024	2.67699	2.34337	2.26229	2.22019	2.86697	2.10017	2.94181	2.61627	2.29902	2.38439	2.36242											21.978	0.157356	0.0772484	0.143722	0.237475	0.282284
					2.89032	1.8939	2.258	2.72275	2.32004	2.44616	2.225	2.91746	1.96104	3.15574	2.34902	2.04593	2.34766	2.68474		2.3071	1.81206	2.22345	2.66946	2.58379	2.24702	2.1939	2.77792	2.06668	2.74471	2.66699	2.26263	2.57181	2.43499											22.977	0.159612	0.0767762	0.146112	0.240538	0.288951
					2.63464	1.8827	2.2636	2.95332	2.40011	2.44335	2.39366	2.86452	1.79759	3.7869	2.39556	2.06491	2.14391	2.40124		2.40436	1.69064	2.30326	2.85511	2.60503	2.24007	2.03805	2.66612	1.93065	2.70962	2.69713	2.16862	2.31189	2.30929											23.976	0.161621	0.0764242	0.148599	0.243322	0.290165
					2.63391	1.84439	2.23165	2.80785	2.44236	2.38633	2.18091	2.99894	1.78958	4.77947	2.39282	2.08681	2.2628	2.22516		2.29466	1.85997	2.23551	2.51464	2.61171	2.22964	2.17572	2.60991	1.74246	2.69041	2.56481	2.14507	2.15101	2.2307											24.975	0.163951	0.0762174	0.15119	0.246419	0.296853
					2.31195	1.7863	2.39199	2.94652	2.35586	2.38554	2.03059	2.82717	1.77755	4.45381	2.40617	2.00578	2.17471	2.41785		2.51398	1.72953	2.21358	2.37745	2.32544	2.20103	2.04746	2.7534	1.72978	2.71573	2.46752	2.05338	2.08004	2.28157											25.974	0.16603	0.076106	0.153886	0.24924	0.29803
					2.49689	1.82401	2.23309	2.74733	2.35824	2.13368	2.24313	2.93773	1.87617	3.98641	2.46774	2.12899	2.11373	2.34686		2.41808	1.81086	2.28077	2.72532	2.50153	2.2754	2.05482	2.76126	1.66589	2.51948	2.47452	1.93245	2.05477	2.12847											26.973	0.168464	0.0761195	0.156693	0.252409	0.304783
					2.53393	1.93942	2.72634	2.55881	2.64602	2.21454	2.48142	2.8516	1.89796	3.50807	2.45347	1.85945	2.06994	2.34034		2.4349	1.90995	2.03568	2.51123	2.41675	2.33404	2.37679	2.79818	1.75148	2.65315	2.22088	2.05659	2.03404	2.18348											27.972	0.170636	0.0762095	0.159609	0.255298	0.305984
					2.43072	1.79746	2.52165	2.84849	2.37013	2.18682	2.51008	2.76188	1.73156	4.43394	2.23528	2.00667	2.17665	2.23065		2.36614	1.87591	2.26652	2.69694	2.42544	2.09756	2.13841	2.60855	1.67619	2.41369	2.2309	1.88549	1.99462	2.22216											28.971	0.173194	0.0764096	0.162642	0.258562	0.31282
					2.54341	1.79084	2.47011	2.53139	2.41093	2.17947	2.51757	2.63063	1.71116	4.32041	2.30053	1.88216	2.18887	2.33127		2.31604	1.78818	2.14942	2.49648	2.20086	2.20759	2.17693	2.49263	1.5699	2.40014	2.18679	1.88308	1.8774	2.12263											29.97	0.175476	0.0766719	0.165788	0.261533	0.314082
					2.27013	1.70217	2.2975	2.62137	2.33224	2.12196	2.24482	2.58729	1.85489	3.21247	2.29588	1.8133	2.11414	2.16639		2.17497	1.85186	2.10968	2.27841	2.1923	2.11662	2.20335	2.63231	1.62352	2.57263	2.39684	1.74147	2.1522	2.09266											30.969	0.178172	0.0770329	0.169054	0.264903	0.321001
					2.41033	1.79425	2.32236	2.59393	2.61351	2.10031	2.40422	2.73205	1.55369	3.1205	2.15192	1.86455	1.88859	2.31356		2.18002	1.80318	2.05375	2.47138	2.38755	2.14175	2.17665	2.43966	1.73801	2.43561	2.1981	1.86132	2.06278	2.07999											31.968	0.180573	0.077445	0.172435	0.267963	0.322343
					2.34996	1.84815	2.41737	2.51864	2.39909	2.18624	2.42805	2.43019	1.68091	3.20227	2.23639	1.90551	1.99465	2.3447		2.13307	1.82227	2.15285	2.45719	2.35744	1.97804	2.27565	2.33197	1.623	2.58099	2.07851	1.86314	1.96655	2.26262											32.967	0.183417	0.0779469	0.175938	0.271441	0.329324
					2.37642	1.83561	2.29031	2.39389	2.3476	1.99273	2.32204	2.36549	1.88922	3.1443	2.10613	1.59114	1.96983	2.27615		2.27297	1.8161	2.14991	2.39256	2.13015	1.98949	2.21724	2.41523	1.53595	2.42537	2.04661	1.71132	1.87541	2.19968											33.966	0.185942	0.0784907	0.179558	0.274586	0.330752
					2.14452	1.68017	2.17686	2.43267	2.27243	2.01396	2.40216	2.36647	1.54998	2.96157	2.10858	1.7779	1.97976	2.15813		2.2302	1.87539	2.13673	2.5455	2.20334	1.97611	2.0836	2.6585	1.50916	2.54076	2.15731	1.64421	1.92059	2.08474											34.965	0.188936	0.0791173	0.183298	0.278166	0.337754
					2.2491	1.65496	2.18994	2.39699	2.25301	2.11407	2.43917	2.45329	1.56313	2.61564	2.29024	1.70722	1.97433	2.21191		2.20544	1.72737	1.86077	2.37117	2.38607	1.92446	2.14549	2.27569	1.53397	2.43899	2.01624	1.72289	1.95971	2.20033											35.964	0.191585	0.0797776	0.187152	0.281386	0.33926
					2.32435	1.76624	2.22584	2.28105	2.40219	2.10594	2.45487	2.34175	1.46229	2.84272	1.99336	1.75151	1.9115	2.08631		2.1322	1.73952	1.90757	2.35366	2.30499	2.0066	2.09943	2.34388	1.49519	2.56223	2.08033	1.77851	1.86268	2.2572											36.963	0.194726	0.0805145	0.191124	0.285053	0.346225
					2.13564	1.74271	2.08833	2.30533	2.42229	2.06712	2.24339	2.33123	1.56615	2.79642	2.14498	1.71956	1.87257	2.00056		2.36261	1.88732	1.85506	2.3515	2.2524	1.84337	2.0832	2.14766	1.70254	2.39822	2.03587	1.5177	1.86141	1.97795											37.962	0.197493	0.0812778	0.195206	0.288331	0.347787
					2.23528	1.75957	2.16254	2.28558	2.29151	1.92689	2.42688	2.2082	1.66641	2.51924	2.06188	1.63893	2.1205	2.00449		2.22312	1.82222	1.7597	2.25147	2.19548	1.74933	2.04044	2.29047	1.51993	2.43094	2.13889	1.53298	1.90537	1.97058											38.961	0.200775	0.0821116	0.1994	0.292063	0.354633
					2.40898	1.6715	2.09547	2.28634	2.22504	1.86606	2.41544	2.07977	1.60887	2.82798	1.92695	1.52406	3.57236	1.99368		2.38751	1.641	1.81899	2.12806	2.20782	1.80384	2.01282	2.1755	1.40183	2.36211	1.95545	1.65808	3.12954	1.9512											39.96	0.203649	0.0829645	0.203695	0.295372	0.356215
					2.12472	1.67536	2.08725	2.07628	2.21528	1.90458	2.42311	2.28446	1.52067	2.82953	2.06441	1.66446	3.3162	2.02051		2.0242	1.82888	1.78796	2.18415	2.16803	1.82016	2.00916	2.06143	1.53771	2.46212	1.89965	1.48718	3.05447	2.17926											40.959	0.207056	0.0838818	0.208092	0.299139	0.362843
					2.15023	1.65039	2.16556	2.14753	2.15593	1.86387	2.35775	2.22218	1.53581	2.80014	1.93324	1.61728	2.14622	1.93908		2.23556	1.78714	1.95696	2.11564	1.95872	1.80934	1.95206	2.16901	1.5714	2.52094	2.10654	1.5535	2.17309	2.03884											41.958	0.210017	0.0848105	0.212578	0.302447	0.364392
					2.17273	1.68442	1.97786	2.13128	2.06631	1.85472	2.38817	2.26196	1.5611	2.52865	2.04268	1.46823	2.3781	2.08346		2.33421	1.642	1.80224	2.1698	1.82507	1.77352	2.00546	2.15741	1.47618	2.33121	1.99321	1.4864	2.04955	2.02741											42.957	0.213527	0.0857966	0.217153	0.306211	0.370679
					2.12527	1.70273	2.16583	2.18918	2.12542	1.98063	2.33832	2.09611	1.45041	2.49423	1.99843	1.6173	2.17808	2.19044		2.16737	1.68624	1.84765	2.10437	1.95851	1.73612	1.9051	2.20914	1.47813	2.36842	1.98962	1.32005	1.90273	1.99831											43.956	0.216551	0.0867857	0.221799	0.309476	0.372132
					2.06765	1.67382	2.1703	2.04347	2.02856	1.89024	2.29432	2.09159	1.56893	3.02407	2.02043	1.47785	1.94324	2.02945		1.97346	1.70365	1.90583	2.15093	2.02714	1.74604	2.00751	1.99253	1.4547	2.31231	1.87313	1.5324	1.81057	1.99187											44.955	0.220132	0.0878241	0.226515	0.313191	0.377932
					2.28477	1.55935	2.0215	2.09034	2.03035	2.05235	2.18249	2.18324	1.54737	2.79016	2.00012	1.51607	1.86802	2.02612		2.24927	1.76676	1.70739	2.04798	1.97563	1.65703	1.98185	2.16339	1.42032	2.55895	1.98048	1.58193	1.695	2.05324											45.954	0.223182	0.0888559	0.23128	0.316365	0.37921
					2.02893	1.62012	2.04791	2.02879	1.99964	1.94533	2.34301	2.18394	1.56071	2.82407	1.9835	1.64789	1.82187	2.00836		2.07884	1.63428	1.72461	1.93698	1.84996	1.78404	1.95241	2.11994	1.36092	2.3469	1.98125	1.55023	1.77104	2.03651											46.953	0.226793	0.0899275	0.23609	0.319976	0.384363
					2.05697	1.62973	2.14563	2.10743	1.83761	1.94332	2.45897	2.21142	1.59798	2.71322	1.98677	2.06849	2.16747	3.32441		2.11761	1.7406	1.74641	1.88725	1.83129	1.68367	1.94326	1.99808	1.62429	2.39239	2.08897	2.42601	2.19977	3.80443											47.952	0.229824	0.0909815	0.240921	0.323003	0.385376
					2.01915	1.47272	2.08174	1.98226	2.17927	1.98383	2.45432	2.14579	1.53803	2.84249	1.89895	1.50646	1.84403	1.9369		1.98344	1.60057	1.8242	1.86917	1.91588	1.76072	1.90101	2.14113	1.36761	2.23967	1.93241	1.53965	1.78976	2.09614											48.951	0.233412	0.0920638	0.245766	0.32645	0.389707
					2.17639	1.58264	2.19774	2.04087	2.04093	1.92895	2.41198	2.10642	1.51119	2.75861	1.94096	1.55909	1.76764	1.98827		1.93236	1.63432	1.64651	1.9186	1.73027	1.65348	1.96988	1.92398	1.42311	2.40531	1.88336	1.48948	1.66333	2.0483											49.95	0.236369	0.093116	0.250597	0.329267	0.390359
					2.00226	1.49144	2.14749	1.94686	1.88095	1.9269	2.45216	2.11824	1.61459	3.01155	2.00462	1.42735	1.8563	1.93987		2.15402	1.57654	1.74149	2.02069	1.92537	1.7453	1.9247	2.16292	1.40413	2.26682	1.89233	1.55467	1.65556	2.02287											50.9491	0.23987	0.0941829	0.255405	0.33248	0.393687
					2.08729	1.61227	2.04396	1.83618	1.87966	1.71877	2.43513	2.13406	1.57826	2.53927	1.74297	1.57872	1.93524	1.98713		2.0022	1.53572	1.76726	1.94261	1.68172	1.64617	1.80834	1.90575	1.47677	2.15194	1.91358	1.45957	1.71774	1.88802											51.9481	0.242687	0.0952056	0.260159	0.335022	0.39388
					1.96924	1.5722	2.06364	1.76412	2.00885	1.87641	2.39504	2.07027	1.52041	2.31303	2.02884	1.50287	1.98052	1.9807		2.01324	1.56375	1.73041	1.68628	1.91099	1.64254	1.83825	2.01981	1.46792	2.33454	1.89847	1.47086	1.78638	2.08284											52.9471	0.246025	0.0962271	0.264846	0.337929	0.39603
					2.04262	1.42526	1.9339	1.95497	2.02951	1.87355	2.4679	2.02067	1.51432	2.34267	1.89401	1.55903	1.76228	1.86972		1.9407	1.66854	1.73536	1.91808	1.87354	1.68226	1.96389	2.20811	1.36425	1.98996	1.8905	1.47805	1.9054	1.90546											53.9461	0.248623	0.097189	0.269434	0.340124	0.395676
					2.0085	1.57411	2.07564	1.9818	1.94709	1.69685	2.27476	2.01644	1.52147	2.47624	1.7466	1.49332	1.96208	1.94691		1.95646	1.52498	1.92452	1.80036	1.81604	1.73155	1.85544	1.98682	1.41973	2.10768	1.72816	1.51343	1.66799	1.75398											54.9451	0.251711	0.0981317	0.273906	0.342649	0.396491
					1.95696	1.54168	2.07554	1.90718	1.92315	1.72131	2.30472	2.11522	1.48657	2.54559	1.75598	1.5742	1.75884	1.77307		1.95408	1.42897	1.74468	1.79402	1.93248	1.72441	1.85099	2.06007	1.40143	2.08025	1.62598	1.40979	1.62333	1.88512											55.9441	0.254007	0.0989981	0.278228	0.344428	0.395514
					1.81318	1.38696	1.90804	1.91443	1.76024	1.77086	2.27142	2.02493	1.52242	2.37632	1.765	1.39328	1.81636	1.9065		2.13213	1.41309	1.73316	1.77107	1.69118	1.6874	1.82922	1.96114	1.36826	2.04063	1.72088	1.49494	1.74558	1.85737											56.9431	0.256749	0.0998259	0.282382	0.346497	0.39487
					2.01312	1.42602	1.86625	1.78267	1.74204	1.63153	2.20976	1.98647	1.55517	2.24644	1.74728	1.38605	1.84647	1.73287		1.94679	1.48491	1.67326	1.81279	1.74092	1.69999	1.8482	1.98966	1.52895	2.00711	1.69213	1.43798	1.68405	1.90221											57.9421	0.25865	0.10056	0.286333	0.34779	0.393221
					1.96273	1.52547	1.66394	1.90056	1.55745	1.64108	1.69944	2.05619	1.53942	2.28614	1.87542	1.45004	1.92015	1.81795		2.00371	1.45079	1.75079	1.59064	1.72162	1.59141	1.60979	1.94158	1.38324	2.00813	1.83683	1.34603	1.66573	1.76164											58.9411	0.260947	0.101236	0.290063	0.349332	0.391036
					1.99914	1.3646	1.65747	1.87339	1.50623	1.70503	1.7359	2.08108	1.49869	2.34844	1.66323	1.46017	1.8546	1.72295		1.78979	1.42036	1.67936	1.6735	1.6223	1.72576	1.52294	1.94594	1.46142	2.10272	1.76288	1.51346	1.73525	1.92183											59.9401	0.262359	0.101801	0.293536	0.350079	0.388698
					1.92602	1.47183	1.64541	1.81574	1.46439	1.54191	1.55608	1.99987	1.5299	2.95538	1.62772	1.3995	1.8745	1.69747		1.94311	1.5049	1.55417	1.83359	1.57885	1.70731	1.4802	1.94727	1.47267	2.05891	1.71406	1.28318	1.78055	1.86103											60.9391	0.26411	0.102287	0.296736	0.351031	0.384945
					2.06722	1.54071	1.67664	1.71608	1.55759	1.55169	1.70731	2.07524	1.35833	2.86269	1.61827	1.37826	1.97291	1.89985		1.78848	1.43405	1.67626	1.65611	1.67255	1.62286	1.55758	1.79224	1.39626	2.03752	1.72639	1.57281	1.71932	1.8035											61.9381	0.264945	0.102647	0.299628	0.35118	0.381933
					1.78046	1.41088	1.69517	1.8409	1.53813	1.48561	1.57365	1.94415	1.41066	2.20138	1.66484	1.37854	2.11256	1.81712		1.82949	1.38424	1.5847	1.72014	1.74955	1.57595	1.55079	1.87122	1.3342	2.08549	1.59015	1.2901	1.87236	1.6767											62.9371	0.266056	0.10291	0.3022	0.35149	0.376646
					1.84446	1.36357	1.73441	1.61927	1.5205	1.55086	1.47718	1.9615	1.41003	2.10425	1.49336	1.37464	1.91998	1.7913		1.99258	1.39646	1.55885	1.72079	1.61535	1.44582	1.47606	1.93615	1.20491	1.91814	1.66839	1.35899	1.85306	1.54779											63.9361	0.266233	0.103036	0.304418	0.351002	0.373011
					1.79044	1.40543	1.75491	1.6305	1.59576	1.58626	1.49832	1.94808	1.3207	2.04073	1.4893	1.3491	1.98762	1.63115		1.84031	1.49299	1.74072	1.61631	1.61884	1.51544	1.53625	1.96369	1.36752	1.87674	1.57973	1.42012	1.8943	1.68381											64.9351	0.266624	0.103047	0.306276	0.350635	0.366281
					1.73066	1.37793	1.6496	1.57816	1.56405	1.53081	1.49368	1.98584	1.30076	2.14345	1.48112	1.45012	1.87429	1.65536		1.86728	1.39947	1.56906	1.64203	1.5904	1.47868	1.39752	1.96376	1.35707	1.95651	1.63258	1.20303	1.68614	1.63604											65.9341	0.266082	0.102913	0.307745	0.349487	0.362104
					1.80015	1.43035	1.63852	1.76609	1.53414	1.41855	1.55304	1.89507	1.44916	2.48375	1.44774	1.30636	1.82021	1.71123		1.7774	1.38402	1.55916	1.58602	1.60407	1.406	1.46345	1.83178	1.3238	2.01114	1.56679	1.32366	1.65462	1.66554											66.9331	0.265693	0.102654	0.308824	0.348423	0.354075
					1.84445	1.34665	1.57613	1.68487	1.47581	1.44721	1.52735	1.94201	1.43599	2.11973	1.51715	1.32375	1.83099	1.65172		1.77476	1.27687	1.56408	1.6242	1.61329	1.44405	1.49981	1.86737	1.27061	1.88262	1.57476	1.30979	1.60372	1.66298											67.9321	0.264393	0.102247	0.309491	0.34661	0.349459
					1.82007	1.23118	1.59027	1.56939	1.44882	1.32089	1.48228	1.93303	1.4395	1.90234	1.40677	1.27525	1.78736	1.65224		1.81977	1.27982	1.5467	1.5026	1.50997	1.41591	1.49533	1.89655	1.29604	1.8088	1.42389	1.26084	1.45798	1.56906											68.9311	0.263192	0.101707	0.30975	0.344849	0.340316
					1.85629	1.35044	1.57959	1.55516	1.39468	1.31119	1.43565	1.85749	1.4104	1.8679	1.38825	1.39878	1.7383	1.5892		1.75459	1.26999	1.56483	1.55746	1.36753	1.36738	1.4348	1.88775	1.26755	1.78044	1.54258	1.27976	1.50699	1.72539											69.9301	0.261121	0.101024	0.309588	0.342384	0.335377
					1.75708	1.37759	1.50912	1.46506	1.40157	1.40354	1.45515	1.92764	1.29743	1.91203	1.48201	1.39077	1.86803	1.6683		1.68372	1.30304	1.51886	1.49127	1.60106	1.30266	1.40934	1.91524	1.24427	1.91348	1.40493	1.24946	1.53672	1.7346											70.9291	0.259107	0.100207	0.309015	0.339946	0.325332
					1.72519	1.28322	1.52543	1.554	1.40417	1.28886	1.44884	1.84893	1.39218	1.87548	1.42022	1.25773	1.9761	1.59512		1.81656	1.17248	1.52626	1.45603	1.43292	1.39001	1.36634	1.78632	1.1756	1.92966	1.42932	1.29333	1.61697	1.54146											71.9281	0.256286	0.0992564	0.308026	0.33686	0.320191
					1.76247	1.35565	1.49175	1.62868	1.49171	1.31198	1.48672	1.83091	1.33463	2.09552	1.47073	1.22116	2.15539	1.64376		1.89828	1.31876	1.5106	1.44252	1.46717	1.37776	1.35346	1.8668	1.18406	1.79932	1.38823	1.24396	1.62673	1.48011											72.9271	0.25349	0.0981763	0.306638	0.333783	0.309471
					1.73993	1.2756	1.44705	1.47947	1.48548	1.34845	1.4393	1.87888	1.31805	2.11606	1.29157	1.37858	2.16359	1.58591		1.74602	1.20421	1.52512	1.45374	1.38162	1.20978	1.38731	1.70893	1.33868	1.74106	1.29326	1.24952	1.75337	1.51145											73.9261	0.249968	0.0969784	0.304852	0.330123	0.30424
					1.63352	1.29897	1.47288	1.35958	1.27046	1.35039	1.35729	1.73979	1.36627	1.71522	1.29308	1.30579	1.88212	1.62471		1.61642	1.18269	1.45848	1.43315	1.36225	1.2416	1.3374	1.80764	1.18289	1.67387	1.38488	1.26737	1.63355	1.57085											74.9251	0.246452	0.0956605	0.302692	0.326459	0.293071
					1.82916	1.1747	1.39107	1.36604	1.2969	1.28522	1.28879	1.79676	1.25079	1.8364	1.38316	1.35185	1.81563	1.46006		1.59994	1.23612	1.38178	1.47245	1.35486	1.26014	1.3178	1.75544	1.21337	1.73628	1.36656	1.22862	1.35932	1.50928											75.9241	0.242304	0.0942446	0.300166	0.322286	0.287855
					1.63467	1.25335	1.39252	1.39757	1.33816	1.22888	1.38519	1.70023	1.35293	1.8639	1.23405	1.28951	1.72704	1.63476		1.46381	1.263	1.48813	1.34526	1.35455	1.20875	1.3181	1.64779	1.17189	1.67773	1.38692	1.15894	1.39618	1.48968											76.9231	0.238156	0.0927225	0.297301	0.318102	0.276451
					1.61057	1.23363	1.34428	1.3786	1.28721	1.19739	1.32539	1.80758	1.32073	1.86378	1.32485	1.34307	1.6174	1.41361		1.62097	1.2432	1.41569	1.38927	1.46389	1.30557	1.34708	1.69153	1.1579	1.72566	1.27964	1.15003	1.35116	1.47998											77.9221	0.233482	0.0911249	0.294112	0.313485	0.271337
					1.57588	1.21041	1.40742	1.37498	1.25286	1.19422	1.32145	1.68739	1.33818	1.86415	1.32405	1.21425	1.63588	1.42334		1.48469	1.16967	1.44115	1.29393	1.3028	1.23124	1.3216	1.59152	1.19991	1.64734	1.22162	1.13399	1.34748	1.41415											78.9211	0.22881	0.0894375	0.290629	0.308856	0.259893
					1.66164	1.1333	1.40042	1.34966	1.26833	1.24608	1.26223	1.67475	1.29997	1.72172	1.25568	1.30199	1.69134	1.44887		1.48781	1.26512	1.44843	1.26474	1.37183	1.16174	1.29293	1.72783	1.12599	1.55182	1.27177	1.18793	1.37217	1.37444											79.9201	0.22372	0.0876986	0.286869	0.303873	0.254952
					1.48016	1.2141	1.42728	1.31049	1.22197	1.20431	1.29726	1.63711	1.20774	1.79254	1.25863	1.25537	1.84277	1.38623		1.58226	1.14508	1.45401	1.29517	1.32719	1.14985	1.30553	1.64726	1.11387	1.63443	1.24849	1.12201	1.26882	1.41202											80.9191	0.218643	0.0858874	0.282866	0.29888	0.243638
					1.64197	1.1784	1.43173	1.32849	1.19288	1.20497	1.21662	1.72176	1.22867	1.81482	1.2988	1.37117	1.57908	1.48767		1.65943	1.17429	1.43088	1.21931	1.22415	1.11933	1.25591	1.61446	1.19509	1.5084	1.3293	1.1563	1.25983	1.41255											81.9181	0.213254	0.0840483	0.278638	0.29361	0.238923
					1.52215	1.15729	1.33851	1.2988	1.24081	1.23093	1.30378	1.65622	1.13561	1.7685	1.16745	1.23007	1.60187	1.38005		1.47771	1.05364	1.39481	1.19986	1.28253	1.17789	1.22597	1.76833	1.09528	1.55673	1.23664	1.29829	1.26104	1.36597											82.9171	0.207895	0.0821544	0.274218	0.288336	0.22788
					1.45419	1.14405	1.38227	1.28222	1.16172	1.24175	1.2675	1.69115	1.24556	1.86873	1.23206	1.27797	1.67521	1.44067		1.4492	1.13461	1.26657	1.23403	1.27496	1.15999	1.27273	1.6788	1.19493	1.64658	1.29089	1.10505	1.27535	1.43396											83.9161	0.202323	0.0802547	0.269627	0.282856	0.223432
					1.51058	1.2102	1.32056	1.25501	1.20292	1.11424	1.23497	1.61998	1.27048	1.63722	1.11279	1.22044	1.67043	1.34879		1.53875	1.17863	1.37692	1.2986	1.20794	1.0607	1.24705	1.47285	1.11143	1.59648	1.25929	1.14694	1.20334	1.32542											84.9151	0.1968	0.0783167	0.264896	0.277381	0.212771
					1.47926	1.13629	1.30777	1.31001	1.13949	1.13308	1.22591	1.55702	1.15522	1.67285	1.14602	1.21611	1.74253	1.36741		1.50722	1.16939	1.32736	1.30618	1.24648	1.10724	1.21992	1.60346	1.07617	1.49086	1.23885	1.14795	1.24323	1.34352											85.9141	0.191154	0.0763923	0.260045	0.271768	0.208617
					1.51455	1.12152	1.32603	1.24969	1.15195	1.15374	1.18762	1.55665	1.32502	1.58483	1.20548	1.308	1.83353	1.25221		1.44833	1.09284	1.28617	1.2483	1.22074	1.05604	1.15558	1.52427	1.16774	1.52932	1.23527	1.06377	1.24173	1.2556											86.9131	0.185575	0.0744444	0.255103	0.266168	0.198424
					1.44059	1.13828	1.31667	1.21804	1.12797	1.02084	1.12887	1.51924	1.25385	1.7097	1.17225	1.21798	1.63684	1.32057		1.47051	1.08872	1.2623	1.20321	1.21958	1.11508	1.22932	1.49687	1.09197	1.46747	1.21079	1.07749	1.18562	1.3615											87.9121	0.179951	0.0725267	0.250088	0.260491	0.194578
					1.38751	1.16736	1.30595	1.27327	1.06908	1.14653	1.17899	1.55527	1.22776	1.92678	1.16115	1.26212	1.64273	1.28473		1.44188	1.17978	1.23658	1.18832	1.21606	1.17416	1.19455	1.56739	1.11213	1.45337	1.32093	1.13055	1.14764	1.3267											88.9111	0.174411	0.0705979	0.245027	0.254837	0.184914
					1.38485	1.15784	1.26256	1.11286	1.12489	1.13049	1.1747	1.51046	1.20067	1.7319	1.153	1.2718	1.69422	1.35085		1.40519	1.21243	1.31461	1.07718	1.18256	1.03283	1.16152	1.54226	1.1184	1.43595	1.16574	1.09896	1.30836	1.27189											89.9101	0.168889	0.0687127	0.239936	0.249158	0.181382
					1.30331	1.11198	1.33026	1.1104	1.07804	1.15771	1.25163	1.55468	1.25239	1.54696	1.14457	1.27925	1.64171	1.34208		1.34758	1.09335	1.27318	1.09608	1.14553	1.02182	1.17102	1.57079	1.22587	1.56229	1.20656	1.22226	1.11957	1.28658											90.9091	0.163467	0.0668266	0.234838	0.243512	0.172286
					1.39004	1.12098	1.22906	1.11177	1.11034	1.12083	1.12149	1.59713	1.27992	1.71437	1.10489	1.23996	1.86797	1.36248		1.34257	1.10523	1.31774	1.16443	1.17132	1.0357	1.17457	1.39411	1.1737	1.54885	1.21017	1.33363	1.16253	1.36946											91.9081	0.158112	0.0649944	0.229747	0.237885	0.169067
					1.39272	1.03899	1.27569	1.13604	1.0886	0.988074	1.00686	1.59007	1.25643	1.68129	1.11914	1.30632	1.72226	1.31594		1.26018	1.02218	1.30379	1.03561	1.18756	1.05394	1.18396	1.45624	1.05736	1.52349	1.10676	1.11903	1.38057	1.21074											92.9071	0.152871	0.0631692	0.224683	0.232302	0.160559
					1.339	1.17212	1.28526	1.06291	1.10082	1.02292	1.01369	1.45453	1.14575	1.50867	1.09431	1.35615	1.66812	1.34986		1.33983	1.18325	1.23188	1.14308	1.12637	1.00718	1.14851	1.4628	1.21176	1.49808	1.15646	1.11723	1.32282	1.38063											93.9061	0.147732	0.0614051	0.219656	0.226774	0.157649
					1.21227	1.05919	1.31824	1.06883	1.03262	1.09555	1.00864	1.49348	1.1374	1.33563	1.11032	1.33687	1.81719	1.33912		1.40322	1.01921	1.17158	1.11564	1.11108	0.977504	1.08908	1.38378	1.00931	1.57898	1.1141	1.15545	1.23854	1.25519											94.9051	0.142718	0.0596541	0.214684	0.221299	0.149735
					1.19823	1.09366	1.16583	1.12307	1.05771	1.04286	1.01599	1.46734	1.20828	1.34334	1.05665	1.52402	1.88523	1.25842		1.2963	1.03414	1.35244	0.977455	1.10348	0.983024	1.13185	1.436	1.10204	1.47246	1.2073	1.14321	1.21513	1.16217											95.9041	0.137831	0.0579689	0.209775	0.215907	0.147123
					1.2778	1.0137	1.28173	1.1764	0.962511	0.983116	0.995015	1.50682	1.28657	1.47099	0.99292	1.32269	1.6484	1.23224		1.28786	1.01889	1.26277	1.02649	1.01241	0.981556	1.08116	1.43409	1.10556	1.52053	1.18181	1.19354	1.22175	1.21607											96.9031	0.133076	0.056301	0.204943	0.210578	0.139799
					1.15553	1.00332	1.1664	1.09251	1.02218	0.920134	0.979759	1.47694	1.17508	1.43646	1.1352	1.35551	1.79125	1.46966		1.31571	1.01718	1.16064	1.02233	1.0902	0.906277	1.06417	1.40489	1.18159	1.49381	1.07231	1.30183	1.29379	1.7826											97.9021	0.128464	0.0547016	0.200192	0.205353	0.137474
																																												98.9011	0.123988	0.0531222	0.195536	0.200198	0.130724
																																												99.9001	0.119663	0.051612	0.190976	0.195163	0.128672
																																												100.899	0.115477	0.0501236	0.186523	0.190206	0.122478
																																												101.898	0.111443	0.0487037	0.182178	0.185378	0.120685
																																												102.897	0.107548	0.0473063	0.177947	0.180634	0.11502
																																												103.896	0.103802	0.0459758	0.173832	0.176023	0.113471
																																												104.895	0.100195	0.0446678	0.169836	0.171504	0.108309
																																												105.894	0.0967298	0.0434241	0.16596	0.167118	0.106991
																																												106.893	0.0934031	0.0422027	0.162207	0.162829	0.102304
																																												107.892	0.0902076	0.0410425	0.158576	0.15867	0.101201
																																												108.891	0.0871496	0.0399039	0.155068	0.154613	0.0969593
																																												109.89	0.0842112	0.0388229	0.151682	0.150681	0.096059
																																												110.889	0.0814086	0.0377626	0.148419	0.146856	0.0922343
																																												111.888	0.0787131	0.0367563	0.145277	0.143148	0.0915228
																																												112.887	0.0761517	0.0357698	0.142256	0.139551	0.0880873
																																												113.886	0.0736843	0.0348332	0.139353	0.136062	0.0875521
																																												114.885	0.0713492	0.0339156	0.136569	0.132689	0.0844788
																																												115.884	0.0690952	0.033044	0.1339	0.129412	0.0841075
																																												116.883	0.0669715	0.0321904	0.131346	0.126256	0.0813701
																																												117.882	0.0649163	0.0313788	0.128903	0.123184	0.0811508
																																												118.881	0.0629896	0.0305844	0.126573	0.120238	0.0787241
																																												119.88	0.0611189	0.0298282	0.12435	0.117363	0.078645
																																												120.879	0.0593751	0.0290884	0.122234	0.114617	0.0765044
																																												121.878	0.0576756	0.028383	0.120222	0.111932	0.0765535
																																												122.877	0.0561012	0.0276933	0.118313	0.109378	0.0746752
																																												123.876	0.0545599	0.0270345	0.116503	0.106873	0.0748401
																																												124.875	0.0531423	0.0263907	0.114792	0.104503	0.0732006
																																												125.874	0.0517471	0.0257743	0.113175	0.102168	0.0734684
																																												126.873	0.050474	0.0251725	0.111652	0.099972	0.0720445
																																												127.872	0.0492133	0.0245947	0.110219	0.0978002	0.0724014
																																												128.871	0.0480734	0.0240312	0.108874	0.0957687	0.0711699
																																												129.87	0.0469363	0.0234885	0.107614	0.0937505	0.0716012
																																												130.869	0.0459186	0.0229596	0.106438	0.0918748	0.0705391
																																												131.868	0.0448947	0.0224487	0.105341	0.0900014	0.071029
																																												132.867	0.043989	0.0219514	0.104322	0.0882725	0.070113
																																												133.866	0.0430682	0.0214692	0.103376	0.0865353	0.0706445
																																												134.865	0.0422645	0.0210004	0.102502	0.0849442	0.0698516
																																												135.864	0.0414373	0.0205441	0.101695	0.0833348	0.0704069
																																												136.863	0.040726	0.0201011	0.100953	0.0818728	0.0697143
																																												137.862	0.0399832	0.0196681	0.100272	0.0803826	0.0702747
																																												138.861	0.0393552	0.0192485	0.0996485	0.0790409	0.0696601
																																												139.86	0.0386877	0.0188364	0.0990776	0.0776616	0.0702068
																																												140.859	0.038134	0.0184378	0.0985573	0.0764316	0.069649
																																												141.858	0.0375332	0.0180446	0.0980813	0.0751548	0.0701631
																																												142.857	0.0370451	0.0176648	0.0976472	0.0740278	0.0696423
																																												143.856	0.0365026	0.0172886	0.0972488	0.0728453	0.0701058
																																												144.855	0.0360716	0.0169259	0.0968833	0.0718128	0.0696043
																																												145.854	0.0355791	0.016565	0.0965441	0.070716	0.0700003
																																												146.853	0.0351971	0.0162177	0.0962283	0.0697693	0.069503
																																												147.852	0.0347469	0.0158705	0.0959291	0.0687499	0.0698165
																																												148.851	0.0344061	0.0155372	0.0956434	0.0678805	0.0693111
																																												149.85	0.0339906	0.0152026	0.0953643	0.0669301	0.0695294
																																												150.849	0.0336835	0.014882	0.0950889	0.0661293	0.0690068
																																												151.848	0.0332957	0.0145588	0.0948102	0.0652393	0.0691199
																																												152.847	0.0330154	0.0142498	0.0945254	0.0644985	0.0685744
																																												153.846	0.0326487	0.0139372	0.094228	0.0636606	0.0685747
																																												154.845	0.0323887	0.0136391	0.0939152	0.0629712	0.0680039
																																												155.844	0.0320373	0.0133364	0.093581	0.0621769	0.0678871
																																												156.843	0.0317916	0.0130484	0.0932232	0.0615305	0.0672914
																																												157.842	0.0314503	0.0127549	0.0928362	0.0607716	0.0670554
																																												158.841	0.0312139	0.0124765	0.0924186	0.06016	0.0664384
																																												159.84	0.0308781	0.0121921	0.0919654	0.0594286	0.0660836
																																												160.839	0.0306464	0.011923	0.091476	0.0588438	0.0654505
																																												161.838	0.0303124	0.0116473	0.0909463	0.0581326	0.0649795
																																												162.837	0.0300816	0.0113871	0.0903765	0.0575672	0.0643375
																																												163.836	0.0297465	0.0111201	0.0897632	0.0568692	0.0637543
																																												164.835	0.0295136	0.0108689	0.0891077	0.0563166	0.0631117
																																												165.834	0.0291752	0.0106105	0.0884076	0.0556258	0.0624219
																																												166.833	0.028938	0.0103682	0.0876648	0.0550801	0.0617873
																																												167.832	0.0285947	0.0101186	0.0868778	0.0543914	0.0609974
																																												168.831	0.0283515	0.00988525	0.0860494	0.0538477	0.0603797
																																												169.83	0.0280026	0.00964455	0.0851788	0.0531571	0.059497
																																												170.829	0.0277525	0.00942028	0.0842695	0.0526117	0.0589045
																																												171.828	0.0273976	0.00918866	0.0833214	0.0519164	0.0579367
																																												172.827	0.0271403	0.00897362	0.0823385	0.0513667	0.0573772
																																												173.826	0.0267798	0.00875129	0.0813211	0.050665	0.0563324
																																												174.825	0.0265153	0.00854563	0.0802736	0.0501098	0.0558124
																																												175.824	0.0261499	0.00833279	0.0791968	0.0494013	0.0546989
																																												176.823	0.0258786	0.00813665	0.0780953	0.0488401	0.0542238
																																												177.822	0.0255093	0.00793346	0.07697	0.0481255	0.0530501
																																												178.821	0.0252322	0.00774696	0.0758256	0.0475592	0.0526239
																																												179.82	0.0248602	0.00755355	0.074663	0.04684	0.0513985
																																												180.819	0.0245783	0.00737677	0.073487	0.0462701	0.0510239
																																												181.818	0.024205	0.00719322	0.0722984	0.0455486	0.0497551
																																												182.817	0.0239196	0.00702617	0.0711018	0.0449774	0.0494334
																																												183.816	0.0235465	0.0068525	0.069898	0.0442563	0.0481295
																																												184.815	0.0232589	0.00669516	0.0686913	0.0436864	0.0478609
																																												185.814	0.0228874	0.00653132	0.0674822	0.042969	0.04653
																																												186.813	0.022599	0.0063836	0.0662748	0.0424034	0.0463133
																																												187.812	0.0222307	0.0062295	0.0650696	0.0416929	0.0449632
																																												188.811	0.0219427	0.00609124	0.0638701	0.0411346	0.0447965
																																												189.81	0.021579	0.00594671	0.0626766	0.0404345	0.0434349
																																												190.809	0.0212929	0.00581772	0.0614924	0.0398866	0.0433152
																																												191.808	0.0209349	0.00568255	0.0603175	0.0392	0.0419492
																																												192.807	0.0206519	0.00556257	0.0591549	0.0386653	0.0418732
																																												193.806	0.020301	0.00543648	0.0580043	0.0379954	0.0405095
																																												194.805	0.0200222	0.00532522	0.0568685	0.0374767	0.0404733
																																												195.804	0.0196793	0.00520791	0.055747	0.0368263	0.0391183
																																												196.803	0.0194057	0.00510505	0.0546423	0.0363261	0.0391178
																																												197.802	0.0190717	0.00499616	0.0535536	0.0356977	0.0377771
																																												198.801	0.0188044	0.00490133	0.0524833	0.0352181	0.037808
																																												199.8	0.0184801	0.00480051	0.0514304	0.034614	0.0364868
																																												200.799	0.0182198	0.00471334	0.0503969	0.034157	0.0365451
																																												201.798	0.0179057	0.00462019	0.049382	0.0335792	0.0352478
																																												202.797	0.0176531	0.00454028	0.0483873	0.0331464	0.0353294
																																												203.796	0.0173499	0.00445441	0.0474119	0.0325967	0.0340601
																																												204.795	0.0171057	0.00438137	0.0464573	0.0321895	0.0341613
																																												205.794	0.0168136	0.00430237	0.0455224	0.0316692	0.0329232
																																												206.793	0.0165782	0.00423579	0.0446087	0.031289	0.0330405
																																												207.792	0.0162977	0.00416326	0.043715	0.0307993	0.0318364
																																												208.791	0.0160716	0.00410275	0.0428426	0.0304469	0.0319667
																																												209.79	0.0158029	0.00403628	0.0419904	0.0299887	0.0307988
																																												210.789	0.0155864	0.00398145	0.0411594	0.029665	0.0309395
																																												211.788	0.0153295	0.00392065	0.0403486	0.0292392	0.0298095
																																												212.787	0.015123	0.00387112	0.039559	0.0289447	0.0299581
																																												213.786	0.0148782	0.00381562	0.0387894	0.0285517	0.0288671
																																												214.785	0.0146818	0.00377102	0.0380408	0.0282869	0.0290219
																																												215.784	0.0144491	0.00372044	0.0373122	0.0279271	0.0279707
																																												216.783	0.0142631	0.00368042	0.0366043	0.0276923	0.0281301
																																												217.782	0.0140424	0.00363441	0.035916	0.0273658	0.0271191
																																												218.781	0.013867	0.00359863	0.0352483	0.0271611	0.0272819
																																												219.78	0.0136584	0.00355685	0.0345999	0.026868	0.026311
																																												220.779	0.0134936	0.00352498	0.0339718	0.0266933	0.0264765
																																												221.778	0.0132971	0.00348711	0.0333628	0.0264333	0.0255456
																																												222.777	0.0131431	0.00345884	0.0327737	0.0262885	0.0257133
																																												223.776	0.0129586	0.00342457	0.0322035	0.0260611	0.0248216
																																												224.775	0.0128155	0.00339961	0.0316529	0.0259458	0.0249914
																																												225.774	0.0126428	0.00336864	0.0311208	0.0257506	0.0241383
																																												226.773	0.0125107	0.00334671	0.0306081	0.0256642	0.0243102
																																												227.772	0.0123498	0.00331876	0.0301136	0.0255004	0.0234948
																																												228.771	0.0122287	0.00329959	0.0296381	0.0254422	0.0236692
																																												229.77	0.0120795	0.00327438	0.0291806	0.0253087	0.0228903
																																												230.769	0.0119694	0.00325772	0.0287418	0.0252778	0.0230677
																																												231.768	0.0118318	0.003235	0.0283207	0.0251735	0.0223242
																																												232.767	0.0117326	0.0032206	0.027918	0.0251688	0.0225052
																																												233.766	0.0116065	0.00320011	0.0275326	0.0250922	0.0217958
																																												234.765	0.0115183	0.00318775	0.0271654	0.0251124	0.0219813
																																												235.764	0.0114034	0.00316926	0.0268152	0.0250621	0.0213047
																																												236.763	0.0113261	0.0031587	0.0264827	0.0251057	0.0214956
																																												237.762	0.0112222	0.00314199	0.026167	0.0250798	0.0208502
																																												238.761	0.0111556	0.00313303	0.0258687	0.0251451	0.0210476
																																												239.76	0.0110626	0.00311787	0.0255867	0.0251417	0.020432
																																												240.759	0.0110065	0.00311029	0.0253217	0.0252268	0.0206367
																																												241.758	0.0109239	0.00309648	0.0250727	0.0252438	0.0200494
																																												242.757	0.0108782	0.0030901	0.0248401	0.0253469	0.0202626
																																												243.756	0.0108057	0.00307743	0.0246231	0.0253819	0.0197019
																																												244.755	0.01077	0.00307206	0.024422	0.0255007	0.0199245
																																												245.754	0.0107071	0.00306035	0.0242359	0.0255515	0.0193888
																																												246.753	0.0106811	0.00305581	0.0240652	0.0256838	0.0196218
																																												247.752	0.0106272	0.00304487	0.0239088	0.0257478	0.0191092
																																												248.751	0.0106104	0.00304101	0.0237672	0.0258912	0.0193534
																																												249.75	0.010565	0.00303068	0.0236391	0.0259658	0.0188621
																																												250.749	0.0105569	0.00302734	0.0235249	0.026118	0.0191182
																																												251.748	0.0105192	0.00301747	0.0234235	0.0262006	0.0186463
																																												252.747	0.0105191	0.00301452	0.0233352	0.0263591	0.0189148
																																												253.746	0.0104883	0.00300497	0.0232586	0.0264469	0.0184603
																																												254.745	0.0104954	0.00300228	0.0231941	0.0266092	0.0187415
																																												255.744	0.0104707	0.00299292	0.0231404	0.0266996	0.0183023
																																												256.743	0.0104842	0.0029904	0.0230975	0.0268631	0.0185965
																																												257.742	0.0104645	0.00298114	0.0230642	0.0269534	0.0181703
																																												258.741	0.0104834	0.00297869	0.0230406	0.0271157	0.0184776
																																												259.74	0.0104677	0.00296944	0.0230251	0.0272031	0.018062
																																												260.739	0.0104909	0.00296701	0.0230181	0.0273616	0.0183822
																																												261.738	0.010478	0.00295771	0.0230179	0.0274435	0.0179749
																																												262.737	0.0105045	0.00295524	0.0230246	0.0275959	0.0183077
																																												263.736	0.0104933	0.00294586	0.0230366	0.0276697	0.0179062
																																												264.735	0.0105218	0.00294333	0.023054	0.0278135	0.0182512
																																												265.734	0.010511	0.00293383	0.0230752	0.0278767	0.0178531
																																												266.733	0.0105404	0.00293124	0.0231003	0.0280097	0.0182098
																																												267.732	0.0105288	0.00292164	0.0231275	0.02806	0.0178127
																																												268.731	0.0105579	0.002919	0.0231571	0.0281801	0.0181805
																																												269.73	0.0105442	0.00290931	0.0231872	0.0282152	0.0177821
																																												270.729	0.0105718	0.00290666	0.0232181	0.0283203	0.0181603
																																												271.728	0.010555	0.00289691	0.023248	0.0283383	0.0177582
																																												272.727	0.0105799	0.0028943	0.0232772	0.0284268	0.0181464
																																												273.726	0.0105589	0.00288455	0.0233038	0.0284258	0.0177385
																																												274.725	0.0105801	0.00288203	0.0233284	0.0284961	0.0181359
																																												275.724	0.0105539	0.00287235	0.023349	0.0284747	0.0177205
																																												276.723	0.0105705	0.00286999	0.0233661	0.0285256	0.0181266
																																												277.722	0.0105384	0.00286044	0.0233781	0.0284825	0.0177018
																																												278.721	0.0105495	0.00285832	0.0233855	0.0285129	0.0181162
																																												279.72	0.0105107	0.00284898	0.0233866	0.0284473	0.0176807
																																												280.719	0.0105157	0.00284716	0.0233821	0.0284566	0.0181029
																																												281.718	0.0104699	0.00283811	0.0233704	0.0283679	0.0176556
																																												282.717	0.0104682	0.00283667	0.0233523	0.0283558	0.0180852
																																												283.716	0.010415	0.00282798	0.0233262	0.0282437	0.0176254
																																												284.715	0.0104063	0.00282699	0.0232931	0.0282101	0.0180621
																																												285.714	0.0103455	0.00281873	0.0232516	0.0280748	0.0175891
																																												286.713	0.0103296	0.00281823	0.0232025	0.0280199	0.0180326
																																												287.712	0.0102615	0.00281046	0.0231446	0.0278618	0.0175465
																																												288.711	0.0102383	0.00281052	0.0230791	0.0277864	0.0179965
																																												289.71	0.0101629	0.00280329	0.0230045	0.0276062	0.0174973
																																												290.709	0.0101327	0.00280393	0.0229223	0.0275109	0.0179536
																																												291.708	0.0100504	0.00279727	0.022831	0.0273096	0.0174417
																																												292.707	0.0100133	0.00279852	0.0227322	0.0271957	0.0179039
																																												293.706	0.00992459	0.00279247	0.0226246	0.0269746	0.0173801
																																												294.705	0.00988106	0.00279432	0.0225096	0.0268432	0.0178478
																																												295.704	0.00978649	0.00278889	0.0223862	0.0266036	0.0173131
																																												296.703	0.00973697	0.00279135	0.0222558	0.0264563	0.0177858
																																												297.702	0.00963722	0.00278653	0.0221175	0.0261999	0.0172413
																																												298.701	0.00958224	0.00278959	0.0219727	0.0260381	0.0177186
																																												299.7	0.00947801	0.00278538	0.0218204	0.0257666	0.0171655
																																												300.699	0.00941818	0.002789	0.0216623	0.025592	0.0176467
																																												301.698	0.00931023	0.00278537	0.0214974	0.0253072	0.0170866
																																												302.697	0.00924618	0.00278952	0.0213273	0.0251215	0.0175709
																																												303.696	0.00913526	0.00278643	0.0211511	0.0248252	0.0170053
																																												304.695	0.00906766	0.00279105	0.0209703	0.0246301	0.0174921
																																												305.694	0.00895455	0.00278848	0.0207842	0.0243242	0.0169226
																																												306.693	0.00888406	0.00279352	0.0205942	0.0241214	0.017411
																																												307.692	0.00876951	0.0027914	0.0203996	0.0238076	0.0168392
																																												308.691	0.0086968	0.0027968	0.0202021	0.0235988	0.0173283
																																												309.69	0.00858157	0.00279508	0.0200005	0.023279	0.0167557
																																												310.689	0.0085073	0.00280076	0.0197968	0.0230657	0.0172448
																																												311.688	0.00839208	0.00279938	0.0195898	0.0227418	0.016673
																																												312.687	0.00831692	0.00280527	0.0193814	0.0225256	0.017161
																																												313.686	0.00820239	0.00280417	0.0191706	0.0221991	0.0165915
																																												314.685	0.00812696	0.00281019	0.018959	0.0219815	0.0170776
																																												315.684	0.00801378	0.00280928	0.0187457	0.0216543	0.0165117
																																												316.683	0.00793871	0.00281534	0.0185323	0.0214366	0.0169952
																																												317.682	0.0078275	0.00281456	0.018318	0.0211102	0.0164339
																																												318.681	0.00775338	0.00282058	0.0181043	0.020894	0.016914
																																												319.68	0.00764474	0.00281984	0.0178903	0.02057	0.0163585
																																												320.679	0.00757217	0.00282572	0.0176776	0.0203564	0.0168345
																																												321.678	0.00746666	0.00282495	0.0174653	0.0200364	0.0162855
																																												322.677	0.00739619	0.0028306	0.017255	0.0198268	0.0167569
																																												323.676	0.00729435	0.0028297	0.0170456	0.0195123	0.0162151
																																												324.675	0.00722655	0.00283502	0.0168388	0.0193079	0.0166813
																																												325.674	0.00712888	0.0028339	0.0166337	0.0190003	0.0161472
																																												326.673	0.0070643	0.0028388	0.0164316	0.0188024	0.0166077
																																												327.672	0.00697131	0.00283736	0.0162317	0.0185031	0.0160814
																																												328.671	0.00691045	0.00284173	0.0160355	0.0183129	0.0165361
																																												329.67	0.0068226	0.00283989	0.0158421	0.0180233	0.0160177
																																												330.669	0.006766	0.00284363	0.0156527	0.017842	0.0164662
																																												331.668	0.00668373	0.00284128	0.0154667	0.0175636	0.0159553
																																												332.667	0.00663187	0.00284429	0.0152853	0.0173923	0.0163976
																																												333.666	0.0065556	0.00284133	0.0151077	0.0171263	0.0158939
																																												334.665	0.00650895	0.0028435	0.0149351	0.0169663	0.0163299
																																												335.664	0.00643906	0.00283982	0.0147667	0.0167139	0.0158326
																																												336.663	0.00639807	0.00284105	0.0146037	0.0165663	0.0162622
																																												337.662	0.00633491	0.00283656	0.0144453	0.0163286	0.0157705
																																												338.661	0.00629999	0.00283675	0.0142928	0.0161944	0.0161939
																																												339.66	0.00624387	0.00283134	0.0141451	0.0159726	0.0157068
																																												340.659	0.00621539	0.00283038	0.0140036	0.0158528	0.0161239
																																												341.658	0.00616655	0.00282396	0.0138673	0.0156477	0.0156402
																																												342.657	0.00614482	0.00282176	0.0137373	0.015543	0.0160512
																																												343.656	0.00610346	0.00281423	0.0136128	0.0153553	0.0155695
																																												344.655	0.00608874	0.00281071	0.0134947	0.0152662	0.0159746
																																												345.654	0.00605499	0.00280199	0.0133824	0.0150964	0.0154934
																																												346.653	0.00604744	0.00279706	0.0132766	0.0150233	0.0158927
																																												347.652	0.00602134	0.00278707	0.0131765	0.0148714	0.0154107
																																												348.651	0.00602107	0.00278067	0.013083	0.0148142	0.0158043
																																												349.65	0.00600256	0.00276935	0.0129953	0.0146801	0.01532
																																												350.649	0.00600955	0.00276142	0.0129141	0.0146385	0.015708
																																												351.648	0.00599848	0.00274871	0.0128386	0.0145215	0.0152201
																																												352.647	0.00601263	0.00273921	0.0127694	0.0144947	0.0156027
																																												353.646	0.00600873	0.00272509	0.0127057	0.0143937	0.01511
																																												354.645	0.00602982	0.00271401	0.0126482	0.0143807	0.0154874
																																												355.644	0.00603272	0.00269845	0.0125958	0.0142943	0.0149889
																																												356.643	0.00606039	0.00268579	0.0125493	0.0142935	0.0153613
																																												357.642	0.00606958	0.00266881	0.0125075	0.01422	0.0148562
																																												358.641	0.00610338	0.00265458	0.012471	0.0142296	0.015224
																																												359.64	0.00611826	0.0026362	0.0124389	0.0141669	0.0147121
																																												360.639	0.00615759	0.00262045	0.0124116	0.0141849	0.0150756
																																												361.638	0.00617743	0.00260074	0.012388	0.0141307	0.0145567
																																												362.637	0.00622161	0.00258354	0.0123686	0.0141547	0.0149165
																																												363.636	0.0062456	0.00256256	0.0123523	0.0141067	0.0143912
																																												364.635	0.00629382	0.002544	0.0123395	0.0141345	0.0147477
																																												365.634	0.00632104	0.00252185	0.012329	0.0140903	0.0142167
																																												366.633	0.00637243	0.00250204	0.0123213	0.0141197	0.0145708
																																												367.632	0.00640193	0.00247884	0.0123151	0.0140769	0.0140353
																																												368.631	0.00645554	0.00245793	0.0123109	0.0141057	0.0143876
																																												369.63	0.00648631	0.00243383	0.0123074	0.0140623	0.0138492
																																												370.629	0.00654115	0.00241195	0.012305	0.0140886	0.0142006
																																												371.628	0.00657215	0.0023871	0.0123026	0.0140427	0.013661
																																												372.627	0.00662723	0.00236444	0.0123004	0.0140648	0.0140122
																																												373.626	0.00665745	0.002339	0.0122973	0.0140148	0.0134733
																																												374.625	0.00671176	0.00231573	0.0122938	0.0140313	0.0138251
																																												375.624	0.00674022	0.0022899	0.0122885	0.013976	0.013289
																																												376.623	0.00679279	0.00226621	0.012282	0.0139858	0.0136422
																																												377.622	0.00681854	0.00224017	0.012273	0.0139241	0.0131109
																																												378.621	0.00686846	0.00221625	0.0122621	0.0139265	0.0134661
																																												379.62	0.00689067	0.0021902	0.0122481	0.0138578	0.0129416
																																												380.619	0.00693709	0.00216624	0.0122315	0.0138521	0.0132992
																																												381.618	0.00695497	0.00214037	0.0122112	0.013776	0.0127833
																																												382.617	0.00699713	0.00211656	0.0121878	0.013762	0.0131436
																																												383.616	0.00701005	0.00209106	0.0121603	0.0136783	0.012638
																																												384.615	0.00704728	0.0020676	0.0121292	0.013656	0.0130012
																																												385.614	0.00705467	0.00204264	0.0120936	0.0135647	0.0125073
																																												386.613	0.00708643	0.0020197	0.012054	0.0135341	0.0128733
																																												387.612	0.00708786	0.00199546	0.0120098	0.0134355	0.0123925
																																												388.611	0.00711369	0.00197321	0.0119613	0.0133968	0.0127611
																																												389.61	0.00710885	0.00194985	0.011908	0.0132912	0.0122945
																																												390.609	0.0071284	0.00192845	0.0118504	0.0132448	0.0126653
																																												391.608	0.00711709	0.00190612	0.0117879	0.0131327	0.0122138
																																												392.607	0.00713012	0.00188571	0.0117211	0.013079	0.0125863
																																												393.606	0.00711223	0.00186455	0.0116494	0.012961	0.0121507
																																												394.605	0.00711859	0.00184526	0.0115735	0.0129006	0.0125243
																																												395.604	0.00709412	0.0018254	0.0114929	0.0127772	0.0121052
																																												396.603	0.00709377	0.00180735	0.0114082	0.0127106	0.0124793
																																												397.602	0.00706278	0.00178889	0.0113191	0.0125825	0.0120773
																																												398.601	0.00705575	0.00177218	0.0112261	0.0125102	0.0124509
																																												399.6	0.0070184	0.00175522	0.011129	0.0123781	0.0120666
																																												400.599	0.00700478	0.00173994	0.0110285	0.0123009	0.012439
																																												401.598	0.00696129	0.00172457	0.0109242	0.0121655	0.0120726
																																												402.597	0.00694123	0.0017108	0.0108167	0.0120839	0.0124429
																																												403.596	0.00689186	0.0016971	0.010706	0.0119459	0.012095
																																												404.595	0.00686558	0.00168491	0.0105926	0.0118606	0.0124624
																																												405.594	0.00681065	0.00167293	0.0104763	0.0117206	0.0121331
																																												406.593	0.0067784	0.00166238	0.0103579	0.0116323	0.0124967
																																												407.592	0.00671824	0.00165218	0.0102372	0.0114911	0.0121864
																																												408.591	0.00668031	0.00164331	0.0101148	0.0114003	0.0125453
																																												409.59	0.0066153	0.00163493	0.00999063	0.0112586	0.0122543
																																												410.589	0.00657201	0.0016278	0.00986538	0.011166	0.0126078
																																												411.588	0.00650254	0.00162127	0.00973894	0.0110243	0.0123362
																																												412.587	0.00645425	0.0016159	0.00961199	0.0109305	0.0126834
																																												413.586	0.00638071	0.00161126	0.00948443	0.0107895	0.0124315
																																												414.585	0.00632778	0.00160767	0.00935695	0.0106952	0.0127716
																																												415.584	0.00625061	0.00160493	0.00922948	0.0105554	0.0125395
																																												416.583	0.00619343	0.00160314	0.00910268	0.0104611	0.0128719
																																												417.582	0.00611305	0.00160232	0.0089765	0.0103232	0.0126596
																																												418.581	0.00605203	0.00160233	0.0088516	0.0102293	0.0129835
																																												419.58	0.00596888	0.00160343	0.00872793	0.0100938	0.0127911
																																												420.579	0.00590444	0.00160525	0.00860613	0.010001	0.0131058
																																												421.578	0.00581897	0.00160825	0.00848617	0.00986833	0.0129332
																																												422.577	0.00575155	0.00161187	0.00836867	0.00977717	0.0132382
																																												423.576	0.00566422	0.00161677	0.00825361	0.00964777	0.0130851
																																												424.575	0.00559429	0.00162217	0.00814157	0.00955868	0.0133798
																																												425.574	0.00550557	0.00162893	0.00803256	0.00943299	0.0132459
																																												426.573	0.00543359	0.00163608	0.00792711	0.00934645	0.0135298
																																												427.572	0.00534396	0.00164467	0.00782522	0.00922488	0.0134146
																																												428.571	0.00527045	0.00165352	0.00772743	0.00914134	0.0136872
																																												429.57	0.0051804	0.00166388	0.00763371	0.00902424	0.0135902
																																												430.569	0.00510586	0.00167438	0.00754456	0.00894412	0.0138509
																																												431.568	0.00501591	0.00168644	0.00745995	0.00883184	0.0137713
																																												432.567	0.00494088	0.00169852	0.00738035	0.00875557	0.0140198
																																												433.566	0.00485154	0.00171219	0.00730569	0.0086484	0.0139566
																																												434.565	0.00477658	0.00172575	0.00723642	0.00857637	0.0141926
																																												435.564	0.00468839	0.00174093	0.00717246	0.00847463	0.0141445
																																												436.563	0.00461407	0.00175587	0.00711419	0.00840722	0.0143676
																																												437.562	0.00452756	0.00177244	0.0070615	0.00831116	0.0143335
																																												438.561	0.00445446	0.00178862	0.00701475	0.00824875	0.0145433
																																												439.56	0.0043702	0.00180642	0.0069738	0.00815863	0.0145217
																																												440.559	0.00429892	0.0018237	0.00693893	0.00810154	0.0147179
																																												441.558	0.00421745	0.00184257	0.00690998	0.00801759	0.0147071
																																												442.557	0.00414857	0.00186077	0.00688719	0.00796617	0.0148894
																																												443.556	0.00407044	0.00188051	0.00687034	0.00788859	0.0148877
																																												444.555	0.00400456	0.00189944	0.00685963	0.00784311	0.0150557
																																												445.554	0.00393029	0.00191985	0.00685479	0.00777208	0.0150612
																																												446.553	0.00386798	0.00193928	0.00685597	0.00773281	0.0152149
																																												447.552	0.00379809	0.00196012	0.00686286	0.00766846	0.0152256
																																												448.551	0.00373987	0.00197983	0.00687556	0.00763558	0.0153645
																																												449.55	0.00367483	0.00200085	0.00689371	0.00757801	0.0153785
																																												450.549	0.00362122	0.00202058	0.00691735	0.00755168	0.0155026
																																												451.548	0.00356145	0.00204152	0.00694608	0.00750091	0.0155178
																																												452.547	0.00351289	0.002061	0.00697991	0.0074812	0.0156268
																																												453.546	0.00345874	0.00208158	0.00701838	0.00743719	0.0156413
																																												454.545	0.00341561	0.00210054	0.00706147	0.00742408	0.0157352
																																												455.544	0.00336738	0.00212047	0.00710867	0.00738671	0.0157472
																																												456.543	0.00332997	0.00213864	0.00715993	0.0073801	0.0158259
																																												457.542	0.00328786	0.00215765	0.00721472	0.00734914	0.0158338
																																												458.541	0.00325638	0.00217474	0.00727294	0.00734881	0.0158973
																																												459.54	0.0032205	0.00219255	0.00733404	0.00732396	0.0158996
																																												460.539	0.00319505	0.0022083	0.00739792	0.00732957	0.015948
																																												461.538	0.00316541	0.00222466	0.00746397	0.0073104	0.0159435
																																												462.537	0.00314599	0.00223882	0.0075321	0.00732149	0.015977
																																												463.536	0.0031225	0.00225347	0.00760169	0.00730748	0.0159648
																																												464.535	0.00310899	0.00226581	0.00767264	0.00732348	0.0159837
																																												465.534	0.00309145	0.00227854	0.00774432	0.007314	0.015963
																																												466.533	0.00308365	0.00228886	0.00781665	0.00733422	0.0159678
																																												467.532	0.00307176	0.00229948	0.00788898	0.00732853	0.0159383
																																												468.531	0.00306935	0.00230761	0.00796125	0.00735219	0.0159294
																																												469.53	0.00306272	0.00231597	0.00803283	0.00734949	0.015891
																																												470.529	0.0030653	0.00232178	0.00810366	0.00737572	0.0158691
																																												471.528	0.00306347	0.00232777	0.00817313	0.00737514	0.0158218
																																												472.527	0.00307056	0.00233116	0.0082412	0.007403	0.0157875
																																												473.526	0.00307299	0.00233471	0.00830728	0.00740364	0.0157318
																																												474.525	0.00308406	0.00233562	0.00837137	0.00743217	0.015686
																																												475.524	0.00309018	0.0023367	0.00843289	0.00743311	0.0156223
																																												476.523	0.00310464	0.00233512	0.00849187	0.00746133	0.0155658
																																												477.522	0.00311384	0.00233373	0.00854777	0.00746169	0.0154949
																																												478.521	0.00313108	0.00232968	0.00860064	0.00748864	0.0154286
																																												479.52	0.00314275	0.00232587	0.00864998	0.00748754	0.0153514
																																												480.519	0.00316216	0.00231941	0.00869585	0.0075123	0.0152761
																																												481.518	0.00317568	0.00231327	0.0087378	0.00750895	0.0151934
																																												482.517	0.00319665	0.00230449	0.00877593	0.00753068	0.0151101
																																												483.516	0.00321144	0.00229611	0.0088098	0.00752436	0.0150231
																																												484.515	0.00323338	0.00228513	0.00883955	0.00754228	0.0149326
																																												485.514	0.00324889	0.00227467	0.00886478	0.00753236	0.0148422
																																												486.513	0.00327124	0.00226163	0.00888564	0.00754581	0.0147454
																																												487.512	0.00328694	0.00224923	0.00890178	0.00753175	0.0146526
																																												488.511	0.00330921	0.0022343	0.00891338	0.00754016	0.0145504
																																												489.51	0.00332464	0.00222014	0.00892011	0.00752156	0.0144562
																																												490.509	0.00334636	0.00220349	0.00892216	0.00752445	0.0143494
																																												491.508	0.00336111	0.00218776	0.00891925	0.00750099	0.0142548
																																												492.507	0.00338188	0.00216959	0.00891159	0.00749803	0.0141441
																																												493.506	0.00339559	0.00215248	0.00889893	0.00746949	0.0140501
																																												494.505	0.00341505	0.00213298	0.0088815	0.00746042	0.0139362
																																												495.504	0.00342742	0.0021147	0.00885907	0.0074267	0.0138436
																																												496.503	0.00344528	0.00209405	0.00883188	0.00741138	0.0137272
																																												497.502	0.00345607	0.0020748	0.00879976	0.00737245	0.0136368
																																												498.501	0.00347208	0.00205323	0.00876293	0.00735083	0.0135186
																																												499.5	0.0034811	0.00203321	0.00872127	0.00730676	0.0134313
																																												500.5	0.00349507	0.0020109	0.008675	0.0072789	0.0133118
																																												501.499	0.00350217	0.0019903	0.00862404	0.00722983	0.0132284
																																												502.498	0.00351395	0.00196746	0.00856862	0.00719586	0.0131081
																																												503.497	0.00351904	0.00194649	0.00850869	0.00714202	0.0130293
																																												504.496	0.00352851	0.0019233	0.00844447	0.00710215	0.0129087
																																												505.495	0.00353153	0.00190214	0.00837596	0.00704383	0.0128353
																																												506.494	0.00353863	0.00187879	0.0083034	0.00699836	0.0127149
																																												507.493	0.00353954	0.00185763	0.00822681	0.00693592	0.0126476
																																												508.492	0.00354425	0.00183431	0.00814643	0.00688522	0.0125279
																																												509.491	0.00354306	0.00181332	0.00806232	0.00681907	0.0124674
																																												510.49	0.00354535	0.0017902	0.00797473	0.00676359	0.0123488
																																												511.489	0.0035421	0.00176955	0.00788376	0.00669421	0.0122959
																																												512.488	0.003542	0.00174681	0.00778967	0.00663445	0.0121786
																																												513.487	0.00353673	0.00172667	0.00769258	0.00656238	0.012134
																																												514.486	0.00353429	0.00170447	0.00759277	0.00649891	0.0120186
																																												515.485	0.00352706	0.001685	0.00749042	0.00642474	0.0119831
																																												516.484	0.00352233	0.0016635	0.00738578	0.00635821	0.0118698
																																												517.483	0.00351324	0.00164486	0.00727908	0.00628256	0.011844
																																												518.482	0.0035063	0.0016242	0.00717058	0.00621366	0.0117332
																																												519.481	0.00349543	0.00160654	0.00706056	0.00613722	0.0117179
																																												520.48	0.00348638	0.0015869	0.00694928	0.0060667	0.0116098
																																												521.479	0.00347384	0.00157035	0.00683703	0.00599017	0.0116058
																																												522.478	0.00346277	0.00155186	0.00672412	0.00591881	0.0115005
																																												523.477	0.00344867	0.00153657	0.00661085	0.00584296	0.0115084
																																												524.476	0.00343569	0.00151937	0.00649751	0.00577158	0.0114062
																																												525.475	0.00342014	0.00150548	0.00638447	0.00569715	0.0114266
																																												526.474	0.00340536	0.00148971	0.00627201	0.00562658	0.0113276
																																												527.473	0.00338849	0.00147735	0.00616049	0.00555436	0.0113612
																																												528.472	0.00337204	0.00146314	0.00605022	0.00548545	0.0112654
																																												529.471	0.00335396	0.00145243	0.00594157	0.0054162	0.0113126
																																												530.47	0.00333597	0.00143991	0.00583483	0.00534977	0.01122
																																												531.469	0.00331681	0.00143098	0.00573038	0.00528423	0.0112814
																																												532.468	0.00329741	0.00142026	0.00562848	0.00522109	0.0111918
																																												533.467	0.00327729	0.00141321	0.00552954	0.00515994	0.0112677
																																												534.466	0.00325661	0.00140442	0.00543377	0.00510085	0.0111811
																																												535.465	0.00323567	0.00139936	0.00534157	0.00504474	0.0112716
																																												536.464	0.00321387	0.00139259	0.00525313	0.00499038	0.0111877
																																												537.463	0.00319223	0.00138962	0.00516881	0.00493988	0.0112932
																																												538.462	0.00316945	0.00138496	0.00508878	0.00489085	0.0112116
																																												539.461	0.00314726	0.00138418	0.00501336	0.00484643	0.0113321
																																												540.46	0.00312366	0.00138171	0.00494268	0.00480325	0.0112526
																																												541.459	0.00310106	0.00138318	0.00487701	0.00476526	0.011388
																																												542.458	0.00307681	0.00138297	0.00481643	0.00472834	0.0113101
																																												543.457	0.00305396	0.00138675	0.00476117	0.00469704	0.0114604
																																												544.456	0.00302923	0.00138886	0.00471125	0.00466664	0.0113837
																																												545.455	0.0030063	0.00139499	0.00466685	0.00464216	0.0115487
																																												546.454	0.00298128	0.00139943	0.00462795	0.00461844	0.0114728
																																												547.453	0.00295844	0.00140794	0.00459465	0.00460079	0.0116521
																																												548.452	0.00293335	0.00141473	0.00456688	0.00458378	0.0115765
																																												549.451	0.00291079	0.00142561	0.0045447	0.00457283	0.01177
																																												550.45	0.00288584	0.00143473	0.00452797	0.00456243	0.0116942
																																												551.449	0.00286376	0.00144795	0.00451669	0.00455795	0.0119015
																																												552.448	0.00283918	0.00145936	0.00451069	0.00455394	0.011825
																																												553.447	0.00281779	0.00147487	0.00450992	0.0045556	0.0120458
																																												554.446	0.00279382	0.00148849	0.00451416	0.00455764	0.0119683
																																												555.445	0.00277333	0.00150621	0.00452331	0.00456499	0.0122021
																																												556.444	0.00275019	0.00152193	0.00453711	0.00457266	0.0121231
																																												557.443	0.00273082	0.00154173	0.00455544	0.00458519	0.0123696
																																												558.442	0.00270877	0.00155943	0.00457801	0.00459797	0.0122887
																																												559.441	0.00269073	0.00158116	0.00460465	0.00461508	0.0125476
																																												560.44	0.00266997	0.00160065	0.00463506	0.0046324	0.0124643
																																												561.439	0.00265344	0.00162413	0.00466906	0.00465346	0.0127353
																																												562.438	0.00263418	0.00164521	0.00470632	0.00467469	0.0126494
																																												563.437	0.00261934	0.00167021	0.00474666	0.00469903	0.0129321
																																												564.436	0.00260175	0.00169265	0.00478974	0.00472349	0.0128433
																																												565.435	0.00258874	0.00171893	0.00483537	0.00475044	0.0131374
																																												566.434	0.00257294	0.00174246	0.00488323	0.00477745	0.0130454
																																												567.433	0.00256185	0.00176975	0.0049331	0.00480632	0.0133507
																																												568.432	0.00254795	0.00179408	0.00498468	0.00483519	0.0132551
																																												569.431	0.00253883	0.00182207	0.00503777	0.00486532	0.0135713
																																												570.43	0.00252686	0.00184689	0.00509207	0.00489539	0.0134719
																																												571.429	0.00251971	0.00187526	0.00514739	0.00492615	0.0137989
																																												572.428	0.00250967	0.00190025	0.00520346	0.00495676	0.0136954
																																												573.427	0.00250447	0.00192869	0.00526009	0.00498756	0.014033
																																												574.426	0.0024963	0.00195352	0.00531703	0.0050181	0.0139252
																																												575.425	0.00249295	0.00198169	0.00537411	0.00504839	0.0142731
																																												576.424	0.00248656	0.00200602	0.00543111	0.00507831	0.0141607
																																												577.423	0.00248494	0.00203359	0.00548787	0.00510759	0.0145187
																																												578.422	0.0024802	0.00205711	0.00554418	0.00513637	0.0144015
																																												579.421	0.00248017	0.00208378	0.00559992	0.00516423	0.0147694
																																												580.42	0.00247691	0.00210618	0.0056549	0.00519142	0.0146471
																																												581.419	0.00247829	0.00213164	0.005709	0.00521749	0.0150247
																																												582.418	0.00247633	0.00215264	0.00576207	0.00524268	0.014897
																																												583.417	0.00247894	0.00217663	0.005814	0.00526666	0.0152839
																																												584.416	0.0024781	0.00219597	0.00586466	0.00528953	0.0151506
																																												585.415	0.00248175	0.00221825	0.00591396	0.00531117	0.0155464
																																												586.414	0.00248184	0.00223573	0.00596178	0.00533144	0.0154071
																																												587.413	0.00248633	0.00225609	0.00600806	0.00535057	0.0158115
																																												588.412	0.00248716	0.00227151	0.00605269	0.00536802	0.0156658
																																												589.411	0.00249232	0.00228981	0.00609563	0.00538452	0.0160781
																																												590.41	0.00249371	0.00230304	0.00613676	0.00539901	0.0159256
																																												591.409	0.00249938	0.00231914	0.00617609	0.0054128	0.0163453
																																												592.408	0.00250118	0.00233009	0.00621348	0.00542422	0.0161855
																																												593.407	0.00250721	0.00234392	0.00624898	0.0054353	0.0166116
																																												594.406	0.00250928	0.00235253	0.00628244	0.0054436	0.0164441
																																												595.405	0.00251554	0.00236406	0.00631393	0.00545199	0.0168758
																																												596.404	0.00251776	0.00237032	0.00634331	0.00545718	0.0167
																																												597.403	0.00252417	0.00237955	0.00637064	0.00546296	0.017136
																																												598.402	0.00252644	0.00238348	0.00639581	0.00546508	0.0169512
																																												599.401	0.0025329	0.00239046	0.00641888	0.00546835	0.0173903
																																												600.4	0.00253517	0.00239214	0.00643973	0.0054675	0.0171957
																																												601.399	0.00254164	0.00239694	0.00645847	0.00546842	0.0176365
																																												602.398	0.00254384	0.00239647	0.00647493	0.00546472	0.0174312
																																												603.397	0.00255029	0.0023992	0.00648925	0.00546347	0.0178719
																																												604.396	0.00255241	0.00239669	0.00650127	0.0054571	0.0176551
																																												605.395	0.00255883	0.00239749	0.00651114	0.00545389	0.0180939
																																												606.394	0.00256087	0.0023931	0.00651867	0.00544504	0.0178645
																																												607.393	0.00256727	0.00239213	0.00652404	0.0054401	0.0182992
																																												608.392	0.00256925	0.00238603	0.00652705	0.00542902	0.0180562
																																												609.391	0.00257566	0.00238345	0.0065279	0.00542261	0.0184848
																																												610.39	0.00257762	0.00237584	0.00652637	0.00540955	0.018227
																																												611.389	0.0025841	0.00237185	0.00652269	0.00540195	0.0186469
																																												612.388	0.00258608	0.00236292	0.00651661	0.00538721	0.0183732
																																												613.387	0.00259271	0.00235772	0.00650839	0.00537873	0.0187821
																																												614.386	0.00259478	0.00234768	0.00649777	0.00536261	0.0184914
																																												615.385	0.00260162	0.00234148	0.00648502	0.00535355	0.0188869
																																												616.384	0.00260386	0.00233055	0.00646988	0.00533638	0.0185781
																																												617.383	0.00261101	0.00232356	0.00645263	0.00532707	0.0189578
																																												618.382	0.00261352	0.00231195	0.006433	0.00530921	0.0186301
																																												619.381	0.00262106	0.00230439	0.00641129	0.00529998	0.0189918
																																												620.38	0.00262392	0.00229232	0.00638722	0.00528178	0.0186445
																																												621.379	0.00263197	0.00228439	0.00636113	0.00527298	0.0189863
																																												622.378	0.00263529	0.00227209	0.00633271	0.00525479	0.018619
																																												623.377	0.00264393	0.00226401	0.00630233	0.00524675	0.0189392
																																												624.376	0.0026478	0.00225169	0.00626969	0.00522895	0.018552
																																												625.375	0.00265715	0.00224366	0.00623516	0.00522201	0.0188496
																																												626.374	0.00266166	0.00223152	0.00619845	0.00520496	0.018443
																																												627.373	0.00267181	0.00222374	0.00615996	0.00519945	0.0187172
																																												628.372	0.00267704	0.00221198	0.0061194	0.00518349	0.0182921
																																												629.371	0.00268807	0.00220466	0.00607719	0.00517973	0.0185432
																																												630.37	0.00269411	0.00219347	0.00603304	0.00516521	0.0181012
																																												631.369	0.0027061	0.00218678	0.0059874	0.00516349	0.0183297
																																												632.368	0.00271299	0.00217636	0.00594	0.00515072	0.0178727
																																												633.367	0.002726	0.00217049	0.00589131	0.00515131	0.0180801
																																												634.366	0.0027338	0.002161	0.00584106	0.00514058	0.0176107
																																												635.365	0.00274787	0.00215611	0.00578974	0.00514374	0.0177989
																																												636.364	0.00275659	0.00214773	0.00573712	0.00513531	0.01732
																																												637.363	0.00277174	0.00214399	0.00568369	0.00514124	0.0174914
																																												638.362	0.0027814	0.00213686	0.00562924	0.00513532	0.0170063
																																												639.361	0.00279762	0.00213442	0.0055743	0.0051442	0.0171639
																																												640.36	0.0028082	0.0021287	0.00551864	0.00514097	0.0166761
																																												641.359	0.00282548	0.0021277	0.00546282	0.00515293	0.016823
																																												642.358	0.00283691	0.00212351	0.00540664	0.00515253	0.0163361
																																												643.357	0.0028552	0.00212408	0.00535065	0.00516766	0.0164757
																																												644.356	0.00286744	0.00212156	0.00529468	0.00517017	0.0159932
																																												645.355	0.00288665	0.00212381	0.00523928	0.0051885	0.0161288
																																												646.354	0.00289959	0.00212306	0.00518429	0.00519395	0.0156542
																																												647.353	0.00291963	0.00212712	0.00513026	0.00521547	0.0157889
																																												648.352	0.00293316	0.00212823	0.00507705	0.00522385	0.0153254
																																												649.351	0.00295391	0.00213418	0.00502517	0.00524852	0.0154622
																																												650.35	0.00296789	0.00213724	0.00497451	0.00525975	0.0150125
																																												651.349	0.00298921	0.00214517	0.00492556	0.00528747	0.0151541
																																												652.348	0.00300349	0.00215026	0.0048782	0.00530145	0.0147207
																																												653.347	0.00302522	0.00216023	0.00483292	0.00533206	0.0148693
																																												654.346	0.00303963	0.00216739	0.00478956	0.00534862	0.0144542
																																												655.345	0.0030616	0.00217947	0.0047486	0.00538195	0.0146117
																																												656.344	0.00307596	0.00218874	0.00470987	0.00540088	0.0142166
																																												657.343	0.003098	0.00220295	0.00467381	0.00543671	0.0143845
																																												658.342	0.00311213	0.00221435	0.00464025	0.00545778	0.0140105
																																												659.341	0.00313407	0.00223072	0.00460956	0.00549585	0.01419
																																												660.34	0.00314778	0.00224426	0.00458158	0.00551879	0.0138379
																																												661.339	0.00316944	0.00226279	0.00455664	0.00555882	0.0140299
																																												662.338	0.00318257	0.00227845	0.00453453	0.00558333	0.0137002
																																												663.337	0.0032038	0.00229912	0.00451557	0.00562503	0.0139052
																																												664.336	0.0032162	0.00231686	0.00449952	0.00565078	0.0135981
																																												665.335	0.00323683	0.00233962	0.00448665	0.00569383	0.0138164
																																												666.334	0.00324836	0.00235939	0.00447671	0.00572049	0.0135319
																																												667.333	0.00326829	0.00238418	0.00446992	0.00576457	0.0137637
																																												668.332	0.00327884	0.00240589	0.00446603	0.0057918	0.0135016
																																												669.331	0.00329796	0.00243262	0.00446522	0.00583656	0.013747
																																												670.33	0.00330743	0.00245616	0.00446721	0.00586401	0.0135068
																																												671.329	0.00332567	0.00248471	0.00447216	0.00590913	0.0137657
																																												672.328	0.00333402	0.00250994	0.00447978	0.00593643	0.0135469
																																												673.327	0.00335132	0.00254018	0.0044902	0.00598157	0.0138193
																																												674.326	0.00335851	0.00256694	0.00450312	0.0060084	0.0136212
																																												675.325	0.00337487	0.0025987	0.00451866	0.00605323	0.0139071
																																												676.324	0.00338089	0.0026268	0.0045365	0.00607923	0.013729
																																												677.323	0.00339629	0.00265987	0.00455676	0.00612344	0.0140284
																																												678.322	0.00340116	0.00268909	0.00457911	0.00614829	0.0138695
																																												679.321	0.00341561	0.00272325	0.00460366	0.00619156	0.0141823
																																												680.32	0.00341936	0.00275335	0.00463009	0.00621493	0.0140418
																																												681.319	0.00343289	0.00278834	0.00465849	0.00625697	0.0143682
																																												682.318	0.00343554	0.00281904	0.00468856	0.00627856	0.0142451
																																												683.317	0.00344818	0.00285459	0.00472038	0.00631907	0.0145853
																																												684.316	0.00344977	0.0028856	0.00475365	0.00633861	0.0144788
																																												685.315	0.00346153	0.00292139	0.00478847	0.00637732	0.014833
																																												686.314	0.00346208	0.00295239	0.00482455	0.00639452	0.0147422
																																												687.313	0.00347298	0.00298811	0.00486197	0.00643117	0.0151106
																																												688.312	0.00347252	0.00301876	0.00490046	0.00644577	0.0150345
																																												689.311	0.00348255	0.00305405	0.00494012	0.00648012	0.0154176
																																												690.31	0.00348107	0.00308399	0.00498067	0.00649189	0.0153552
																																												691.309	0.00349021	0.00311851	0.00502224	0.0065237	0.0157534
																																												692.308	0.0034877	0.00314738	0.00506455	0.00653242	0.0157037
																																												693.307	0.00349592	0.00318074	0.00510773	0.00656146	0.0161176
																																												694.306	0.00349235	0.00320817	0.00515153	0.00656692	0.0160796
																																												695.305	0.0034996	0.00324	0.00519608	0.00659299	0.0165095
																																												696.304	0.00349491	0.00326563	0.00524112	0.00659501	0.0164822
																																												697.303	0.00350112	0.00329556	0.00528682	0.00661792	0.0169287
																																												698.302	0.00349527	0.00331901	0.00533292	0.00661632	0.0169109
																																												699.301	0.00350036	0.00334669	0.0053796	0.00663588	0.0173745
																																												700.3	0.00349328	0.00336762	0.0054266	0.00663051	0.0173652
																																												701.299	0.00349717	0.00339269	0.00547411	0.00664654	0.0178462
																																												702.298	0.00348879	0.00341076	0.00552189	0.00663728	0.0178441
																																												703.297	0.0034914	0.0034329	0.00557012	0.00664963	0.018343
																																												704.296	0.00348165	0.00344782	0.00561857	0.00663634	0.0183468
																																												705.295	0.0034829	0.00346673	0.00566746	0.00664488	0.0188637
																																												706.294	0.00347172	0.00347823	0.00571652	0.00662747	0.0188722
																																												707.293	0.00347152	0.00349364	0.00576598	0.00663207	0.019407
																																												708.292	0.00345887	0.00350149	0.0058156	0.00661046	0.0194187
																																												709.291	0.00345716	0.00351319	0.00586562	0.006611	0.0199712
																																												710.29	0.00344299	0.0035172	0.00591576	0.00658514	0.0199846
																																												711.289	0.00343973	0.00352502	0.0059663	0.00658155	0.0205542
																																												712.288	0.00342401	0.00352506	0.00601695	0.00655141	0.0205675
																																												713.287	0.00341916	0.00352886	0.00606799	0.00654362	0.0211534
																																												714.286	0.00340189	0.00352483	0.00611913	0.00650919	0.0211648
																																												715.285	0.00339543	0.00352454	0.00617066	0.00649715	0.0217657
																																												716.284	0.00337664	0.00351643	0.00622227	0.00645846	0.021773
																																												717.283	0.00336857	0.00351203	0.00627428	0.00644217	0.022387
																																												718.282	0.00334829	0.00349985	0.00632635	0.00639928	0.022388
																																												719.281	0.00333865	0.00349136	0.00637881	0.00637876	0.0230129
																																												720.28	0.00331694	0.00347519	0.00643132	0.00633175	0.023005
																																												721.279	0.0033058	0.0034627	0.00648421	0.00630706	0.0236378
																																												722.278	0.00328275	0.00344266	0.00653711	0.00625606	0.0236181
																																												723.277	0.00327017	0.0034263	0.00659038	0.0062273	0.0242553
																																												724.276	0.00324589	0.00340257	0.00664362	0.00617248	0.0242208
																																												725.275	0.00323199	0.00338251	0.0066972	0.00613977	0.0248582
																																												726.274	0.00320664	0.00335531	0.0067507	0.00608134	0.0248055
																																												727.273	0.00319155	0.00333178	0.0068045	0.00604487	0.0254383
																																												728.272	0.00316528	0.00330136	0.00685815	0.00598308	0.0253639
																																												729.271	0.00314917	0.00327461	0.00691205	0.00594308	0.0259866
																																												730.27	0.00312217	0.00324127	0.00696573	0.00587823	0.0258867
																																												731.269	0.00310522	0.0032116	0.00701957	0.00583496	0.0264933
																																												732.268	0.00307771	0.00317564	0.0070731	0.00576738	0.0263642
																																												733.267	0.00306012	0.00314336	0.00712671	0.00572116	0.0269483
																																												734.266	0.00303232	0.00310514	0.00717989	0.00565124	0.0267862
																																												735.265	0.00301432	0.00307059	0.00723303	0.00560244	0.0273412
																																												736.264	0.00298647	0.00303046	0.00728562	0.0055306	0.0271426
																																												737.263	0.00296831	0.00299398	0.00733805	0.00547961	0.0276618
																																												738.262	0.00294066	0.00295231	0.00738976	0.00540631	0.0274238
																																												739.261	0.00292257	0.00291427	0.00744118	0.00535358	0.0279006
																																												740.26	0.00289538	0.00287142	0.0074917	0.0052793	0.0276207
																																												741.259	0.00287762	0.00283219	0.00754177	0.00522531	0.0280493
																																												742.258	0.00285113	0.00278854	0.00759076	0.00515057	0.0277258
																																												743.257	0.00283395	0.00274847	0.00763911	0.00509582	0.0281011
																																												744.256	0.00280841	0.00270438	0.00768619	0.00502115	0.0277335
																																												745.255	0.00279204	0.00266383	0.00773243	0.00496617	0.0280514
																																												746.254	0.00276769	0.00261966	0.00777719	0.00489211	0.0276401
																																												747.253	0.00275237	0.00257899	0.0078209	0.00483743	0.027898
																																												748.252	0.00272942	0.00253508	0.00786291	0.00476453	0.0274448
																																												749.251	0.00271536	0.00249462	0.00790366	0.00471069	0.0276416
																																												750.25	0.002694	0.0024513	0.00794249	0.00463948	0.0271494
																																												751.249	0.00268139	0.00241137	0.00797985	0.00458701	0.0272854
																																												752.248	0.0026618	0.00236894	0.00801505	0.00451803	0.0267583
																																												753.247	0.0026508	0.00232985	0.00804858	0.00446745	0.0268356
																																												754.246	0.00263312	0.00228862	0.00807974	0.00440117	0.0262789
																																												755.245	0.00262388	0.00225065	0.00810902	0.00435299	0.0263009
																																												756.244	0.00260822	0.00221087	0.00813573	0.00428989	0.0257204
																																												757.243	0.00260086	0.00217429	0.00816038	0.00424455	0.0256919
																																												758.242	0.0025873	0.00213622	0.00818228	0.00418506	0.0250941
																																												759.241	0.00258189	0.00210128	0.00820196	0.004143	0.0250209
																																												760.24	0.00257049	0.00206513	0.00821873	0.00408748	0.0244127
																																												761.239	0.00256711	0.00203205	0.00823313	0.00404909	0.0243011
																																												762.238	0.00255789	0.00199805	0.00824452	0.00399787	0.0236894
																																												763.237	0.00255655	0.00196703	0.00825343	0.00396347	0.0235463
																																												764.236	0.00254952	0.00193534	0.00825925	0.00391682	0.0229376
																																												765.235	0.00255022	0.00190656	0.00826253	0.00388669	0.02277
																																												766.234	0.00254535	0.00187735	0.00826268	0.00384483	0.0221704
																																												767.233	0.00254808	0.00185098	0.00826026	0.0038192	0.0219851
																																												768.232	0.00254532	0.00182439	0.00825471	0.00378228	0.0214003
																																												769.231	0.00255003	0.00180057	0.00824662	0.00376131	0.0212036
																																												770.23	0.00254932	0.00177672	0.00823546	0.00372943	0.0206384
																																												771.229	0.00255595	0.00175557	0.00822181	0.00371324	0.0204362
																																												772.228	0.00255719	0.00173455	0.00820519	0.00368643	0.0198947
																																												773.227	0.00256567	0.00171617	0.00818618	0.00367507	0.0196923
																																												774.226	0.00256877	0.00169808	0.00816435	0.00365334	0.0191778
																																												775.225	0.002579	0.00168255	0.00814029	0.00364682	0.0189797
																																												776.224	0.00258385	0.00166744	0.00811357	0.0036301	0.0184947
																																												777.223	0.00259573	0.00165484	0.00808479	0.00362839	0.0183048
																																												778.222	0.00260221	0.00164276	0.00805358	0.00361657	0.0178511
																																												779.221	0.00261563	0.00163313	0.00802052	0.00361959	0.0176727
																																												780.22	0.00262362	0.00162411	0.00798527	0.00361254	0.0172514
																																												781.219	0.00263847	0.00161748	0.00794839	0.00362017	0.017087
																																												782.218	0.00264784	0.00161154	0.00790958	0.00361771	0.0166987
																																												783.217	0.00266399	0.00160793	0.00786939	0.00362981	0.0165505
																																												784.216	0.00267461	0.00160506	0.00782755	0.00363175	0.0161953
																																												785.215	0.00269194	0.00160448	0.00778458	0.00364814	0.0160647
																																												786.214	0.0027037	0.00160467	0.00774023	0.00365425	0.0157423
																																												787.213	0.00272208	0.00160709	0.007695	0.00367474	0.0156306
																																												788.212	0.00273484	0.00161031	0.00764867	0.00368478	0.0153403
																																												789.211	0.00275417	0.0016157	0.00760172	0.00370917	0.0152485
																																												790.21	0.00276781	0.00162191	0.00755392	0.0037229	0.0149894
																																												791.209	0.00278795	0.00163023	0.00750574	0.00375096	0.014918
																																												792.208	0.00280236	0.00163936	0.00745698	0.00376812	0.0146891
																																												793.207	0.0028232	0.00165056	0.00740806	0.00379964	0.0146385
																																												794.206	0.00283825	0.00166254	0.00735878	0.00381997	0.0144386
																																												795.205	0.00285968	0.00167654	0.00730955	0.00385471	0.014409
																																												796.204	0.00287527	0.00169129	0.0072602	0.00387797	0.0142368
																																												797.203	0.00289718	0.00170799	0.00721107	0.00391571	0.0142285
																																												798.202	0.00291319	0.0017254	0.00716201	0.00394162	0.0140826
																																												799.201	0.00293546	0.00174471	0.00711335	0.00398213	0.0140957
																																												800.2	0.0029518	0.00176467	0.00706494	0.00401047	0.0139748
																																												801.199	0.00297432	0.00178648	0.00701707	0.00405353	0.0140093
																																												802.198	0.00299088	0.00180885	0.0069696	0.00408405	0.0139119
																																												803.197	0.00301354	0.00183302	0.0069228	0.00412945	0.013968
																																												804.196	0.00303021	0.00185766	0.00687654	0.00416192	0.0138928
																																												805.195	0.00305292	0.00188404	0.00683106	0.00420944	0.0139705
																																												806.194	0.0030696	0.0019108	0.00678624	0.00424365	0.0139161
																																												807.193	0.00309224	0.00193923	0.0067423	0.00429308	0.0140156
																																												808.192	0.00310884	0.00196792	0.00669911	0.00432882	0.0139806
																																												809.191	0.0031313	0.00199823	0.00665689	0.00437997	0.014102
																																												810.19	0.00314771	0.00202868	0.0066155	0.00441703	0.014085
																																												811.189	0.00316989	0.00206067	0.00657515	0.00446972	0.0142286
																																												812.188	0.00318601	0.00209267	0.00653572	0.00450791	0.0142284
																																												813.187	0.0032078	0.00212615	0.00649738	0.00456194	0.0143944
																																												814.186	0.00322353	0.00215948	0.00646002	0.00460108	0.0144097
																																												815.185	0.00324483	0.00219424	0.00642381	0.00465629	0.0145982
																																												816.184	0.00326007	0.00222867	0.00638865	0.0046962	0.0146277
																																												817.183	0.00328078	0.00226447	0.00635467	0.00475239	0.014839
																																												818.182	0.00329543	0.00229977	0.00632179	0.00479291	0.0148815
																																												819.181	0.00331544	0.00233638	0.00629015	0.00484992	0.015116
																																												820.18	0.00332939	0.0023723	0.00625965	0.00489087	0.0151702
																																												821.179	0.00334861	0.00240946	0.00623043	0.00494853	0.0154281
																																												822.178	0.00336178	0.00244574	0.0062024	0.00498976	0.0154928
																																												823.177	0.0033801	0.00248321	0.00617567	0.0050479	0.0157742
																																												824.176	0.00339238	0.00251959	0.00615019	0.00508925	0.0158483
																																												825.175	0.00340971	0.0025571	0.00612605	0.00514769	0.0161534
																																												826.174	0.00342103	0.0025933	0.00610318	0.005189	0.0162355
																																												827.173	0.00343726	0.00263059	0.0060817	0.00524757	0.0165644
																																												828.172	0.00344752	0.00266635	0.00606154	0.00528869	0.0166534
																																												829.171	0.00346259	0.00270315	0.00604279	0.00534722	0.0170061
																																												830.17	0.0034717	0.00273819	0.00602541	0.00538798	0.0171007
																																												831.169	0.00348551	0.00277423	0.00600947	0.0054463	0.0174769
																																												832.168	0.0034934	0.0028083	0.00599493	0.00548655	0.0175758
																																												833.167	0.00350588	0.00284332	0.00598188	0.00554446	0.0179753
																																												834.166	0.00351248	0.00287615	0.00597027	0.00558405	0.0180772
																																												835.165	0.00352355	0.00290989	0.00596017	0.00564138	0.0184994
																																												836.164	0.00352879	0.00294124	0.00595155	0.00568014	0.018603
																																												837.163	0.00353839	0.00297346	0.00594448	0.0057367	0.0190471
																																												838.162	0.00354223	0.00300308	0.00593892	0.00577447	0.0191511
																																												839.161	0.00355031	0.00303356	0.00593495	0.00583007	0.019616
																																												840.16	0.0035527	0.00306125	0.00593251	0.00586669	0.0197188
																																												841.159	0.00355922	0.00308976	0.00593169	0.00592115	0.0202034
																																												842.158	0.00356013	0.00311531	0.00593244	0.00595644	0.0203036
																																												843.157	0.00356505	0.00314166	0.00593483	0.00600957	0.0208062
																																												844.156	0.00356447	0.0031649	0.00593882	0.00604339	0.0209021
																																												845.155	0.00356777	0.00318893	0.00594447	0.006095	0.021421
																																												846.154	0.0035657	0.00320971	0.00595174	0.0061272	0.021511
																																												847.153	0.00356739	0.00323127	0.00596069	0.0061771	0.0220438
																																												848.152	0.00356384	0.00324946	0.00597127	0.00620752	0.0221262
																																												849.151	0.00356393	0.00326843	0.00598354	0.00625554	0.0226706
																																												850.15	0.00355895	0.00328396	0.00599746	0.00628405	0.0227438
																																												851.149	0.00355748	0.00330026	0.00601307	0.00633003	0.0232967
																																												852.148	0.00355111	0.00331305	0.00603033	0.00635649	0.023359
																																												853.147	0.00354815	0.00332663	0.00604929	0.00640027	0.0239175
																																												854.146	0.00354048	0.00333666	0.00606989	0.00642458	0.0239672
																																												855.145	0.00353608	0.00334748	0.00609218	0.00646602	0.0245278
																																												856.144	0.00352721	0.00335477	0.0061161	0.00648808	0.0245633
																																												857.143	0.00352148	0.00336285	0.00614168	0.00652707	0.0251226
																																												858.142	0.00351153	0.00336742	0.00616888	0.00654679	0.0251425
																																												859.141	0.00350459	0.00337281	0.00619772	0.00658322	0.0256967
																																												860.14	0.0034937	0.00337474	0.00622813	0.00660055	0.0256996
																																												861.139	0.00348569	0.00337749	0.00626016	0.00663434	0.026245
																																												862.138	0.00347401	0.00337687	0.00629372	0.00664925	0.0262298
																																												863.137	0.00346509	0.0033771	0.00632884	0.00668035	0.0267628
																																												864.136	0.00345281	0.00337407	0.00636545	0.00669283	0.0267285
																																												865.135	0.00344315	0.00337189	0.00640358	0.00672122	0.0272454
																																												866.134	0.00343045	0.00336659	0.00644313	0.00673128	0.0271915
																																												867.133	0.00342024	0.00336217	0.00648413	0.00675695	0.027689
																																												868.132	0.00340733	0.00335478	0.00652649	0.00676463	0.0276152
																																												869.131	0.00339677	0.00334829	0.00657023	0.00678761	0.0280901
																																												870.13	0.00338385	0.00333901	0.00661525	0.00679299	0.0279967
																																												871.129	0.00337315	0.00333063	0.00666157	0.00681334	0.0284462
																																												872.128	0.00336043	0.00331967	0.00670909	0.0068165	0.0283335
																																												873.127	0.0033498	0.00330962	0.00675782	0.00683429	0.0287553
																																												874.126	0.00333751	0.0032972	0.00680766	0.00683535	0.0286243
																																												875.125	0.00332715	0.0032857	0.00685861	0.00685069	0.0290166
																																												876.124	0.00331549	0.00327206	0.00691057	0.00684979	0.0288684
																																												877.123	0.00330562	0.00325934	0.00696354	0.0068628	0.0292299
																																												878.122	0.00329479	0.00324471	0.00701742	0.0068601	0.0290661
																																												879.121	0.00328561	0.00323102	0.0070722	0.00687093	0.0293959
																																												880.12	0.00327582	0.00321564	0.00712779	0.0068666	0.0292184
																																												881.119	0.00326752	0.00320121	0.00718416	0.00687541	0.0295162
																																												882.118	0.00325894	0.00318533	0.00724123	0.00686964	0.0293271
																																												883.117	0.00325171	0.0031704	0.00729897	0.00687662	0.0295931
																																												884.116	0.00324452	0.00315426	0.00735729	0.0068696	0.0293948
																																												885.115	0.00323853	0.00313907	0.00741617	0.00687495	0.0296296
																																												886.114	0.00323287	0.00312291	0.00747552	0.00686689	0.0294245
																																												887.113	0.00322827	0.00310769	0.00753531	0.0068708	0.0296293
																																												888.112	0.00322429	0.00309174	0.00759544	0.0068619	0.0294198
																																												889.111	0.00322122	0.00307671	0.0076559	0.00686458	0.0295961
																																												890.11	0.00321903	0.00306118	0.0077166	0.00685506	0.0293847
																																												891.109	0.00321762	0.00304658	0.00777751	0.00685673	0.0295342
																																												892.108	0.00321733	0.00303168	0.00783855	0.0068468	0.0293235
																																												893.107	0.00321767	0.0030177	0.00789967	0.00684766	0.0294483
																																												894.106	0.00321936	0.00300363	0.00796082	0.00683752	0.0292405
																																												895.105	0.00322155	0.00299047	0.00802195	0.00683778	0.0293428
																																												896.104	0.00322529	0.00297742	0.008083	0.00682763	0.0291403
																																												897.103	0.0032294	0.00296526	0.00814392	0.0068275	0.0292224
																																												898.102	0.00323525	0.0029534	0.00820466	0.00681753	0.0290272
																																												899.101	0.00324132	0.00294241	0.00826518	0.00681721	0.0290916
																																												900.1	0.00324931	0.0029319	0.00832542	0.0068076	0.0289056
																																												901.099	0.00325739	0.00292224	0.00838533	0.00680727	0.0289548
																																												902.098	0.00326755	0.00291322	0.00844488	0.0067982	0.0287796
																																												903.097	0.00327767	0.00290503	0.00850403	0.00679804	0.028816
																																												904.096	0.00329	0.00289764	0.00856272	0.00678965	0.0286531
																																												905.095	0.00330217	0.00289105	0.00862092	0.00678984	0.0286793
																																												906.094	0.00331667	0.00288539	0.00867859	0.00678228	0.0285298
																																												907.093	0.00333089	0.00288052	0.0087357	0.00678296	0.0285483
																																												908.092	0.00334754	0.0028767	0.00879221	0.00677636	0.0284132
																																												909.091	0.00336381	0.00287364	0.00884808	0.00677768	0.0284263
																																												910.09	0.00338259	0.00287176	0.00890329	0.00677217	0.0283064
																																												911.089	0.00340088	0.0028706	0.0089578	0.00677426	0.0283164
																																												912.088	0.00342176	0.00287071	0.0090116	0.00676992	0.0282121
																																												913.087	0.00344204	0.00287153	0.00906464	0.00677291	0.0282214
																																												914.086	0.00346498	0.00287371	0.00911692	0.00676984	0.028133
																																												915.085	0.00348722	0.00287656	0.00916838	0.00677382	0.0281437
																																												916.084	0.00351217	0.00288085	0.00921905	0.0067721	0.0280714
																																												917.083	0.00353631	0.00288579	0.00926886	0.00677716	0.0280855
																																												918.082	0.00356322	0.00289222	0.00931783	0.00677685	0.0280292
																																												919.081	0.00358922	0.00289928	0.00936591	0.00678307	0.0280489
																																												920.08	0.00361801	0.00290787	0.00941312	0.00678422	0.0280082
																																												921.079	0.00364583	0.00291707	0.00945941	0.00679169	0.0280355
																																												922.078	0.00367644	0.00292784	0.00950481	0.00679433	0.0280101
																																												923.077	0.00370599	0.00293919	0.00954926	0.00680308	0.0280468
																																												924.076	0.00373835	0.00295213	0.0095928	0.00680725	0.028036
																																												925.075	0.00376959	0.00296564	0.00963537	0.00681734	0.028084
																																												926.074	0.00380362	0.00298073	0.00967702	0.00682305	0.0280872
																																												927.073	0.00383646	0.00299637	0.00971769	0.00683452	0.0281483
																																												928.072	0.00387207	0.0030136	0.00975742	0.00684177	0.0281646
																																												929.071	0.00390645	0.00303135	0.00979616	0.00685463	0.0282405
																																												930.07	0.00394356	0.00305067	0.00983397	0.00686342	0.0282689
																																												931.069	0.00397939	0.0030705	0.00987077	0.00687769	0.0283614
																																												932.068	0.00401791	0.00309185	0.00990664	0.00688801	0.0284008
																																												933.067	0.00405512	0.00311372	0.00994152	0.00690369	0.0285115
																																												934.066	0.00409495	0.00313705	0.00997546	0.00691552	0.0285607
																																												935.065	0.00413344	0.00316088	0.0100084	0.00693261	0.0286912
																																												936.064	0.00417448	0.00318612	0.0100404	0.00694591	0.0287489
																																												937.063	0.00421418	0.00321186	0.0100715	0.0069644	0.0289008
																																												938.062	0.00425633	0.00323892	0.0101016	0.00697912	0.0289656
																																												939.061	0.00429713	0.00326647	0.0101307	0.00699899	0.0291404
																																												940.06	0.00434028	0.00329526	0.010159	0.00701509	0.0292109
																																												941.059	0.0043821	0.00332454	0.0101862	0.0070363	0.02941
																																												942.058	0.00442614	0.00335495	0.0102126	0.00705373	0.0294844
																																												943.057	0.00446887	0.00338584	0.0102381	0.00707623	0.0297093
																																												944.056	0.00451368	0.00341776	0.0102627	0.00709492	0.0297861
																																												945.055	0.00455724	0.00345016	0.0102864	0.00711867	0.0300381
																																												946.054	0.0046027	0.00348345	0.0103092	0.00713854	0.0301153
																																												947.053	0.00464696	0.00351722	0.0103311	0.00716348	0.0303956
																																												948.052	0.00469295	0.00355174	0.0103522	0.00718444	0.0304716
																																												949.051	0.00473782	0.00358676	0.0103724	0.0072105	0.0307813
																																												950.05	0.0047842	0.00362236	0.0103919	0.00723247	0.0308539
																																												951.049	0.00482956	0.00365847	0.0104105	0.00725957	0.0311941
																																												952.048	0.00487619	0.00369498	0.0104283	0.00728245	0.0312614
																																												953.047	0.00492192	0.00373202	0.0104453	0.00731049	0.0316328
																																												954.046	0.00496867	0.00376928	0.0104616	0.00733416	0.0316926
																																												955.045	0.00501465	0.00380708	0.0104771	0.00736306	0.0320961
																																												956.044	0.00506136	0.0038449	0.0104919	0.00738739	0.0321462
																																												957.043	0.00510745	0.00388329	0.0105059	0.00741703	0.0325822
																																												958.042	0.00515397	0.00392148	0.0105193	0.00744191	0.0326203
																																												959.041	0.00520003	0.00396025	0.0105319	0.00747216	0.0330891
																																												960.04	0.00524619	0.00399861	0.010544	0.00749744	0.0331128
																																												961.039	0.00529207	0.00403757	0.0105553	0.00752817	0.0336144
																																												962.038	0.0053377	0.00407589	0.0105661	0.0075537	0.0336213
																																												963.037	0.00538325	0.00411484	0.0105762	0.00758477	0.0341556
																																												964.036	0.00542817	0.0041529	0.0105858	0.00761039	0.0341432
																																												965.035	0.00547321	0.00419163	0.0105948	0.00764165	0.0347095
																																												966.034	0.00551722	0.00422921	0.0106032	0.00766719	0.0346752
																																												967.033	0.00556158	0.00426749	0.0106111	0.00769846	0.0352728
																																												968.032	0.0056045	0.00430438	0.0106185	0.00772375	0.0352142
																																												969.031	0.00564798	0.00434199	0.0106254	0.00775487	0.0358417
																																												970.03	0.00568959	0.00437796	0.0106319	0.00777972	0.0357561
																																												971.029	0.005732	0.00441467	0.0106378	0.00781049	0.036412
																																												972.028	0.00577209	0.00444948	0.0106434	0.00783471	0.036297
																																												973.027	0.00581323	0.00448508	0.0106486	0.00786495	0.0369793
																																												974.026	0.00585158	0.00451851	0.0106534	0.00788833	0.0368324
																																												975.025	0.00589122	0.00455276	0.0106577	0.00791783	0.0375386
																																												976.024	0.00592761	0.0045846	0.0106618	0.00794019	0.0373576
																																												977.023	0.00596553	0.00461727	0.0106655	0.00796875	0.0380849
																																												978.022	0.00599973	0.0046473	0.0106689	0.00798987	0.0378675
																																												979.021	0.00603571	0.00467818	0.010672	0.00801729	0.0386127
																																												980.02	0.00606751	0.00470619	0.0106749	0.00803697	0.038357
																																												981.019	0.00610131	0.00473507	0.0106774	0.00806303	0.0391165
																																												982.018	0.00613049	0.00476085	0.0106798	0.00808109	0.0388209
																																												983.017	0.00616189	0.00478754	0.0106818	0.00810559	0.0395906
																																												984.016	0.00618824	0.00481091	0.0106838	0.00812182	0.0392538
																																												985.015	0.00621701	0.00483521	0.0106854	0.00814456	0.0400295
																																												986.014	0.00624034	0.004856	0.010687	0.00815878	0.0396506
																																												987.013	0.00626627	0.00487774	0.0106883	0.00817957	0.0404276
																																												988.012	0.00628639	0.00489579	0.0106895	0.00819162	0.0400062
																																												989.011	0.00630928	0.00491481	0.0106905	0.00821029	0.0407799
																																												990.01	0.00632603	0.00492999	0.0106915	0.00822002	0.040316
																																												991.009	0.00634569	0.00494615	0.0106923	0.0082364	0.0410815
																																												992.008	0.00635893	0.00495833	0.010693	0.00824367	0.0405757
																																												993.007	0.00637521	0.00497151	0.0106935	0.00825764	0.0413283
																																												994.006	0.00638482	0.0049806	0.0106941	0.00826234	0.0407817
																																												995.005	0.00639757	0.0049907	0.0106945	0.00827377	0.0415167
																																												996.004	0.00640347	0.00499663	0.0106948	0.00827582	0.0409311
																																												997.003	0.00641259	0.00500358	0.010695	0.00828462	0.0416438
																																												998.002	0.00641473	0.0050063	0.0106952	0.00828397	0.0410216
																																												999.001	0.00642013	0.00501005	0.0106953	0.00829007	0.0417079
																																												1000	0.0064185	0.00500954	0.0106954	0.00828669	0.0410519
[truncated: 11 more columns]
