# Supplementary material for: Prefrontal-amygdalar oscillations related to social behavior in mice
Source: eLife. 2022 May 17;11:e78428. doi: 10.7554/eLife.78428 (PMC9113747; doi:10.7554/eLife.78428)
Supplement: Figure 2—source data 1. [file elife-78428-fig2-data1.xlsx]

## Sheet: main
Fig2B	no target aviodance	no target peripheral	no target center	target aviodance	target peripheral	target center	no target aviodance	no target peripheral	no target center	target aviodance	target peripheral	target center	Fig2C	no target aviodance	no target peripheral	target aviodance	target peripheral	no target aviodance	no target peripheral	target aviodance	target peripheral
	0.0383974	-0.0502107	-0.581669	-0.15633	0.187029	-0.240082	0.0178678	0.0794207	0.0630675	-0.00303463	-0.10128	-0.204656		-0.233311	-0.223142	NaN	0.429468	0.245932	-0.111448	NaN	-0.197863
	-0.113371	-0.120341	-0.179232	0.159529	0.177157	-0.631929	0.0628857	-0.151885	-0.455335	0.150457	0.0816606	-0.156286		-0.100067	-0.0200782	0.165876	0.0686304	-0.138986	-0.0368321	-0.0883719	-0.219863
	0.225255	-0.175732	-0.394321	0.165541	0.199307	0.138132	0.00579095	0.0604409	0.0801988	-0.196899	-0.0793136	-0.0840759		0.0104127	-0.24117	0.0943261	-0.0121845	-0.0215544	-0.0316014	0.0841657	0.0385234
	-0.246792	-0.00955214	0.0624773	0.0147647	0.262789	0.0233559	0.104069	0.0728434	0.105667	0.00980008	-0.189542	-0.044771		-0.0501525	-0.263231	-0.0470889	0.228785	0.187399	0.0241803	-0.399191	-0.0880023
	-0.251662	-0.209343	0.030577	-0.275748	-0.225349	-0.163957	-0.162603	-0.198992	-0.249779	0.362599	-0.116088	-0.160669		-0.184868	-0.0303874	-0.199757	0.115593	0.517815	0.271278	-0.108971	-0.351529
	0.21247	-0.328654	0.405682	0.0491022	0.0335252	0.650066	0.170065	0.222279	0.275408	-0.246721	-0.18574	0.0161642		-0.035494	-0.0121611	-0.0245439	0.143295	-0.257423	-0.133602	-0.525354	-0.059737
	0.140072	0.201308	-0.41128	-0.119941	-0.164231	-0.22633	0.159514	0.178846	-0.585569	-0.186633	-0.256888	0.170822
	-0.133587	-0.100976	-0.369662	0.217751	0.106296	NaN	-0.169397	-0.0504595	0.0846814	0.179349	-0.0365703	NaN
	-0.403016	-0.331305	-0.563609	NaN	0.582481	NaN	0.14571	0.105253	0.0356667	NaN	-0.2137	NaN
	-0.0866729	-0.035342	0.812235	-0.00555793	-0.0329012	-0.180209	-0.0744348	-0.0201409	0.929757	-0.0586419	-0.111774	0.0763822
	0.359008	-0.396261	-0.665162	0.126482	-0.0452955	0.76793	0.0851872	0.11367	0.241309	-0.390632	0.0039325	-0.178864
	-0.123013	-0.332212	-0.600719	0.222814	0.229969	NaN	0.0109397	-0.0802072	-0.466711	-0.420539	0.0797972	NaN
	0.0207662	-0.094043	NaN	-0.0536343	0.14278	NaN	0.212733	0.0823845	NaN	-0.128086	-0.15266	NaN
	-0.223126	0.00782932	-0.53426	0.120475	0.208206	NaN	-0.244643	0.0134306	-0.212649	-0.371277	0.200891	NaN
