# Supplementary material for: Prefrontal-amygdalar oscillations related to social behavior in mice
Source: eLife. 2022 May 17;11:e78428. doi: 10.7554/eLife.78428 (PMC9113747; doi:10.7554/eLife.78428)
Supplement: Figure 3—source data 1. [file elife-78428-fig3-data1.xlsx]

## Sheet: main
Fig3A	wild	Shank3KO	Defeat	Fig3B	4-7 Hz wild	4-7 Hz Shank3KO	4-7 Hz defeat	30-60 Hz wild	30-60 Hz Shank3KO	30-60 Hz defeat	Fig3C	4-7 Hz wild	4-7 Hz Shank3KO	4-7 Hz defeat	30-60 Hz wild	30-60 Hz Shank3KO	30-60 Hz defeat
	1.14286	0	0		104.179	117.259	138.399	98.6345	81.0044	97.84		122.768	113.924	104.931	96.1147	81.1791	103.305
	2.68182	0.153846	0		114.367	117.456	120	103.01	85.168	96.994		95.1053	109.375	103.302	91.132	94.973	104.854
	1.04511	0.798238	0.504587		112.842	129.748	126.919	98.6168	98.452	98.2974		101.429	100.587	102.555	102.56	94.3564	79.6284
	1.02793	0.127209	0		106.253	139.106	140.608	97.9846	95.335	96.627		109.613	123.635	110.273	91.2415	89.7094	79.558
	1.34021	0.520297	0		102.022	121.141	128.175	104.725	101.12	93.6472		102.451	116.407	98.9774	85.5598	91.5655	101.622
	1.44681	1.08772	0.104294		97.2717	143.488	115.175	94.0331	97.787	91.2892		109.39	126.879	101.002	98.7322	100.527	98.804
	1.2749	1.12371	1.38462		84.9963	114.936		95.1763	87.9936				96.4023	99.8591		92.6058	101.707
	1.0942		0		129.003			98.0114						113.965			106.414
	0.751381		1.48652		147.651			94.5898
	1.04		0		78.6507			82.4248
	1.22426				125.022			98.4725
	0.725352				121.407			97.8554
	1.2029				112.217			93.8347
	1.86331				111.309			99.5146
