# Supplementary material for: Prefrontal-amygdalar oscillations related to social behavior in mice
Source: eLife. 2022 May 17;11:e78428. doi: 10.7554/eLife.78428 (PMC9113747; doi:10.7554/eLife.78428)
Supplement: Figure 4—source data 1. [file elife-78428-fig4-data1.xlsx]

## Sheet: main
Fig4A	4-7 Hz aviodance	4-7 Hz other	30-60 Hz aviodance	30-60 Hz other	4-7 Hz aviodance	4-7 Hz other	30-60 Hz aviodance	30-60 Hz other	Fig4B	4-7 Hz aviodance	4-7 Hz other	30-60 Hz aviodance	30-60 Hz other	4-7 Hz aviodance	4-7 Hz other	30-60 Hz aviodance	30-60 Hz other	Fig4C	4-7 Hz aviodance	4-7 Hz other	30-60 Hz aviodance	30-60 Hz other	4-7 Hz aviodance	4-7 Hz other	30-60 Hz aviodance	30-60 Hz other
	-0.199398	0.0700589	0.054953	-0.0193078	0.165876	-0.110584	-0.0883719	0.0589146		0.03	-0.3	-0.05	0.3	0.05	-0.3	-0.03	0.22		0.0960219	-0.530208	0.00185606	-0.0102487	0.102052	-0.0396869	-0.0178293	0.00693363
	0.00165396	-0.000143822	0.0475454	-0.00413438	0.0922231	-0.00658736	0.0642865	-0.00459189		0.03	-0.04	0.02	-0.02	-0.01	0.01	-0.01	0		0.075281	-0.588963	-0.0228384	0.178677	0	-4.73695e-17	0	-8.80777e-17
	-0.00443981	0.000845679	-0.120674	0.0229856	-0.151565	0.0274487	-0.240507	0.0435564		0.09	-0.04	0.05	-0.1	0.1	-0.05	0.06	-0.13		0.209349	-0.198474	-0.0575937	0.0546018	0.0682509	-0.0143107	0.181075	-0.0379673
	-0.0507993	0.00967606	0.112413	-0.0214121	-0.236371	0.0773958	0.232829	-0.076236		0.17	-0.03	0.04	-0.09	-0.05	0.1	0.06	-0.13		0.115501	-0.409505	-0.0846011	0.299949	-0.0618472	0.012968	0.171047	-0.0358646
	-0.303032	0.0193425	0.18776	-0.0119847	-0.135409	0.00466926	-0.0618258	0.0213192		0.17	-0.19	-0.02	0.02	0.2	-0.22	0.02	-0.02		0.0553158	-0.359552	-0.0571635	0.371563	-0.0109969	0.0422137	-0.0445222	0.170908
	0.0777157	-0.170313	-0.0747615	0.163839						0.1	-0.05	-0.04	0.04	0.06	-0.05	-0.05	0.04		0.176469	-0.287923	-0.135516	0.221106
	0.0737186	-0.0680479	-0.0152639	0.0140897
	0.0488243	-0.0112056	0.170046	-0.0390268
	0.237255	-0.15817	0.0934425	-0.062295
	-0.0821053	0.00586466	-0.378067	0.0270048
	-0.00322683	0.000584386	-0.405623	0.0734594
	-0.100998	0.0330701	-0.0164847	0.00539766
	-0.0103221	0.000355933	-0.0535471	0.0184645
