# Supplementary material for: Prefrontal-amygdalar oscillations related to social behavior in mice
Source: eLife. 2022 May 17;11:e78428. doi: 10.7554/eLife.78428 (PMC9113747; doi:10.7554/eLife.78428)
Supplement: Figure 5—source data 1. [file elife-78428-fig5-data1.xlsx]

## Sheet: main
Fig5D	approach	leaving	Fig5F	4-7 Hz approach	4-7 Hz leaving	30-60 Hz approach	30-60 Hz leaving	4-7 Hz approach	4-7 Hz leaving	30-60 Hz approach	30-60 Hz leaving	4-7 Hz approach	4-7 Hz leaving	30-60 Hz approach	30-60 Hz leaving	Fig5G	Frequency (Hz)	dmPFCtoBLA						BLAtodmPFC
	13.966	0.27856		0.170329	0.234717	-0.0558024	-0.151488	-0.152623	-0.124149	0.290192	0.0494159	-0.110026	0.0674354	-0.0407049	0.0249482		1	0.437305	0.0777195	0.294959	0.647657	0.313244	0.0877413	0.109426	0.0101834	0.121771	0.0342288	0.0682089	0.0362068
	5.38237	0.350217		0.0712902	-0.0537316	0.0724385	-0.0891387	-0.300855	-0.121336	0.254051	0.260095	-0.350519	0.102738	-0.110682	0.0324414		2	0.411327	0.0775911	0.268793	0.58803	0.289883	0.0873476	0.108201	0.0108135	0.115959	0.0340383	0.0678776	0.0356281
	0.355372	1.02603		0.0380035	0.0608317	0.0158005	0.0407674	-0.0811609	-0.0713438	0.153633	-0.188213	-0.18393	0.100498	-0.105617	0.0577084		3	0.549109	0.0770644	0.228592	0.542941	0.266013	0.0861151	0.108535	0.0113874	0.103444	0.0337566	0.0685311	0.0356297
	0.0997831	1.10466		0.0713841	0.0492787	-0.0259817	-0.0324345	-0.155749	0.107473	-0.0559836	0.179731	-0.106024	0.0579305	-0.0300897	0.0164408		4	0.509113	0.0773917	0.194812	0.477688	0.236963	0.0854891	0.107084	0.0118594	0.0932029	0.0334994	0.0683037	0.0348122
	0.428328	0.320824		-0.0243415	0.0609014	-0.00898014	-0.00956127	-0.178936	0.0201515	0.367767	-0.108945	-0.224233	0.0267741	-0.0836183	0.00998428		5	0.467018	0.0771388	0.161065	0.406583	0.210698	0.0829159	0.106871	0.0133147	0.0805846	0.0330201	0.0691042	0.0339211
	0.496755	0.726313		-0.282513	-0.127342	0.156356	0.140936	-0.0200615	0.0313441	0.015915	0.139505	-0.202071	0.0866016	-0.0658331	0.0282142		6	0.430211	0.0768565	0.136539	0.358326	0.187266	0.0819481	0.105169	0.0151712	0.0707534	0.032381	0.0689949	0.0330229
	2.10639	1.67057		-0.0741815	0.0254438	0.0389164	0.0133694										7	0.391157	0.0765683	0.114274	0.324986	0.167269	0.0799822	0.104466	0.0174183	0.060524	0.0319139	0.0698852	0.0330813
	2.57367	1.27376		-0.100281	-0.0265724	-0.100055	-0.082586										8	0.359443	0.0759183	0.0986826	0.279613	0.150923	0.0789129	0.102493	0.0193168	0.0526089	0.0311893	0.0698986	0.0322631
	2.95567	2.99832		-0.245036	-0.157555	0.0642625	0.152371										9	0.327513	0.0752147	0.0846599	0.248982	0.137286	0.0758622	0.101344	0.0215875	0.0449362	0.0305128	0.0708441	0.031655
	4.23492	3.57557		-0.20794	-0.31639	0.0442585	0.0907908										10	0.301186	0.0760701	0.074939	0.219343	0.126402	0.0747137	0.0990971	0.0230364	0.0389552	0.0296851	0.0709797	0.0310564
	5.26873	3.18121		-0.159685	0.0145789	-0.00126523	0.116164										11	0.276179	0.0758994	0.0660256	0.198963	0.11742	0.0729985	0.0975288	0.0263805	0.0333352	0.0291711	0.071967	0.0312052
	10.3583	1.16144		-0.113396	-0.00237792	0.0414437	0.0390924										12	0.254663	0.0758006	0.0599171	0.18441	0.110297	0.0718576	0.0950159	0.030062	0.028915	0.0282496	0.0722267	0.0307104
	3.46272	9.32997		-0.346875	-0.0723329	0.433305	-0.0189287										13	0.23533	0.0752373	0.0541381	0.167918	0.104499	0.0693243	0.0930504	0.0328745	0.0248175	0.0273604	0.073258	0.0305027
	0.940136	0.825838		-0.0484467	0.0636292	-0.0410539	0.124395										14	0.217785	0.0752783	0.050285	0.154663	0.099934	0.0682537	0.0902798	0.037071	0.0215786	0.0264638	0.0736464	0.0301765
	0.634702	0.600995															15	0.202855	0.0748717	0.046484	0.145691	0.096322	0.0671583	0.0879389	0.0404976	0.0185916	0.0256825	0.0747321	0.0304204
	1.0575	0.759112															16	0.188474	0.07601	0.0440966	0.138432	0.0935406	0.0661379	0.0849224	0.0429813	0.0162343	0.0245966	0.0752548	0.0301597
	2.53968	2.40881															17	0.176905	0.0762546	0.0415938	0.132755	0.0914799	0.0643987	0.0822328	0.0478607	0.0140617	0.023657	0.0764082	0.0302459
	0.793412	1.80817															18	0.165013	0.0759614	0.0402061	0.126122	0.0899929	0.0630173	0.0789893	0.0513662	0.0123658	0.0227832	0.0770692	0.030428
	0.766259	1.76081															19	0.156006	0.076365	0.0385904	0.12141	0.089083	0.0630173	0.0759882	0.0566501	0.010799	0.0223295	0.078302	0.030428
	0.349832	0.592729															20	0.146064	0.0768471	0.0379205	0.117287	0.0885824	0.0619677	0.0725488	0.0621675	0.00960598	0.0218105	0.0791028	0.0307005
	0.407977	0.562428															21	0.139022	0.0768051	0.0369347	0.115177	0.0885702	0.0611583	0.069289	0.0663223	0.00849799	0.0210679	0.0804234	0.030613
	1.11171	1.23058															22	0.130612	0.0774004	0.0368066	0.111786	0.0888612	0.0604571	0.0657016	0.0679012	0.00769393	0.0202761	0.0813617	0.0310017
	0.839213	1.44036															23	0.125089	0.0780174	0.0362841	0.109058	0.089587	0.0604571	0.062255	0.0738332	0.00694015	0.0195057	0.0827733	0.0310017
	2.00433	0.88947															24	0.11789	0.0786905	0.0365849	0.106892	0.0905466	0.0600264	0.0585873	0.0799437	0.00644277	0.018756	0.0838427	0.0314726
	3.49239	0.476852															25	0.113549	0.0794123	0.0364137	0.105207	0.0919102	0.0593396	0.0550452	0.0862117	0.00596782	0.0180258	0.0853432	0.0314606
	2.04648	1.49619															26	0.107316	0.0801758	0.0370692	0.104534	0.0934618	0.0591855	0.0513839	0.0926139	0.00571699	0.0176528	0.0865326	0.0320342
	0.559647	1.57643															27	0.103903	0.0798069	0.0371712	0.103867	0.0954018	0.0585575	0.0478543	0.0949326	0.00546573	0.0167984	0.0881134	0.0320596
	1.20983	5.79492															28	0.0984455	0.0809746	0.0381308	0.103026	0.0974989	0.0592487	0.0442997	0.0991262	0.00541696	0.0161182	0.0894063	0.0326909
	1.10162	14.108															29	0.0957647	0.0818028	0.0384495	0.102497	0.0999793	0.0586436	0.0408983	0.105722	0.00534842	0.0154545	0.0910521	0.0327325
	0.308737	1.54687															30	0.0909347	0.0826553	0.0396777	0.10243	0.102595	0.0589226	0.0375549	0.112375	0.00546829	0.0148402	0.0924257	0.0334904
	0.176392	0.492068															31	0.0888344	0.0835274	0.0401705	0.102357	0.105596	0.0583521	0.0343936	0.119057	0.00555145	0.0142157	0.0941135	0.0335609
	4.30596	3.71062															32	0.0845165	0.0833501	0.0416408	0.102459	0.108716	0.0593757	0.0313577	0.121268	0.00581439	0.0136934	0.0955381	0.0343375
	5.52971	7.15288															33	0.0828768	0.0842807	0.0422742	0.102664	0.112226	0.0594268	0.0285315	0.127913	0.00602531	0.0133082	0.0972363	0.034453
	4.65867	3.52575															34	0.07898	0.085316	0.0439659	0.102975	0.11584	0.0594367	0.0258791	0.132393	0.00641132	0.0129773	0.0986743	0.0353746
	6.83813	3.8927															35	0.0777047	0.0862262	0.0447119	0.103573	0.119852	0.0601924	0.0234557	0.138992	0.00673099	0.0124432	0.100343	0.0364264
	3.41676	6.22195															36	0.0741567	0.0871435	0.046607	0.10434	0.123952	0.0601924	0.0212344	0.145508	0.00722397	0.0118747	0.101748	0.0364264
	3.50885	6.02437															37	0.0731674	0.087853	0.0474416	0.105185	0.128455	0.0610675	0.0192493	0.150414	0.00763683	0.0112657	0.103338	0.0375819
	2.78251	2.29255															38	0.0699102	0.0880844	0.0495234	0.106012	0.133027	0.0605322	0.0174758	0.153907	0.00822335	0.0108467	0.104657	0.0377121
	0.841423	4.59556															39	0.0691423	0.0890438	0.0504249	0.107166	0.138004	0.0615086	0.0159333	0.160129	0.00871609	0.0103751	0.106111	0.0389869
	2.62472	NaN															40	0.0661288	0.0899154	0.0526761	0.107935	0.143022	0.0615086	0.0145966	0.164322	0.00938439	0.0100624	0.107284	0.0389869
	0.855542	3.00853															41	0.065528	0.0908378	0.053624	0.10927	0.148438	0.0625644	0.0134755	0.170274	0.00994505	0.00963044	0.10854	0.0403749
	0.222261	4.29473															42	0.0627197	0.0916881	0.0560263	0.110714	0.153859	0.0620267	0.0125433	0.175105	0.0106843	0.00923514	0.109503	0.0405346
	5.58748	2.14506															43	0.0622402	0.0926273	0.0570009	0.112256	0.159662	0.0631364	0.0118049	0.180802	0.0113015	0.00887956	0.110496	0.0420484
	0.750829	0.208018															44	0.0596048	0.0928426	0.0595335	0.113268	0.165419	0.0631364	0.0112308	0.183251	0.0121011	0.00868076	0.111186	0.0420484
	0.382092	0.884926															45	0.0592079	0.0937656	0.060515	0.114939	0.171526	0.0642782	0.0108261	0.188501	0.0127636	0.00840322	0.111854	0.0436809
	0.746598	1.44661															46	0.0567182	0.0944327	0.0631542	0.116686	0.17752	0.0637289	0.0105562	0.192013	0.0136126	0.00817083	0.112214	0.0438637
	2.06193	0.269522															47	0.0563712	0.0953293	0.0641225	0.118221	0.183817	0.064871	0.0104318	0.196461	0.0143086	0.00804363	0.112504	0.0456207
	6.05092	0.0659269															48	0.0540039	0.0961701	0.0668411	0.119444	0.189916	0.064871	0.0104096	0.201155	0.0151956	0.0079306	0.112489	0.0456207
	5.59746	2.34695															49	0.0536796	0.0969684	0.0677751	0.120965	0.196251	0.0659891	0.0105119	0.205567	0.0159126	0.00784856	0.112364	0.0474918
	1.92954	0.349883															50	0.0514148	0.0971867	0.0705419	0.122501	0.202288	0.0663713	0.0106813	0.206959	0.0168251	0.00779608	0.111945	0.0475766
	0.536478	1.3771															51	0.0510914	0.0979342	0.0714186	0.12445	0.208475	0.0664826	0.0109584	0.210882	0.0175498	0.00775332	0.111386	0.0496644
	1.13425	3.38162															52	0.0489119	0.0983975	0.0741979	0.126421	0.21425	0.067452	0.0112666	0.213501	0.0184744	0.0077536	0.110557	0.0517328
	1.46183	0.709807															53	0.0485726	0.0990064	0.0749925	0.127993	0.220076	0.067452	0.0116702	0.217007	0.0191923	0.0078227	0.109571	0.0517328
	2.21549	0.690447															54	0.0464645	0.0995295	0.077744	0.129967	0.225371	0.0682993	0.0120689	0.220198	0.0201146	0.00789845	0.108348	0.0538716
	0.939191	1.31832															55	0.0460974	0.0997508	0.0784289	0.131356	0.230611	0.0677206	0.0125552	0.220853	0.0208109	0.00785677	0.10696	0.0540486
	2.77676	0.215571															56	0.0440502	0.100173	0.0811082	0.13289	0.235206	0.0684113	0.0130023	0.223557	0.0217159	0.00798935	0.10538	0.0562151
	3.55692	0.153039															57	0.0436479	0.100658	0.0816533	0.134787	0.239643	0.0684113	0.0135332	0.226161	0.0223755	0.00815113	0.103638	0.0562151
	0.336887	0.281027															58	0.0416551	0.100454	0.0842123	0.136114	0.243337	0.0689165	0.013994	0.227839	0.0232482	0.00852749	0.101754	0.0583806
	0.638741	1.09668															59	0.0412149	0.100507	0.0845854	0.137927	0.246786	0.068337	0.0145378	0.229739	0.0238562	0.00873696	0.0997188	0.0585018
	0.148404	1.41391															60	0.0392739	0.100413	0.0869738	0.139571	0.249425	0.0686314	0.0149853	0.231318	0.024682	0.00880905	0.097595	0.0605887
	0.0890848	0.953682															61	0.0387972	0.100804	0.0871418	0.141253	0.251756	0.0686314	0.0155173	0.231515	0.0252249	0.0090461	0.0953349	0.0605887
	0.0484527	0.930143															62	0.0369099	0.100547	0.0893098	0.14191	0.253249	0.0686905	0.0159324	0.232665	0.0259904	0.0090968	0.0930392	0.0625639
	0.0629681	0.303996															63	0.0364023	0.100123	0.0892405	0.143046	0.2544	0.0681232	0.0164347	0.233508	0.0264563	0.00936189	0.0906239	0.0625784
	0.185586	0.134036															64	0.0345746	0.099172	0.0911412	0.144443	0.254727	0.0679376	0.0168052	0.234188	0.0271501	0.00963007	0.0882224	0.0643304
	0.290161	0.0332362															65	0.0340446	0.0984249	0.0908066	0.145707	0.254709	0.0683202	0.0172662	0.234549	0.0275298	0.00990503	0.0857177	0.0639385
	0.259614	0.205011															66	0.0322856	0.097746	0.0924002	0.146823	0.253923	0.0674909	0.0175859	0.234965	0.0281429	0.010184	0.0832704	0.0658343
	0.155957	0.172822															67	0.031745	0.0978239	0.091779	0.147275	0.252814	0.0667804	0.0179991	0.234297	0.0284301	0.0104237	0.0807345	0.067025
	1.18341	0.102305															68	0.0300659	0.0967209	0.093036	0.148123	0.251025	0.0662536	0.0182661	0.23402	0.0289566	0.0107005	0.0782927	0.066821
	0.367207	0.879506															69	0.0295279	0.09546	0.092117	0.148423	0.248952	0.0658102	0.0186293	0.233496	0.0291482	0.0109726	0.0757743	0.0678456
	0.122384	0.111492															70	0.027941	0.0938306	0.0930217	0.148963	0.246311	0.0652978	0.0188447	0.233334	0.0295855	0.0112448	0.0733793	0.0675798
	0.180514	0.0696951															71	0.0274197	0.0925883	0.0918059	0.14931	0.243432	0.0640953	0.0191587	0.23276	0.0296817	0.0115117	0.0709171	0.0679248
	0.0462282	0.210372															72	0.0259366	0.0909717	0.0923577	0.149314	0.240108	0.0636167	0.0193253	0.231649	0.03003	0.0117699	0.0686002	0.0675394
	0.351212	0.714893															73	0.0254459	0.0908464	0.0908592	0.149264	0.236592	0.0626629	0.0195928	0.230596	0.030034	0.0119736	0.0662234	0.0678329
	1.21184	0.0657302															74	0.0240766	0.0890794	0.0910737	0.149411	0.232757	0.0622034	0.0197146	0.22924	0.0302966	0.0120453	0.0640072	0.0673941
	1.56026	0.0390769															75	0.023629	0.0872247	0.0893191	0.149042	0.228768	0.0605836	0.0199394	0.227715	0.0302141	0.0122821	0.0617363	0.0668154
	2.22853	1.20847															76	0.0223808	0.0855726	0.0892255	0.14846	0.224583	0.0601661	0.0200207	0.227235	0.0303962	0.0125088	0.0596355	0.0662919
	0.397596	2.49728															77	0.0219867	0.0836424	0.087252	0.147504	0.22027	0.0583872	0.0202072	0.225455	0.0302351	0.0126246	0.057484	0.0652714
	1.21296	1.7206															78	0.0208638	0.0816722	0.0868911	0.146597	0.215873	0.0583872	0.0202524	0.223547	0.0303438	0.0128379	0.0555073	0.0652714
	0.166296	1.11855															79	0.0205308	0.0812961	0.0847429	0.146017	0.211366	0.0564551	0.0204052	0.222285	0.0301131	0.0130939	0.0534831	0.0638842
	1.49835	1.62502															80	0.019534	0.0792487	0.0841624	0.144769	0.206873	0.0561078	0.0204184	0.220238	0.0301564	0.0132788	0.0516343	0.0633051
	0.963716	2.38426															81	0.0192669	0.0775296	0.0818876	0.14348	0.202278	0.0540745	0.0205417	0.218365	0.0298659	0.0134513	0.0497406	0.0616028
	0.784617	0.884148															82	0.0183937	0.0756501	0.0811385	0.141895	0.197783	0.0533379	0.0205269	0.217189	0.0298524	0.0136126	0.04802	0.0613692
	1.46829	0.890388															83	0.0181945	0.0736414	0.0787848	0.140137	0.193184	0.0519441	0.0206248	0.2149	0.0295121	0.0137615	0.0462572	0.0596507
	1.19205	1.66228															84	0.0174397	0.0730693	0.0779177	0.138361	0.188758	0.0497425	0.0205855	0.213564	0.0294503	0.0138499	0.0446627	0.0575088
	1.60542	0.529922															85	0.0173079	0.071029	0.0755302	0.1367	0.184221	0.0494947	0.0206618	0.211199	0.0290701	0.0139332	0.0430287	0.0569785
	0.0742753	0.381422															86	0.016664	0.0694036	0.0745922	0.13487	0.179917	0.047495	0.0206011	0.209039	0.0289681	0.0140566	0.0415565	0.0552349
	0.06256	0.0447949															87	0.0165973	0.0674262	0.0722106	0.13321	0.17549	0.0472719	0.0206592	0.206574	0.0285575	0.0140552	0.0400478	0.0547313
	0.0447204	0.0997228															88	0.0160552	0.0657994	0.0712436	0.130877	0.171344	0.045025	0.0205803	0.205172	0.0284229	0.0141576	0.0386933	0.0524096
	0.0971508	0.0881282															89	0.0160496	0.0639097	0.0689016	0.128444	0.167064	0.0448501	0.0206231	0.202638	0.0279905	0.014248	0.0373056	0.0519671
	0.149886	0.0289															90	0.0155994	0.063133	0.067941	0.126748	0.163101	0.0427745	0.0205289	0.201276	0.0278303	0.0143848	0.0360636	0.0500595
	0.086504	0.0851655															91	0.0156501	0.0616936	0.0656656	0.125057	0.158993	0.0426227	0.0205591	0.19898	0.027384	0.0143993	0.0347923	0.0496492
	0.330627	0.786384															92	0.0152814	0.0598558	0.0647407	0.122474	0.155227	0.0404079	0.0204523	0.196402	0.0272042	0.0144582	0.0336576	0.0473425
	0.0456323	0.544055															93	0.0153829	0.0580562	0.0625523	0.119838	0.151306	0.0402999	0.0204725	0.193807	0.0267513	0.0145056	0.0324978	0.046996
	0.385032	0.464767															94	0.0150855	0.056698	0.0616861	0.117164	0.147746	0.038221	0.0203558	0.192276	0.0265573	0.0145417	0.0314657	0.0450774
	8.48834	1.11159															95	0.0152322	0.0549843	0.0595992	0.114908	0.144023	0.0381336	0.0203684	0.189649	0.0261041	0.0145779	0.030413	0.0447612
	9.83965	1.46029															96	0.0149962	0.0545708	0.0588095	0.112714	0.140671	0.0360061	0.0202446	0.188583	0.0259006	0.0145463	0.029479	0.0425908
	8.56175	0.761943															97	0.0151828	0.0528842	0.0568335	0.110014	0.137152	0.0348341	0.020252	0.185958	0.0254526	0.0145512	0.0285292	0.0423374
	3.98928	1.67374															98	0.0149988	0.0512341	0.0561332	0.107872	0.134006	0.0339283	0.0201237	0.183328	0.0252436	0.0145881	0.0276894	0.0405017
	1.77788	1.09346															99	0.01522	0.0496194	0.0542732	0.105207	0.130692	0.0327698	0.0201283	0.180692	0.0248057	0.0145786	0.0268389	0.0402756
	2.09241	2.63771															100	0.0150796	0.0490248	0.0536716	0.103865	0.127749	0.0318913	0.0199985	0.179398	0.0245946	0.0145365	0.0260904	0.0382938
	3.1573	3.03023															101	0.0153307	0.0474927	0.0519293	0.101226	0.124639	0.0299497	0.020003	0.176755	0.0241708	0.0145086	0.0253363	0.0364196
	2.50034	3.94926															102	0.0152263	0.046493	0.0514325	0.0991271	0.121894	0.0299617	0.0198747	0.17541	0.0239606	0.0144256	0.0246765	0.0362479
	2.24391	2.24828															103	0.0155029	0.0449794	0.0498067	0.0965641	0.118987	0.0280755	0.0198816	0.172763	0.0235543	0.0143789	0.0240165	0.0346477
	0.464296	1.73823															104	0.0154277	0.0434976	0.0494183	0.0945146	0.116434	0.0280998	0.0197581	0.170113	0.0233473	0.0143445	0.023444	0.0344935
	0.432696	6.60414															105	0.0157258	0.0426399	0.0479057	0.0920528	0.113726	0.0263081	0.0197703	0.167841	0.0229612	0.014281	0.0228767	0.0328401
	1.70168	1.5904															106	0.0156737	0.0412278	0.0476274	0.0902304	0.111359	0.0263535	0.019655	0.165199	0.0227595	0.0142898	0.0223905	0.032716
	0.453978	0.493106															107	0.0159897	0.0406265	0.0462229	0.0878882	0.108846	0.0245884	0.0196757	0.1648	0.0223958	0.0142134	0.0219151	0.0312869
	1.04752	5.35712															108	0.0159555	0.039236	0.0460548	0.0860729	0.106659	0.0246427	0.019572	0.162135	0.0222008	0.0140858	0.0215153	0.0311755
	2.30066	4.19323															109	0.0162863	0.0378749	0.0447519	0.0842933	0.104338	0.0230047	0.0196045	0.159465	0.021861	0.0140204	0.0211319	0.0297308
	5.13219	1.5198															110	0.0162653	0.0371613	0.0446927	0.082138	0.102327	0.0230733	0.0195163	0.157241	0.0216741	0.0139211	0.0208192	0.029641
	3.93183	7.17614															111	0.016608	0.0358609	0.0434838	0.0802928	0.100193	0.02144	0.019564	0.154574	0.021359	0.0137622	0.0205285	0.0283784
	6.32922	8.41214															112	0.0165961	0.0345878	0.0435309	0.0782695	0.0983524	0.0215141	0.0194949	0.151899	0.0211811	0.013642	0.0203042	0.0282976
	3.98087	0.975784															113	0.016948	0.0339648	0.0424077	0.0772741	0.0964026	0.0200278	0.0195615	0.151408	0.0208911	0.0136478	0.0201076	0.0270409
	1.76824	0.608803															114	0.0169416	0.0327187	0.0425575	0.0759713	0.0947301	0.0191427	0.0195152	0.148704	0.0207228	0.0135222	0.0199734	0.0269444
	2.87805	5.45079															115	0.0173003	0.0321227	0.0415108	0.0741235	0.092961	0.0186139	0.0196044	0.146517	0.0204578	0.0133929	0.0198727	0.0258666
	2.76292	11.6844															116	0.017296	0.0309309	0.0417586	0.0723521	0.0914543	0.0177645	0.0195846	0.143809	0.0202994	0.013257	0.0198309	0.0257694
	1.06516	2.83395															117	0.0176593	0.0297663	0.0407787	0.070657	0.0898634	0.0173586	0.0196999	0.141088	0.0200588	0.0131148	0.0198282	0.0247152
	9.28896	7.72604															118	0.0176542	0.0286292	0.0411185	0.0694014	0.0885214	0.0160888	0.0197099	0.138353	0.0199104	0.0130014	0.019881	0.0236958
	5.23435	10.8212															119	0.0180198	0.0280204	0.0401955	0.0678455	0.0871065	0.0160888	0.0198548	0.137769	0.0196931	0.0128481	0.0199782	0.0236958
	4.1698	5.0101															120	0.0180112	0.0275197	0.0406206	0.0671835	0.0859288	0.0148887	0.0198979	0.135604	0.0195545	0.01277	0.0201273	0.0227438
	4.1104	7.83871															121	0.0183772	0.0264381	0.0397442	0.0657524	0.0846882	0.0149757	0.0200755	0.13284	0.0193591	0.0126083	0.020326	0.0227009
	1.44034	5.7768															122	0.0183624	0.0253845	0.0402466	0.0644934	0.083675	0.0138428	0.0201545	0.13006	0.0192301	0.0123385	0.0205723	0.0218147
	8.01664	2.59719															123	0.0187268	0.0243593	0.0394068	0.0635082	0.0826073	0.0138428	0.0203676	0.127263	0.0190548	0.0121991	0.0208729	0.0218147
	6.27199	6.08346															124	0.0187035	0.0233626	0.039978	0.0622662	0.0817591	0.0127771	0.0204848	0.124451	0.0189348	0.0120194	0.021216	0.0209871
	5.82365	7.12683															125	0.0190643	0.0233626	0.0391647	0.0613712	0.0808626	0.0128583	0.0207359	0.124451	0.0187775	0.0118165	0.0216169	0.0209505
	3.7646	6.56777															126	0.0190302	0.0223945	0.0397953	0.0602518	0.0801797	0.0118556	0.0208931	0.121622	0.0186659	0.011633	0.022054	0.0201787
	5.48928	1.13694															127	0.0193854	0.0214552	0.0389991	0.0598926	0.0794521	0.0119301	0.021184	0.118776	0.0185245	0.0117219	0.0225513	0.0201439
	7.36137	7.52218															128	0.0193382	0.0205448	0.0396796	0.0588686	0.0789341	0.0109179	0.0213822	0.115915	0.0184205	0.0115379	0.0230768	0.0194577
	4.24415	5.53342															129	0.0196861	0.0196633	0.0388918	0.0579076	0.0783719	0.0109882	0.0217142	0.113038	0.0182925	0.0113518	0.0236629	0.0194231
	1.36887	0.668081															130	0.0196236	0.0193154	0.0396123	0.0570076	0.0780168	0.01011	0.0219539	0.110864	0.0181952	0.0111641	0.0242674	0.0187494
	6.11086	0.268623															131	0.0199622	0.0188108	0.0388252	0.0563829	0.0776149	0.00953234	0.0223274	0.110145	0.0180782	0.0109736	0.0249307	0.0186298
	4.51078	1.94857															132	0.0198823	0.0179872	0.0395762	0.0558217	0.0774185	0.00929496	0.0226085	0.107239	0.0179868	0.0106856	0.0256005	0.01812
	3.94522	4.1794															133	0.02021	0.0171923	0.0387831	0.0550618	0.0771692	0.00875086	0.0230232	0.104319	0.0178781	0.0104979	0.0263246	0.0179947
	2.18165	1.50907															134	0.0201107	0.0164261	0.0395556	0.054356	0.0771246	0.00859246	0.0233446	0.101386	0.0177915	0.0103116	0.0270413	0.0174946
	3.99324	0.443487															135	0.0204257	0.0161265	0.038751	0.0540827	0.0770171	0.00789647	0.0237994	0.0991954	0.0176887	0.0102096	0.0278051	0.0169443
	1.57258	0.541946															136	0.0203049	0.0153625	0.0395367	0.0536677	0.0771138	0.00789647	0.0241593	0.0975845	0.0176061	0.0100477	0.0285463	0.0169443
	0.316346	3.70637															137	0.0206057	0.0149786	0.0387166	0.053256	0.0771335	0.00726224	0.0246523	0.0954912	0.0175067	0.00988448	0.0293244	0.0164308
	0.555728	3.33328															138	0.0204617	0.0142968	0.0395083	0.0527195	0.0773573	0.00729371	0.025048	0.0925316	0.0174269	0.00971035	0.0300643	0.0163871
	0.59928	2.76877															139	0.0207468	0.0136425	0.0386694	0.0522277	0.0774861	0.0067146	0.0255763	0.0895666	0.0173287	0.00954207	0.0308285	0.0159057
	0.414793	2.87182															140	0.0205778	0.0133827	0.0394611	0.0516457	0.0778189	0.0067146	0.0260046	0.0873623	0.0172508	0.00956458	0.0315395	0.0159057
	3.80914	5.96062															141	0.020846	0.0127643	0.0386015	0.0513838	0.078035	0.00619699	0.0265644	0.0843927	0.0171516	0.00941973	0.0322605	0.015457
	6.04514	0.962563															142	0.0206506	0.0121134	0.0393881	0.0513432	0.0784554	0.00620837	0.0270212	0.082752	0.0170747	0.00932253	0.0329155	0.0154043
	5.90966	1.21509															143	0.0209007	0.0118402	0.0385068	0.0510401	0.0787342	0.00574543	0.0276081	0.0806616	0.0169726	0.00908947	0.0335652	0.0149832
	5.84881	1.47574															144	0.0206776	0.011606	0.0392845	0.0507093	0.0792184	0.00574543	0.0280888	0.0784576	0.0168957	0.00896027	0.03414	0.0149832
	1.43133	2.78034															145	0.0209089	0.0110652	0.038381	0.0504123	0.0795335	0.00534413	0.0286976	0.0754977	0.0167891	0.00884266	0.0346939	0.0145915
	0.854469	7.5456															146	0.0206572	0.0105491	0.0391469	0.05026	0.0800565	0.00501243	0.0291971	0.0725471	0.0167115	0.00872979	0.0351689	0.0144137
	0.393242	3.87578															147	0.020869	0.0100575	0.0382212	0.0500153	0.0803815	0.00498835	0.0298221	0.0696092	0.0165989	0.00863394	0.0356081	0.014159
	2.16255	4.25891															148	0.0205881	0.00952128	0.0389731	0.0497983	0.0809185	0.00470617	0.0303349	0.0679731	0.0165197	0.00855294	0.03597	0.0140438
	4.71342	6.71447															149	0.0207802	0.00958949	0.0380254	0.0500024	0.0812279	0.00470411	0.0309701	0.0666872	0.0164001	0.00857284	0.036282	0.013818
	6.43529	1.24889															150	0.0204699	0.00914485	0.0387618	0.0499105	0.0817561	0.00443209	0.0314905	0.0637852	0.0163189	0.00849925	0.0365244	0.0136222
	4.71445	1.00988															151	0.0206422	0.00872277	0.0377923	0.049746	0.0820272	0.00444551	0.0321299	0.0609065	0.0161913	0.00846104	0.0367041	0.0134184
	2.96181	0.609137															152	0.0203029	0.00832283	0.0385119	0.0496016	0.0825266	0.00427963	0.032652	0.0580555	0.0161075	0.00844129	0.0368269	0.0131226
	2.13984	0.630485															153	0.0204557	0.0079443	0.0375207	0.04938	0.0827402	0.00427963	0.0332895	0.0552358	0.0159715	0.0083428	0.0368755	0.0131226
	2.25685	0.31382															154	0.0200881	0.00770645	0.0382223	0.0491205	0.0831945	0.00417658	0.0338077	0.0543392	0.0158847	0.00846731	0.0368845	0.0128506
	5.953	0.448219															155	0.0202221	0.00758673	0.0372095	0.0491349	0.083336	0.00412087	0.0344377	0.0524518	0.0157401	0.00853495	0.0368087	0.0127488
	3.50278	6.61148															156	0.0198273	0.0072494	0.0378916	0.0493345	0.083733	0.00407481	0.0349466	0.0497074	0.0156501	0.00857063	0.0367136	0.0124938
	0.851264	0.431718															157	0.0199435	0.00693185	0.036857	0.0492497	0.0837921	0.00407481	0.0355636	0.0470071	0.0154968	0.00863747	0.036524	0.0124938
	0.50764	0.855975															158	0.0195232	0.00663337	0.037518	0.0491744	0.0841236	0.00409172	0.0360579	0.0443548	0.0154036	0.00872623	0.0363374	0.012261
	0.410611	1.08411															159	0.0196228	0.00642938	0.0364612	0.0491403	0.0840943	0.00401938	0.0366574	0.0434745	0.0152418	0.00877764	0.0360475	0.0121406
	0.621137	0.797376															160	0.0191792	0.00615882	0.037099	0.0491129	0.0843557	0.00409412	0.0371323	0.040882	0.0151453	0.00898481	0.0357832	0.0119231
	2.12987	0.738336															161	0.0192637	0.00609164	0.0360196	0.0490458	0.084236	0.00409412	0.03771	0.0392118	0.0149755	0.00913561	0.0354076	0.0119231
	6.92655	4.16357															162	0.0187993	0.00584726	0.0366318	0.048981	0.084426	0.00423137	0.038161	0.0367295	0.014876	0.00930912	0.0350796	0.0117263
	3.42334	3.43608															163	0.0188703	0.00561976	0.0355292	0.0489166	0.0842173	0.00418127	0.0387137	0.034312	0.0146989	0.00950541	0.0346331	0.0114774
	1.10873	0.971857															164	0.0183882	0.00549049	0.0361129	0.049036	0.0843368	0.00434127	0.0391365	0.0325126	0.0145965	0.00954321	0.0342547	0.011405
	0.906191	0.095594															165	0.0184476	0.00525434	0.034987	0.0489607	0.0840435	0.00441467	0.0396612	0.0311359	0.0144129	0.0097798	0.0337517	0.0112987
	0.454497	1.16654															166	0.017951	0.0050699	0.035539	0.0489153	0.0840956	0.00459787	0.0400521	0.0288756	0.0143079	0.0101093	0.033335	0.011242
	0.215053	6.81693															167	0.0180008	0.00503369	0.0343898	0.0487609	0.083724	0.00491415	0.0405466	0.0274879	0.0141188	0.0103469	0.0327888	0.0110978
	0.422473	2.56151															168	0.0174931	0.00486877	0.0349066	0.0486775	0.0837133	0.00481798	0.040902	0.0253684	0.0140116	0.0106373	0.0323443	0.0109384
	1.00107	1.92668															169	0.0175355	0.00476069	0.0337347	0.0485787	0.0832717	0.00528824	0.0413645	0.0237913	0.013818	0.010853	0.0317667	0.0109716
	1.8062	6.0754															170	0.0170204	0.00461563	0.0342129	0.0484733	0.0832033	0.00519097	0.041681	0.0218174	0.013709	0.011183	0.0313036	0.0108082
	0.277971	3.13715															171	0.0170574	0.00448296	0.0330195	0.0485974	0.082701	0.00562019	0.04211	0.0206501	0.013512	0.0114502	0.0307049	0.0106958
	0.818423	3.66633															172	0.0165387	0.00437139	0.0334559	0.0484989	0.0825811	0.00552285	0.0423846	0.0188137	0.0134017	0.0118732	0.0302304	0.0105267
	0.875903	1.49102															173	0.0165724	0.00434885	0.0322429	0.0483357	0.082028	0.00610292	0.0427789	0.0177539	0.0132024	0.0121505	0.0296196	0.0106003
	0.143344	1.21987															174	0.0160538	0.00426275	0.0326346	0.048117	0.0818625	0.00600669	0.0430087	0.016439	0.0130912	0.0125383	0.0291395	0.0104295
	9.08983	1.698															175	0.0160862	0.00417116	0.0314049	0.0479439	0.081269	0.0065417	0.0433672	0.0148353	0.0128909	0.012963	0.0285239	0.0103491
	2.17492	0.376772															176	0.0155714	0.00409182	0.0317498	0.0477546	0.0810637	0.00645016	0.0435494	0.0133295	0.0127793	0.0134071	0.0280428	0.0101778
	2.19668	0.89682															177	0.0156043	0.00405093	0.0305068	0.0475484	0.0804399	0.00703634	0.0438711	0.0124251	0.0125791	0.0138703	0.0274285	0.0101144
	1.62338	0.0542186															178	0.0150969	0.00399986	0.0308035	0.0475482	0.0802004	0.00733988	0.0440032	0.0110763	0.0124677	0.0141559	0.0269498	0.0100583
	5.51325	0.780567															179	0.0151321	0.00396831	0.0295519	0.0473002	0.0795562	0.00766685	0.0442871	0.0106174	0.0122689	0.014645	0.0263417	0.0100667
	1.07067	2.06046															180	0.0146355	0.00392327	0.0297999	0.0470975	0.0792875	0.00791769	0.0443664	0.00941322	0.0121581	0.0150121	0.0258678	0.00985617
	0.220977	3.45699															181	0.0146744	0.00388874	0.0285447	0.0468235	0.0786323	0.00826568	0.0446117	0.00831115	0.0119617	0.0155316	0.0252698	0.00987385
	0.673614	0.236726															182	0.0141916	0.00386433	0.0287448	0.0465301	0.0783387	0.00861685	0.044636	0.00731146	0.0118521	0.0160689	0.0248023	0.00983721
	3.68106	0.224279															183	0.0142357	0.00387372	0.0274918	0.0461834	0.077681	0.00897808	0.0448416	0.00687429	0.0116595	0.0164912	0.0242174	0.00985907
	3.45318	0.431047															184	0.0137696	0.00386813	0.0276456	0.0459005	0.0773662	0.00972073	0.0448086	0.00601076	0.0115517	0.0170781	0.0237572	0.00985668
	0.254994	2.84316															185	0.0138197	0.00384393	0.026401	0.0457277	0.076714	0.00967441	0.0449734	0.00561863	0.011364	0.0175226	0.0231877	0.00971727
	0.316838	2.36448															186	0.0133728	0.00384699	0.0265114	0.0453568	0.0763809	0.0104878	0.0448813	0.00492443	0.0112584	0.0181182	0.0227354	0.009865
	0.795591	0.694929															187	0.01343	0.00385828	0.0252817	0.0449295	0.0757415	0.0104518	0.0450042	0.00433049	0.0110769	0.0185899	0.022183	0.00973414
	1.38077	1.28229															188	0.0130044	0.00390164	0.0253522	0.0445198	0.0753924	0.0112484	0.0448513	0.00402925	0.0109741	0.0192157	0.0217386	0.00976062
	1.02978	2.04276															189	0.0130692	0.00392782	0.0241441	0.0441521	0.0747722	0.0112359	0.0449311	0.00356792	0.0108	0.0198605	0.0212044	0.00964915
	1.11362	1.49582															190	0.0126668	0.00396068	0.0241792	0.0437094	0.0744089	0.0120577	0.044716	0.00320361	0.0107007	0.0205149	0.0207677	0.0097947
	0.819867	1.99098															191	0.0127396	0.00393625	0.0229991	0.0432504	0.0738137	0.0120583	0.0447518	0.00313617	0.0105352	0.0211853	0.0202525	0.00969383
	0.73602	1.77089															192	0.0123616	0.00397526	0.0230039	0.0427347	0.0734371	0.0128877	0.0444737	0.00292788	0.0104401	0.0217211	0.019823	0.00974441
	2.26746	1.22225															193	0.0124425	0.00398628	0.021858	0.0423554	0.0728721	0.0129171	0.0444644	0.00276394	0.0102844	0.0222591	0.0193274	0.00966591
	0.291599	4.7208															194	0.0120901	0.00409383	0.0218382	0.0420508	0.0724828	0.013717	0.0441227	0.00267201	0.0101942	0.0227788	0.0189045	0.00979872
	0.343153	1.21106															195	0.0121792	0.00414802	0.0207323	0.0416676	0.0719526	0.0141755	0.0440677	0.00267397	0.0100496	0.0234756	0.0184286	0.00975088
	1.6902	0.601513															196	0.0118528	0.00420623	0.0206938	0.0411032	0.0715507	0.0146007	0.0436625	0.002761	0.00996498	0.0240525	0.0180117	0.00979906
	1.31251	1.99381															197	0.0119499	0.00418232	0.019633	0.0405722	0.0710594	0.0150852	0.0435612	0.00298174	0.00983262	0.0248002	0.0175554	0.00977796
	2.1383	1.95177															198	0.01165	0.00421635	0.0195819	0.0400327	0.0706447	0.0154262	0.0430933	0.00305943	0.0097546	0.0255633	0.0171439	0.00986579
	2.414	0.795517															199	0.0117546	0.00428369	0.018571	0.0394867	0.0701959	0.0159169	0.0429457	0.00333571	0.00963569	0.0263416	0.016707	0.00985829
	1.22378	0.909282															200	0.0114811	0.00440009	0.0185133	0.0389802	0.0697679	0.0163447	0.0424163	0.00350259	0.00956517	0.0269555	0.0163	0.00990816
	1.202	9.17689															201	0.0115929	0.00446949	0.0175561	0.0384472	0.0693647	0.0171414	0.042223	0.00389925	0.00946089	0.0275618	0.0158823	0.00997835
	9.79438	1.11451															202	0.0113455	0.00454055	0.0174979	0.0378802	0.0689226	0.0172906	0.0416343	0.00436506	0.00939888	0.028377	0.0154793	0.00997751
	6.2482	2.45629															203	0.0114639	0.00459638	0.0165976	0.0373138	0.0685677	0.0179051	0.0413962	0.00467014	0.00931035	0.0292071	0.0150801	0.010042
	1.43386	0.493849															204	0.0112418	0.00457727	0.0165448	0.03675	0.0681107	0.0180725	0.040751	0.00515491	0.00925792	0.030052	0.0146806	0.0100508
	1.43505	0.172007															205	0.0113662	0.00465442	0.015704	0.036191	0.0678066	0.0188151	0.0404699	0.00577111	0.00918623	0.0309115	0.0142994	0.0101158
	0.850133	0.179382															206	0.0111687	0.00475942	0.0156621	0.0356593	0.0673337	0.0190183	0.0397721	0.00614221	0.00914452	0.031564	0.0139028	0.0101423
	0.991708	0.62745															207	0.0112985	0.00483308	0.0148827	0.0354622	0.0670823	0.0195127	0.0394504	0.00684929	0.00909067	0.0319879	0.0135391	0.0101711
	0.637737	1.35596															208	0.0111245	0.00490573	0.014857	0.0349167	0.0665925	0.0197333	0.0387045	0.00731701	0.00906084	0.0328769	0.0131451	0.0102056
	1.74334	1.70548															209	0.011259	0.00498304	0.0141402	0.0343829	0.0663954	0.0203974	0.0383456	0.00811032	0.00902576	0.0337795	0.012798	0.010258
	2.28837	0.971533															210	0.0111073	0.00496608	0.0141358	0.0337944	0.0658878	0.0208938	0.037557	0.0087751	0.00900898	0.0345106	0.0124064	0.0103193
	1.43375	1.05733															211	0.0112458	0.00505172	0.0134823	0.0332866	0.0657462	0.0210055	0.0371649	0.00926401	0.00899347	0.0354367	0.0120752	0.010299
	0.194288	0.876552															212	0.011115	0.00512305	0.0135038	0.0327965	0.0652201	0.0214797	0.0363396	0.0101548	0.00899091	0.0363749	0.011686	0.0103614
	0.1526	1.41998															213	0.0112569	0.00521042	0.0129138	0.03243	0.0651348	0.0218368	0.0359193	0.0107491	0.00899564	0.0372558	0.0113699	0.0103884
	0.275671	0.602104															214	0.0111456	0.00528401	0.0129656	0.0318653	0.0645895	0.0222986	0.0350641	0.0117033	0.00900841	0.038019	0.0109832	0.0104557
	0.431264	6.59563															215	0.0112904	0.00535625	0.0124386	0.031343	0.0645608	0.0223343	0.0346211	0.0126889	0.0090339	0.0387939	0.0106814	0.0104114
	3.10382	5.12588															216	0.0111971	0.0053415	0.0125248	0.0309682	0.0639958	0.022766	0.0337434	0.0134751	0.009063	0.0396883	0.0102975	0.0104774
	2.9325	1.30702															217	0.011344	0.00539619	0.0120601	0.0305705	0.0640236	0.023083	0.0332838	0.0140533	0.00910959	0.0406667	0.0100092	0.0104953
	4.13242	0.770813															218	0.0112671	0.00549632	0.0121842	0.0302004	0.0634389	0.0234517	0.0323912	0.0147413	0.00915591	0.0416519	0.00962863	0.0104988
	5.18539	1.67959															219	0.0114156	0.00556407	0.0117806	0.0298716	0.0635224	0.0234517	0.0319217	0.0158016	0.00922371	0.0423575	0.00935309	0.0104988
	2.11408	2.28437															220	0.0113537	0.00563028	0.0119461	0.0298483	0.0629181	0.0237472	0.031022	0.0168801	0.00928795	0.0431209	0.00897656	0.0104916
	1.15351	2.13352															221	0.0115033	0.00569499	0.0116021	0.0295609	0.0630562	0.0240891	0.0305494	0.0179741	0.00937685	0.0441126	0.00871304	0.0105721
	1.71663	1.47942															222	0.0114547	0.00573197	0.0118118	0.0291003	0.0624327	0.0243149	0.0296504	0.0184697	0.00945947	0.0449369	0.00834151	0.0105568
	0.495182	1.52457															223	0.0116048	0.00575827	0.0115253	0.0288668	0.0626233	0.0243149	0.0291818	0.0190803	0.00956909	0.0459337	0.00808942	0.0105568
	1.20007	3.01244															224	0.0115681	0.00582021	0.0117818	0.0286604	0.0619815	0.0244648	0.0282912	0.0201959	0.0096703	0.0466259	0.00772404	0.0105323
	2.94785	1.03742															225	0.011718	0.00588092	0.0115507	0.0284898	0.0622223	0.0248145	0.0278333	0.021318	0.00979996	0.0476105	0.0074829	0.0106166
	0.713821	1.94714															226	0.0116917	0.00594055	0.0118561	0.0283537	0.0615631	0.0248884	0.0269583	0.022444	0.00991963	0.0485868	0.00712502	0.0105845
	3.20929	2.49086															227	0.011841	0.00606125	0.0116775	0.0282028	0.0618509	0.0250926	0.0265178	0.0232352	0.0100684	0.0494402	0.00689455	0.0106386
	4.7357	0.21358															228	0.0118235	0.00606034	0.0120336	0.0281257	0.0611756	0.0248869	0.0256652	0.0241003	0.010206	0.0503893	0.00654574	0.0105452
	5.59695	0.210014															229	0.0119717	0.00605721	0.0119043	0.0276795	0.0615067	0.0250454	0.0252483	0.0246971	0.0103726	0.0510344	0.00632588	0.0105964
	3.78643	0.41561															230	0.0119616	0.00611462	0.0123122	0.0277829	0.0608167	0.0251473	0.024424	0.0258192	0.0105273	0.0518265	0.00598787	0.0105843
	2.28251	0.150234															231	0.012108	0.00617168	0.0122287	0.0277994	0.0611867	0.0252529	0.0240363	0.0269352	0.01071	0.0527273	0.00577882	0.0106321
	3.27525	0.17053															232	0.0121038	0.00630051	0.0126888	0.0278503	0.0604834	0.0249937	0.0232458	0.027742	0.0108807	0.0536007	0.00545357	0.0105334
	1.45842	0.457353															233	0.0122478	0.00635928	0.012647	0.0277598	0.0608874	0.0250536	0.0228924	0.0288504	0.0110776	0.054293	0.00525584	0.0105788
	0.395046	0.43817															234	0.0122482	0.00636849	0.0131594	0.028076	0.0601722	0.0250784	0.0221401	0.0296803	0.0112624	0.054916	0.00494542	0.0105599
	1.36494	0.666392															235	0.0123891	0.00634301	0.0131546	0.0282092	0.0606047	0.0247781	0.0218254	0.0302249	0.0114713	0.0556993	0.00475985	0.0105009
	0.381605	0.57742															236	0.0123928	0.00640095	0.0137183	0.0282416	0.0598788	0.0247781	0.0211151	0.0312953	0.0116683	0.056251	0.00446649	0.0105009
	0.56547	0.870652															237	0.0125298	0.00653657	0.0137455	0.0282949	0.0603339	0.0244156	0.0208428	0.0320969	0.0118865	0.0568606	0.00429426	0.0104401
	0.683457	1.36129															238	0.0125353	0.00659682	0.0143589	0.0283073	0.0595979	0.0246819	0.0201774	0.0331467	0.0120932	0.0574248	0.00402029	0.0105161
	0.130225	3.87353															239	0.0126678	0.00665798	0.0144122	0.0285458	0.0600693	0.0242458	0.0199504	0.0341773	0.012318	0.0580439	0.00386293	0.0104524
	0.441515	1.95694															240	0.0126737	0.00658051	0.0150729	0.0288114	0.0593238	0.0242458	0.0193321	0.0344022	0.0125316	0.0586034	0.00361071	0.0104524
	0.400692	3.24027															241	0.0128008	0.00664307	0.0151462	0.0291025	0.0598047	0.0237561	0.0191529	0.0353977	0.0127599	0.0590983	0.00347006	0.010389
	0.856054	10.8823															242	0.0128059	0.00678413	0.0158507	0.0293153	0.0590493	0.0235819	0.0185831	0.0361749	0.0129775	0.0592924	0.00324198	0.0104257
	5.5525	1.47066															243	0.0129266	0.00684958	0.0159373	0.0294278	0.059533	0.0234143	0.0184534	0.0371389	0.0132062	0.0597568	0.00312014	0.0103928
	3.06719	2.08003															244	0.0129297	0.00691684	0.0166813	0.0297887	0.0587667	0.0230107	0.0179329	0.0380777	0.0134244	0.0600697	0.00291845	0.0103643
	0.771806	3.60288															245	0.0130431	0.00698621	0.0167741	0.0301692	0.0592461	0.0228143	0.0178539	0.0389904	0.0136503	0.0603023	0.00281769	0.0103299
	0.388101	7.60473															246	0.0130429	0.00691268	0.0175525	0.0305672	0.0584675	0.0225559	0.017383	0.0391403	0.0138659	0.0604511	0.00264449	0.0103652
	0.784514	8.33127															247	0.0131481	0.00705779	0.0176443	0.0308256	0.0589355	0.0223117	0.0173553	0.0398755	0.0140858	0.0605089	0.00256714	0.010326
	2.25652	0.906775															248	0.0131434	0.00713188	0.0184511	0.0311387	0.0581424	0.0218911	0.0169337	0.0407323	0.0142954	0.0603291	0.00242422	0.010307
	0.401886	0.16128															249	0.0132392	0.00720853	0.0185345	0.0315593	0.0585921	0.0216213	0.0169576	0.0415593	0.0145061	0.060269	0.00237251	0.0102664
	0.441014	0.342467															250	0.0132289	0.00728803	0.019363	0.0318413	0.0577818	0.0212898	0.0165844	0.042356	0.0147065	0.0603138	0.00226125	0.0103018
	3.50096	0.334383															251	0.0133145	0.00737043	0.0194308	0.0322939	0.0582067	0.0209744	0.0166595	0.0431212	0.0149052	0.0600852	0.00223717	0.0102557
	8.20824	1.42129															252	0.0132974	0.00737043	0.0202736	0.0325105	0.057376	0.0202151	0.0163338	0.0431212	0.0150934	0.0599375	0.00215835	0.0102017
	6.46791	0.185406															253	0.0133718	0.00745596	0.0203189	0.0330735	0.0577701	0.0202151	0.0164595	0.0438546	0.0152774	0.0593288	0.00216348	0.0102017
	2.9368	0.174309															254	0.0133471	0.00754464	0.0211683	0.0335372	0.056916	0.0194407	0.0161797	0.0445551	0.0154506	0.0588506	0.00211722	0.0101537
	4.17195	0.334285															255	0.0134093	0.00763672	0.0211848	0.034001	0.0572739	0.0194445	0.0163547	0.0452223	0.0156177	0.0582829	0.00215254	0.0101843
	0.617147	0.50534															256	0.013376	0.00773216	0.0220327	0.034231	0.0563935	0.0186386	0.0161192	0.0458554	0.0157735	0.0578707	0.00213815	0.010138
	0.84999	0.589254															257	0.0134251	0.007881	0.0220147	0.0346939	0.0567109	0.0186386	0.0163421	0.0464422	0.0159218	0.0571502	0.00220391	0.010138
	1.20197	0.381515															258	0.0133827	0.00783119	0.0228532	0.0348879	0.0558019	0.0178287	0.0161488	0.0464544	0.0160583	0.0567744	0.00221985	0.0100988
	1.96759	0.322342															259	0.0134179	0.00793375	0.0227959	0.0354296	0.0560756	0.0173841	0.0164176	0.0470182	0.0161864	0.0557222	0.0023155	0.0101413
	0.547396	1.32657															260	0.0133658	0.00804005	0.023617	0.0358599	0.0551367	0.0169374	0.0162643	0.0475472	0.0163019	0.05494	0.00235932	0.0100763
	0.297067	1.40257															261	0.0133864	0.00818837	0.0235166	0.0360939	0.0553651	0.0165711	0.0165768	0.0480707	0.0164088	0.0542568	0.00248345	0.0101143
	0.182251	3.06782															262	0.0133244	0.00829804	0.0243128	0.0365235	0.0543958	0.0161138	0.016461	0.048542	0.0165026	0.0532117	0.00255191	0.0100473
	0.279676	0.736566															263	0.0133299	0.00841134	0.0241666	0.0369375	0.0545787	0.0156435	0.0168144	0.048977	0.0165876	0.0521015	0.00270227	0.0100925
	1.06708	1.35316															264	0.0132576	0.00838127	0.0249308	0.0373338	0.0535803	0.0151579	0.0167336	0.0489199	0.016659	0.0509313	0.00279136	0.0100171
	0.752892	1.41633															265	0.0132476	0.00850268	0.0247369	0.0376179	0.053719	0.014833	0.0171248	0.0493059	0.016722	0.0501652	0.00296498	0.0100767
	0.222855	1.90269															266	0.0131654	0.00864918	0.0254628	0.0379923	0.052694	0.0143417	0.0170763	0.0497379	0.016771	0.0489072	0.00307016	0.00999921
	0.130441	1.05621															267	0.0131396	0.00877378	0.0252206	0.038343	0.0527914	0.013546	0.0175017	0.0500639	0.0168123	0.047604	0.00326347	0.00999067
	0.507245	2.4395															268	0.0130476	0.0089021	0.0259025	0.0386681	0.0517437	0.0133465	0.0174827	0.0503533	0.0168392	0.0462614	0.00337983	0.00996011
	0.274016	6.24035															269	0.013006	0.00888064	0.0256122	0.0388464	0.0518041	0.0127748	0.0179384	0.050386	0.0168593	0.0451407	0.00358886	0.00999177
	0.143592	0.373578															270	0.0129047	0.00902661	0.0262453	0.0390303	0.0507388	0.0125579	0.0179459	0.0504892	0.0168648	0.0440375	0.00371141	0.00995397
	0.491707	2.48875															271	0.0128474	0.00917025	0.025908	0.0393174	0.0507672	0.0117985	0.0184277	0.0508235	0.0168644	0.0426204	0.003932	0.00995761
	0.576895	4.68355															272	0.0127374	0.0093101	0.0264883	0.0396345	0.0496903	0.0115492	0.0184588	0.0510046	0.0168495	0.0413865	0.00405584	0.00990498
	0.271385	5.82137															273	0.0126647	0.00945372	0.0261058	0.0398427	0.0496927	0.011072	0.0189619	0.0511498	0.0168297	0.0399343	0.00428383	0.00997117
	1.65673	3.85032															274	0.0125468	0.00960128	0.0266303	0.0399377	0.0486108	0.0108077	0.0190135	0.0512597	0.0167955	0.0388097	0.00440437	0.00991104
	2.05408	0.132984															275	0.0124591	0.00959128	0.0262051	0.0400477	0.0485934	0.0101035	0.019533	0.0512024	0.0167574	0.0376091	0.0046358	0.00992709
	0.413787	2.62808															276	0.0123341	0.00975263	0.0266714	0.0401659	0.0475132	0.00965169	0.0196019	0.0513341	0.0167055	0.0361409	0.00474895	0.00997789
	NaN	2.41657															277	0.012232	0.00990797	0.0262065	0.0402425	0.0474822	0.0091364	0.0201326	0.051374	0.0166502	0.0348117	0.00498017	0.00987066
	0.74701	9.17951															278	0.0121008	0.0100672	0.0266132	0.0402816	0.0464103	0.00900716	0.0202158	0.0513792	0.016582	0.0333807	0.00508242	0.0100059
	0.348402	0.857783															279	0.0119851	0.0102304	0.0261121	0.0404619	0.0463715	0.00850596	0.0207521	0.0513507	0.0165108	0.0325403	0.00531023	0.00989939
	0.480045	2.01723															280	0.0118485	0.0103977	0.0264584	0.040464	0.0453142	0.00808344	0.0208463	0.0512882	0.0164278	0.0311128	0.00539873	0.00994632
	3.70075	1.01501															281	0.01172	0.0103643	0.0259247	0.0404261	0.045273	0.00759021	0.0213827	0.0513478	0.016342	0.029709	0.0056204	0.00983488
	3.67046	0.835837															282	0.011579	0.0105691	0.0262108	0.0403323	0.0442358	0.00752451	0.0214847	0.051193	0.0162458	0.0285279	0.00569297	0.00998512
	2.08352	9.22232															283	0.0114387	0.0107446	0.0256483	0.0402115	0.0441967	0.0070521	0.0220153	0.051065	0.0161465	0.0271944	0.00590626	0.00987677
	0.904223	3.94216															284	0.0112941	0.0109245	0.0258748	0.040143	0.0431845	0.00656999	0.0221219	0.0509053	0.0160386	0.0260512	0.00596136	0.00992815
	1.10914	4.32594															285	0.011143	0.0111087	0.0252877	0.0399566	0.0431514	0.00621727	0.0226408	0.0507139	0.015927	0.0247737	0.00616451	0.00980835
	0.966613	2.12504															286	0.0109957	0.0112471	0.0254558	0.0397296	0.0421681	0.00614698	0.0227488	0.0507185	0.0158088	0.0235358	0.00620122	0.00998837
	10.2272	0.946388															287	0.010835	0.0112524	0.0248481	0.0395606	0.042144	0.00579068	0.0232503	0.0505078	0.0156859	0.0227313	0.00639289	0.00986429
	6.50945	6.30854															288	0.0106858	0.0114909	0.0249596	0.039241	0.041193	0.00542775	0.0233561	0.0502399	0.015559	0.0217915	0.00641077	0.00992908
	1.61932	1.52792															289	0.0105167	0.0116892	0.0243354	0.039049	0.04118	0.00506879	0.0238345	0.0499585	0.0154258	0.0207755	0.00659001	0.00979888
	0.643789	1.63843															290	0.0103664	0.0118923	0.0243927	0.0388695	0.0402638	0.00513164	0.0239348	0.049648	0.0152913	0.0198266	0.00658909	0.0100019
	0.270591	0.532698															291	0.0101902	0.0120357	0.0237561	0.0384806	0.0402635	0.00486871	0.0243846	0.0495552	0.0151488	0.018779	0.00675523	0.0100235
	7.1732	0.499276															292	0.0100395	0.0120477	0.0237617	0.0380541	0.039384	0.00455027	0.0244757	0.0492913	0.015008	0.0177805	0.00673589	0.00994899
	2.20375	1.51979															293	0.00985773	0.0122596	0.0231167	0.0377691	0.0393975	0.00432614	0.0248915	0.0489175	0.0148571	0.0169009	0.00688852	0.00996321
	0.439514	1.35974															294	0.00970757	0.0125328	0.0230737	0.0374491	0.038556	0.0044014	0.0249698	0.048552	0.0147109	0.0162453	0.00685141	0.0100347
	0.120428	1.20971															295	0.00952163	0.012757	0.0224242	0.0369279	0.0385838	0.00421461	0.0253466	0.0481337	0.0145524	0.0153768	0.00699031	0.0100402
	0.407193	0.540409															296	0.00937282	0.012911	0.022336	0.0363728	0.0377813	0.00399442	0.0254084	0.047948	0.014402	0.0145592	0.00693629	0.00999776
	2.36126	NaN															297	0.00918433	0.0131445	0.0216858	0.0357851	0.0378235	0.00385661	0.0257415	0.0474821	0.0142366	0.0137926	0.00706135	0.00999648
	3.68261	0.351378															298	0.00903778	0.0131637	0.0215559	0.0353749	0.0370606	0.00401388	0.0257829	0.0471659	0.0140828	0.0131052	0.00699142	0.0100963
	2.50106	0.409904															299	0.0088484	0.0134045	0.0209088	0.0347322	0.0371172	0.00391794	0.026068	0.0466679	0.0139114	0.0124309	0.00710263	0.0100836
	1.93647	0.279283															300	0.00870511	0.0136299	0.020741	0.0343261	0.0363943	0.00382008	0.0260853	0.0464794	0.013755	0.0122477	0.00701789	0.0100846
	1.63554	0.147273															301	0.00851655	0.013882	0.0201004	0.0338363	0.0364651	0.00402867	0.0263185	0.0459441	0.0135784	0.0116457	0.00711527	0.0101946
	1.32656	4.63635															302	0.0083776	0.0141402	0.0198986	0.0333501	0.0357825	0.00376606	0.0263078	0.0453864	0.0134202	0.0110917	0.00701686	0.0100961
	0.104332	6.8831															303	0.00819165	0.0144047	0.019268	0.0326195	0.0358673	0.00432877	0.0264858	0.0448081	0.0132392	0.0105767	0.00710048	0.0103049
	0.303044	6.29767															304	0.00805817	0.0144281	0.0190363	0.0318652	0.0352251	0.00408733	0.0264437	0.0444572	0.01308	0.0101103	0.00698953	0.0102151
	3.51435	3.05221															305	0.00787664	0.0146136	0.0184189	0.0310891	0.0353238	0.00450372	0.0265637	0.0441141	0.0128953	0.00969189	0.00705944	0.0103332
	3.45576	2.91051															306	0.00774984	0.0148902	0.0181616	0.0303019	0.0347222	0.00431124	0.0264868	0.0434901	0.0127357	0.00947828	0.00693709	0.010263
	1.28487	2.36995															307	0.00757454	0.0152341	0.0175603	0.0297245	0.0348348	0.00501596	0.0265468	0.0429519	0.0125485	0.00911763	0.00699336	0.0104483
	1.26159	1.51688															308	0.00745566	0.0155221	0.0172817	0.0290932	0.034274	0.00519701	0.0264322	0.0422955	0.0123893	0.0087978	0.00686069	0.0103746
	1.56545	0.064392															309	0.0072884	0.0158151	0.0166995	0.0282519	0.0344005	0.00548886	0.0264308	0.0416208	0.0122004	0.00854668	0.00690335	0.0105095
	9.55813	0.0834969															310	0.00717868	0.015754	0.016404	0.0273977	0.0338807	0.00575205	0.0262763	0.0415068	0.0120423	0.00834041	0.0067614	0.0104283
	3.0057	0.0747016															311	0.0070212	0.0160523	0.0158436	0.0268249	0.0340217	0.00622291	0.0262131	0.0408109	0.011853	0.00813597	0.0067905	0.0106235
	0.706261	0.192106															312	0.00692188	0.016355	0.0155355	0.0262054	0.0335433	0.00653788	0.026017	0.0400985	0.0116969	0.00807267	0.00664022	0.0105231
	1.8371	0.314478															313	0.00677583	0.0167217	0.0149994	0.0253214	0.0336994	0.00701615	0.0258922	0.0394963	0.0115083	0.00797296	0.00665579	0.010714
	1.97501	0.686941															314	0.00668807	0.0170311	0.0146835	0.0245029	0.0332628	0.00741846	0.0256536	0.0387561	0.0113551	0.00798095	0.00649808	0.0106052
	7.09599	0.426438															315	0.00655501	0.0172667	0.014174	0.0236143	0.0334351	0.00797011	0.0254686	0.0382384	0.0111687	0.00795674	0.00650017	0.0108202
	4.75389	0.165821															316	0.00647987	0.0172841	0.013855	0.0231426	0.0330408	0.00842271	0.0251877	0.0378685	0.0110193	0.00785205	0.00633584	0.0106916
	5.54888	0.427422															317	0.00636119	0.0175984	0.0133743	0.0222818	0.0332307	0.00908743	0.0249448	0.0370962	0.0108367	0.00799691	0.00632452	0.0109324
	4.56215	2.31259															318	0.00629962	0.0179138	0.0130569	0.021391	0.0328794	0.0102427	0.0246224	0.0363106	0.0106924	0.00808075	0.00615432	0.0110238
	1.92726	0.304941															319	0.00619655	0.0182865	0.0126071	0.0205036	0.0330888	0.0102427	0.0243247	0.0356545	0.0105153	0.00820476	0.00612969	0.0110238
	0.500828	0.0815545															320	0.00614932	0.0185362	0.0122963	0.0196216	0.0327813	0.0114656	0.0239629	0.0350619	0.0103773	0.0083685	0.00595431	0.0111009
	0.270505	0.16674															321	0.00606288	0.0185434	0.0118793	0.0189728	0.0330123	0.0116611	0.0236145	0.0347021	0.0102078	0.00847282	0.00591653	0.0111481
	0.360259	4.06019															322	0.00603058	0.0188554	0.0115803	0.0183174	0.0327496	0.0129779	0.0232161	0.0338808	0.0100775	0.00854989	0.0057366	0.0112191
	0.750358	6.22688															323	0.00596159	0.0191642	0.011198	0.0176645	0.0330048	0.0134044	0.0228218	0.0330493	0.00991755	0.00881915	0.00568591	0.0109717
	2.56299	7.16466															324	0.00594462	0.0194681	0.010916	0.016808	0.0327881	0.0143354	0.0223905	0.0322084	0.00979665	0.00911155	0.00550202	0.0112746
	2.56338	0.848406															325	0.00589367	0.0197739	0.0105701	0.0161836	0.0330706	0.015061	0.0219559	0.0317012	0.00964855	0.00932603	0.00543877	0.0110755
	0.953537	1.5333															326	0.00589222	0.0200687	0.0103107	0.015355	0.032901	0.0160576	0.021496	0.0308394	0.00953877	0.00968823	0.00525152	0.011393
	0.8878	2.86064															327	0.00585968	0.0200567	0.0100028	0.0146533	0.0332142	0.0168357	0.0210271	0.0305029	0.0094049	0.0100681	0.00517616	0.0111863
	0.753735	0.75778															328	0.00587371	0.0203385	0.00977181	0.0138625	0.0330931	0.0174787	0.0205438	0.0296406	0.00930813	0.0104988	0.00498615	0.0114247
	1.15825	0.286553															329	0.00585972	0.0206096	0.00950358	0.0131477	0.0334408	0.0182683	0.0200471	0.0287736	0.00919091	0.0109998	0.0048993	0.0112057
	0.72464	0.9153															330	0.00588898	0.0208426	0.00930687	0.0127514	0.0333698	0.0193099	0.0195457	0.0280569	0.00910913	0.0113039	0.00470719	0.0115363
	0.203299	0.168001															331	0.00589344	0.0211455	0.00907978	0.0120226	0.0337561	0.0201244	0.0190279	0.0273436	0.00901097	0.0118335	0.00460966	0.0113115
	0.0460283	0.13567															332	0.00593747	0.0213812	0.00892353	0.0114168	0.0337366	0.0207069	0.0185143	0.0264647	0.00894619	0.0121028	0.00441619	0.0115444
	0.318024	0.324137															333	0.0059601	0.0213452	0.00873891	0.0107279	0.0341657	0.0215134	0.0179823	0.0261587	0.00886939	0.0126866	0.00430899	0.0113114
	1.67237	0.243239															334	0.00601824	0.0215591	0.00862945	0.0100683	0.0341993	0.0225246	0.0174624	0.0252874	0.00882356	0.0133049	0.00411505	0.0116449
	6.24693	0.575194															335	0.00605852	0.0217514	0.00848843	0.00968778	0.0346757	0.0238044	0.0169232	0.0245374	0.00877018	0.013803	0.00399943	0.0116319
	6.68242	0.214381															336	0.00612992	0.0219335	0.00843212	0.00908732	0.0347637	0.0238044	0.0164032	0.0236648	0.00874511	0.0144776	0.00380608	0.0116319
	3.27445	6.14867															337	0.00618715	0.0221435	0.00833549	0.00863238	0.0352918	0.024992	0.0158637	0.0229769	0.00871686	0.015137	0.00368359	0.0116093
	2.29239	11.8394															338	0.00627077	0.0222819	0.00833867	0.0080937	0.0354355	0.0254804	0.0153495	0.0221205	0.00871409	0.015878	0.00349212	0.0117193
	0.990251	0.214542															339	0.00634408	0.0222206	0.00828676	0.00776624	0.0360193	0.0265577	0.0148166	0.0218481	0.00871218	0.0164816	0.0033646	0.0116896
	0.299659	0.447897															340	0.00643873	0.02235	0.00835553	0.00735297	0.0362195	0.0267674	0.0143141	0.0210919	0.00873282	0.0172107	0.00317657	0.0113397
	0.448544	0.618999															341	0.00652704	0.0224416	0.00834802	0.00697104	0.0368628	0.0275135	0.0137944	0.0202549	0.00875785	0.0180026	0.0030462	0.0116538
	1.17608	1.94944															342	0.00663137	0.0225083	0.00848804	0.00656682	0.0371195	0.0281489	0.0133096	0.0194312	0.0088025	0.0188455	0.00286348	0.0114185
	0.0900586	1.2461															343	0.00673346	0.0225942	0.00852374	0.00616021	0.0378252	0.0287884	0.0128096	0.0188091	0.00885432	0.0192432	0.00273278	0.0117235
	0.0393299	0.2															344	0.00684598	0.0225492	0.00873999	0.005978	0.0381378	0.0289203	0.0123478	0.0186221	0.00892291	0.0199408	0.00255759	0.011385
	0.0363248	1.06228															345	0.00696047	0.0225641	0.00881668	0.00574316	0.038908	0.0294611	0.0118738	0.0178292	0.00900057	0.0208105	0.00242944	0.0116805
	0.243834	1.14699															346	0.00707958	0.0225525	0.00911314	0.00552763	0.0392746	0.0299625	0.0114405	0.0170538	0.00909228	0.0216643	0.00226433	0.011459
	1.88384	0.524477															347	0.00720493	0.0225145	0.00922737	0.00529693	0.04011	0.0303778	0.0109985	0.0162971	0.00919396	0.0225876	0.00214194	0.0117419
	1.83504	1.48253															348	0.00732888	0.0224501	0.00960672	0.00525032	0.0405272	0.0304342	0.0105984	0.0155604	0.00930717	0.0233482	0.00198979	0.0114269
	0.242331	0.528439															349	0.00746344	0.0224526	0.00975373	0.0050975	0.0414266	0.0307468	0.0101942	0.0150676	0.00943025	0.024293	0.00187667	0.0116984
	0.24377	0.245378															350	0.00759041	0.0223599	0.0102171	0.00498645	0.0418894	0.031096	0.00983196	0.0148444	0.00956253	0.0252419	0.00174062	0.0114987
	0.478185	0.281451															351	0.00773238	0.0222441	0.0103908	0.00491734	0.0428499	0.0312776	0.00947104	0.0141502	0.00970362	0.0261899	0.00164048	0.0117546
	0.0619011	1.39986															352	0.00786044	0.0221037	0.0109376	0.00496238	0.0433512	0.0313509	0.00915073	0.0134782	0.00985181	0.0270303	0.00152384	0.0117173
	0.120468	1.15493															353	0.00800793	0.0219394	0.0111307	0.00493705	0.0443675	0.0313509	0.00883827	0.0128291	0.010007	0.0272691	0.00144054	0.0117173
	2.23433	1.29237															354	0.00813511	0.0218165	0.0117585	0.00490658	0.044898	0.0313031	0.00856351	0.0122126	0.0101673	0.0281341	0.00134664	0.0116876
	0.633996	2.16895															355	0.00828614	0.0216445	0.0119626	0.00496969	0.0459622	0.0314403	0.00830434	0.0117965	0.0103321	0.0290438	0.001284	0.0115376
	0.158215	2.60631															356	0.00841038	0.0215438	0.0126671	0.00507473	0.0465104	0.031313	0.00807823	0.0116011	0.0105004	0.029929	0.00121605	0.0117477
	0.0611386	1.07736															357	0.00856293	0.021315	0.0128732	0.00522154	0.0476125	0.0312278	0.00787679	0.0110226	0.0106704	0.0307829	0.00117769	0.0115398
	0.390442	1.76659															358	0.00868219	0.0210674	0.0136485	0.00552465	0.0481648	0.0310213	0.0077019	0.010468	0.0108422	0.0313313	0.00113853	0.0117344
	0.869174	2.02294															359	0.00883419	0.0208716	0.0138474	0.00574448	0.0492922	0.0310233	0.00756221	0.00993174	0.011013	0.0321466	0.00112771	0.0116256
	0.933957	2.52156															360	0.00894643	0.020591	0.014686	0.00599828	0.0498331	0.0307138	0.00744049	0.00942201	0.0111839	0.0328778	0.00111963	0.0117992
	0.519213	3.23422															361	0.00909587	0.0203232	0.0148685	0.00629247	0.0509713	0.0305984	0.0073661	0.00911545	0.0113514	0.0335523	0.001139	0.0116515
	1.35077	1.33825															362	0.00919912	0.0202275	0.015762	0.00671309	0.0514844	0.0302256	0.00729889	0.00894623	0.0115172	0.0341065	0.00116352	0.0118084
	4.92888	3.11999															363	0.00934404	0.0199206	0.0159193	0.0070817	0.0526176	0.0301134	0.0072928	0.00848595	0.0116779	0.0346694	0.001215	0.0117472
	1.84128	3.4353															364	0.00943645	0.0196691	0.0168581	0.00720838	0.0530855	0.0296562	0.00728079	0.00803566	0.011835	0.0346929	0.00127268	0.011881
	1.17481	1.65188															365	0.00957504	0.0193405	0.0169822	0.00763671	0.0541974	0.0295256	0.00734539	0.00762038	0.0119858	0.0351458	0.00135728	0.0118017
	0.325573	7.67915															366	0.00965495	0.0190043	0.0179565	0.00808473	0.0546036	0.0290208	0.00738859	0.00722802	0.0121311	0.0355879	0.00144763	0.0119175
	0.332467	8.60729															367	0.00978557	0.0186792	0.0180399	0.00849928	0.0556781	0.0283419	0.00752558	0.00701325	0.0122699	0.0359254	0.00156538	0.0119727
	0.473279	1.03236															368	0.00985156	0.0186031	0.0190393	0.00902694	0.056007	0.0282487	0.0076233	0.00687351	0.0124009	0.0361677	0.0016868	0.0120005
	2.80312	1.32156															369	0.00997284	0.0183148	0.0190756	0.00959136	0.0570294	0.0276287	0.00783362	0.00651112	0.0125263	0.0363238	0.00183673	0.0120472
	3.73524	3.41736															370	0.0100238	0.0179647	0.0200893	0.0101106	0.0572678	0.0275126	0.00798447	0.00618608	0.0126414	0.0361424	0.00198661	0.0120682
	0.219065	5.18913															371	0.0101346	0.0176131	0.0200729	0.0107847	0.0582253	0.026752	0.00826821	0.00588298	0.0127525	0.0362211	0.00216681	0.0121561
	0.0824938	5.33574															372	0.0101698	0.0172613	0.0210901	0.0114373	0.058363	0.0264691	0.0084701	0.00560169	0.0128506	0.0361372	0.00234161	0.0122392
	0.790962	4.42997															373	0.0102695	0.0172186	0.0210159	0.012123	0.0592457	0.0259745	0.00882637	0.00561577	0.0129472	0.0359703	0.00254939	0.0122645
	0.12755	2.45249															374	0.0102885	0.0169108	0.0220255	0.0124978	0.0592758	0.0256797	0.0090765	0.00534202	0.013028	0.0360208	0.00274489	0.0123816
	0.0999475	1.95669															375	0.0103767	0.0165625	0.0218893	0.0131111	0.0600768	0.0249937	0.00950342	0.00510391	0.0131103	0.0354853	0.00297694	0.0123863
	0.179283	2.34138															376	0.0103797	0.0162179	0.0228799	0.0139038	0.0599962	0.0246748	0.00979829	0.00488722	0.013174	0.0353168	0.00318848	0.0125303
	0.163009	4.80987															377	0.0104563	0.0158776	0.0226783	0.0146895	0.0607121	0.0239636	0.0102929	0.00469198	0.0132423	0.0349101	0.00344114	0.0125067
	0.96502	3.50351															378	0.0104438	0.0155428	0.0236385	0.0155028	0.0605211	0.0238621	0.0106283	0.00451812	0.0132896	0.0344352	0.00366387	0.0127067
	0.592845	1.34															379	0.0105091	0.0155428	0.0233689	0.016342	0.0611515	0.0231453	0.0111864	0.00451812	0.0133446	0.0338968	0.0039333	0.0126618
	1.23565	5.89961															380	0.0104822	0.0152141	0.0242869	0.0170062	0.0608539	0.0228083	0.0115577	0.00436572	0.0133764	0.0333717	0.00416248	0.0128661
	1.92169	4.634															381	0.0105368	0.0148925	0.023948	0.0176914	0.0614014	0.0220797	0.0121738	0.00423476	0.0134187	0.0328232	0.00444491	0.0127923
	1.52685	1.18399															382	0.0104966	0.0145782	0.0248124	0.0185821	0.0610036	0.021999	0.0125757	0.00412538	0.0134363	0.032148	0.0046761	0.0130729
	0.49267	0.623929															383	0.0105414	0.0142693	0.0244038	0.0194917	0.0614729	0.0212729	0.0132433	0.00403189	0.0134666	0.0314288	0.00496799	0.0129771
	0.591653	2.29054															384	0.0104896	0.0139652	0.0252034	0.0204176	0.0609838	0.0204828	0.0136699	0.00396698	0.0134714	0.0306708	0.00519719	0.0131781
	1.01603	2.42387															385	0.0105256	0.013974	0.0247262	0.0210224	0.0613815	0.0202066	0.0143813	0.0039715	0.0134901	0.0306257	0.00549535	0.0131138
	2.52317	0.338025															386	0.010464	0.0136847	0.0254507	0.0219714	0.0608113	0.0197121	0.0148262	0.00392718	0.0134835	0.0298122	0.00571918	0.0133932
	11.4752	0.0666667															387	0.0104923	0.013404	0.0249076	0.0226967	0.0611451	0.0194316	0.0155726	0.00390475	0.013491	0.028862	0.00602085	0.0133223
	4.63215	0.0444444															388	0.0104228	0.0131054	0.0255474	0.0236457	0.0605052	0.0186801	0.0160292	0.00390286	0.0134747	0.0280661	0.00623654	0.0135425
	0.333333	0.94668															389	0.0104444	0.0128367	0.0249426	0.0246104	0.0607832	0.018359	0.0168007	0.00392524	0.0134712	0.0271997	0.00653943	0.0138792
	0.232714	2.54942															390	0.0103689	0.0125771	0.0254897	0.0255669	0.0600855	0.0179543	0.0172621	0.00396948	0.0134466	0.0265683	0.00674486	0.0137714
	0.212692	3.8675															391	0.0103849	0.0126154	0.0248289	0.0265261	0.0603161	0.0176437	0.0180482	0.00396913	0.0134324	0.0256721	0.00704713	0.0141297
	0.246645	4.66817															392	0.0103051	0.0123698	0.0252771	0.0274781	0.0595727	0.0169707	0.0185071	0.00403458	0.013401	0.024769	0.00724078	0.0139113
	0.908104	1.35355															393	0.0103166	0.012084	0.0245672	0.0281771	0.0597638	0.016673	0.0192966	0.00412357	0.0133759	0.023882	0.00754098	0.0142825
	0.273442	1.57118															394	0.0102342	0.0118502	0.024912	0.0289058	0.0589865	0.0163043	0.0197457	0.00423326	0.0133392	0.0230699	0.00772194	0.0141422
	0.939018	1.22256															395	0.0102419	0.0116246	0.0241612	0.0295291	0.0591456	0.0160199	0.0205273	0.00436449	0.0133034	0.0228843	0.00801899	0.0145276
	1.14089	0.308721															396	0.0101582	0.0117097	0.0244006	0.0304354	0.058346	0.0153937	0.0209592	0.00452311	0.0132627	0.021987	0.00818681	0.0142628
	2.07764	3.00049															397	0.0101628	0.0114685	0.0236175	0.0313176	0.0584797	0.0151281	0.0217212	0.00451442	0.0132161	0.0211	0.0084799	0.0146543
	0.204879	2.06061															398	0.0100788	0.0111962	0.0237515	0.0321714	0.057669	0.0148	0.0221287	0.00469088	0.0131725	0.0202272	0.00863459	0.014482
	2.04698	0.236225															399	0.0100808	0.0109927	0.0229456	0.0327633	0.057783	0.0145501	0.02286	0.0048855	0.0131152	0.0196841	0.00892314	0.014879
	1.38023	0.989636															400	0.00999748	0.0107958	0.0229764	0.0335579	0.0569721	0.0139852	0.023236	0.00510056	0.01307	0.0188543	0.00906506	0.0145726
	1.59669	1.01414															401	0.00999705	0.010605	0.0221569	0.0343129	0.0570713	0.013477	0.0239257	0.00533573	0.013002	0.0180463	0.00934863	0.0147653
	2.70726	0.378431															402	0.00991489	0.0107063	0.0220887	0.0350242	0.0562704	0.0132361	0.0242633	0.00557255	0.0129563	0.0172631	0.00947846	0.0146422
	1.19873	0.188562															403	0.00991214	0.010447	0.0212646	0.0357116	0.0563588	0.0130112	0.0249018	0.00584378	0.0128779	0.0164732	0.00975667	0.0149401
	0.113847	0.125708															404	0.00983141	0.0102404	0.0211035	0.0363111	0.0555779	0.0128217	0.0251947	0.00586425	0.0128325	0.0158939	0.00987535	0.0153224
	1.9194	0.0666667															405	0.00982624	0.0100656	0.0202834	0.0367185	0.0556588	0.0123711	0.0257729	0.00615649	0.012744	0.0153533	0.0101479	0.0149673
	1.49624	2.16301															406	0.00974699	0.00989535	0.0200369	0.0371497	0.0549075	0.0122129	0.0260152	0.00646661	0.0126998	0.0149994	0.0102565	0.0153348
	0.461132	7.5164															407	0.00973917	0.00972928	0.0192284	0.0374947	0.0549835	0.0120086	0.0265258	0.00679381	0.0126017	0.0143697	0.010523	0.0150939
	0.487475	13.5335															408	0.00966122	0.00975422	0.0189054	0.0379128	0.0542713	0.0118702	0.0267125	0.00709625	0.0125595	0.0138704	0.0106229	0.0154426
	2.09911	3.97947															409	0.0096504	0.00959144	0.0181153	0.0382758	0.0543447	0.0115184	0.0271492	0.00744993	0.0124525	0.0132753	0.0108829	0.0150659
	3.25712	3.15838															410	0.00957343	0.00940827	0.0177255	0.0385086	0.0536803	0.0114164	0.027276	0.00749659	0.0124131	0.0128307	0.0109755	0.0153918
	0.782248	0.859296															411	0.00955916	0.00925275	0.0169595	0.0387478	0.0537532	0.0112725	0.0276344	0.00787053	0.012298	0.0123072	0.0112285	0.0151332
	0.802773	0.425134															412	0.00948269	0.00910025	0.0165131	0.0389141	0.0531453	0.0111917	0.0276979	0.00825825	0.0122619	0.0118226	0.0113153	0.0154312
	11.4326	3.01548															413	0.00946447	0.00887455	0.0157761	0.0390074	0.0532198	0.0109559	0.0279752	0.00865334	0.0121398	0.0114629	0.0115608	0.0150447
	5.91657	0.552579															414	0.00938795	0.00897357	0.0152838	0.0390266	0.0526765	0.0109159	0.027973	0.00900169	0.0121076	0.0110491	0.0116433	0.0153128
	0.563632	3.96872															415	0.00936524	0.00882646	0.0145793	0.0389698	0.0527552	0.01084	0.0281681	0.00941913	0.0119797	0.0106759	0.0118806	0.015045
	1.63758	6.44441															416	0.00928802	0.00865903	0.0140519	0.0390159	0.0522841	0.0108221	0.028099	0.0094951	0.0119521	0.0106914	0.0119602	0.0152774
	2.24651	10.2987															417	0.00926028	0.00851702	0.0133825	0.0388764	0.0523701	0.0107196	0.0282122	0.00992851	0.0118198	0.0102898	0.0121887	0.0148944
	2.44709	3.86146															418	0.00918169	0.00831118	0.0128305	0.0386463	0.0519783	0.0107459	0.0280764	0.0103592	0.0117972	0.0100683	0.0122669	0.0148242
	0.334442	2.03975															419	0.00914841	0.00817744	0.0121983	0.0383319	0.0520754	0.0107459	0.0281098	0.0108075	0.011662	0.00982764	0.0124858	0.0148242
	1.98576	2.06028															420	0.00906777	0.00826482	0.011632	0.0379682	0.0517696	0.0108351	0.0279082	0.0111757	0.011645	0.00959487	0.012564	0.0147169
	3.71763	0.656858															421	0.00902845	0.00813123	0.011038	0.0375266	0.0518826	0.0109057	0.0278653	0.011631	0.0115085	0.00943036	0.0127725	0.0148272
	2.58839	1.82352															422	0.00894508	0.00791863	0.0104672	0.0370813	0.0516687	0.0110203	0.0276004	0.0117227	0.0114975	0.00947399	0.0128518	0.0144734
	2.41777	1.83607															423	0.00889928	0.00779382	0.00991212	0.0365196	0.0518036	0.0110791	0.0274861	0.0121874	0.0113614	0.00937531	0.0130492	0.0146366
	1.87082	1.42996															424	0.00881257	0.00767236	0.00934588	0.0359002	0.0516872	0.0112632	0.0271613	0.0126552	0.011357	0.00921668	0.0131306	0.0142975
	1.0239	0.862964															425	0.00875989	0.00774891	0.00883006	0.035215	0.0518508	0.0113997	0.0269816	0.0130178	0.011223	0.0091955	0.0133162	0.0143186
	1.30103	0.715616															426	0.00866929	0.00762838	0.00827692	0.0344767	0.051837	0.0116817	0.0266015	0.013483	0.0112254	0.00921251	0.0134004	0.014002
	1.00198	0.210819															427	0.00860942	0.00747415	0.00780041	0.0341367	0.0520374	0.0118633	0.0263634	0.0139237	0.0110952	0.0093071	0.0135736	0.01398
	2.8915	0.0702728															428	0.00851447	0.00733051	0.00726814	0.0334123	0.0521312	0.012079	0.0259334	0.0140655	0.0111049	0.00948262	0.0136611	0.013763
	4.57674	2.44214															429	0.00844715	0.00722523	0.00683097	0.0325589	0.0523773	0.0122763	0.025645	0.0145338	0.0109799	0.00958261	0.0138212	0.0136924
	4.49564	4.67923															430	0.0083475	0.00712492	0.00632658	0.0316696	0.0525837	0.0127297	0.0251712	0.0149992	0.0109972	0.00971785	0.0139124	0.0134238
	1.61368	4.88399															431	0.00827256	0.00718986	0.00592889	0.0307657	0.0528851	0.0129666	0.0248412	0.0153268	0.0108787	0.00987265	0.0140589	0.0133107
	0.887305	3.78023															432	0.00816798	0.00707642	0.00545863	0.02979	0.053209	0.0132715	0.0243307	0.0157463	0.0109036	0.00998333	0.0141539	0.0131286
	1.20943	4.52601															433	0.00808534	0.00699166	0.00510074	0.0288194	0.0535763	0.0135176	0.0239681	0.0161885	0.0107927	0.0102171	0.0142862	0.012968
	3.5667	2.59927															434	0.00797574	0.00685909	0.00467014	0.0281953	0.0540228	0.0141351	0.0234284	0.0163654	0.0108252	0.010461	0.0143847	0.0127549
	3.68829	1.48588															435	0.00788541	0.00678406	0.00435263	0.0272183	0.054467	0.0147979	0.0230429	0.0168066	0.0107227	0.0107468	0.0145025	0.0124113
	0.874476	3.40932															436	0.00777086	0.0067169	0.00396651	0.026242	0.0550415	0.0147575	0.0224818	0.0172385	0.0107624	0.0110272	0.0146042	0.0122035
	0.780896	2.16838															437	0.00767293	0.00678187	0.00369028	0.025684	0.0555738	0.0154971	0.0220832	0.0174637	0.0106685	0.0112781	0.0147069	0.012043
	0.641917	1.81756															438	0.00755365	0.006729	0.00335276	0.0246931	0.056282	0.0157672	0.0215089	0.0178673	0.010715	0.0116321	0.0148113	0.0117551
	0.401839	0.626602															439	0.00744833	0.00668594	0.00311903	0.0237978	0.0569139	0.0165762	0.0211071	0.0182583	0.0106298	0.0119916	0.0148985	0.0116274
	0.0666667	0.267591															440	0.00732467	0.00656995	0.0028336	0.0228257	0.0577617	0.0164843	0.020528	0.0184663	0.0106822	0.0123959	0.015005	0.011324
	0.0222222	0.453649															441	0.00721228	0.0065418	0.00264381	0.0218601	0.0585045	0.0173347	0.0201329	0.0188485	0.0106052	0.0127728	0.0150764	0.011222
	0.274874	0.388628															442	0.00708477	0.00655264	0.00241332	0.0209194	0.059498	0.0175932	0.0195573	0.0191739	0.0106624	0.013221	0.015184	0.0108637
	0.205471	2.93859															443	0.00696572	0.00662375	0.00226906	0.0200015	0.060363	0.0184842	0.0191787	0.0193426	0.0105926	0.0136909	0.0152394	0.0107931
	6.03369	1.76797															444	0.006835	0.00662839	0.00209576	0.0191094	0.0615081	0.0183336	0.0186151	0.0196706	0.0106534	0.014181	0.0153473	0.0104056
	3.75312	2.27296															445	0.00670982	0.00664728	0.0019986	0.0183791	0.0625056	0.0192428	0.0182626	0.0199797	0.0105897	0.0146279	0.0153865	0.0103584
	0.905038	3.47513															446	0.00657667	0.00655748	0.0018841	0.0174651	0.0638079	0.0194552	0.0177192	0.0202083	0.0106524	0.0151228	0.0154936	0.00994356
	0.426623	1.86598															447	0.00644602	0.0066452	0.00183536	0.0169272	0.0649477	0.0203684	0.0174022	0.0204576	0.0105932	0.0155468	0.0155167	0.0099252
	3.79805	0.95866															448	0.0063113	0.00673199	0.00178065	0.0164296	0.0664122	0.020157	0.0168869	0.0205372	0.0106562	0.0158845	0.0156219	0.0094682
	1.23908	0.934067															449	0.00617594	0.00679993	0.00178119	0.0156695	0.0677026	0.0210614	0.0166142	0.0207834	0.0105999	0.0164398	0.0156289	0.00946999
	1.08992	0.24037															450	0.00604061	0.00688635	0.00178658	0.0149059	0.0693332	0.0211943	0.0161349	0.0210063	0.0106614	0.0169389	0.0157312	0.00901516
	0.756866	0.569517															451	0.0059014	0.00699239	0.00183649	0.01437	0.0707809	0.0220634	0.015915	0.0212052	0.0106063	0.0174743	0.0157225	0.00904233
	4.72254	0.708257															452	0.00576648	0.00700408	0.00190158	0.0137138	0.0725799	0.0226292	0.0154791	0.0213968	0.0106645	0.0180512	0.0158208	0.008577
	8.31234	0.735739															453	0.00562439	0.00714338	0.002	0.0130077	0.0741893	0.0223384	0.0153199	0.0215696	0.0106088	0.0186542	0.0157969	0.00804976
	4.66519	1.38155															454	0.00549092	0.00726778	0.00212362	0.0123746	0.076157	0.0231247	0.0149343	0.021527	0.010662	0.0191805	0.0158903	0.00810764
	1.97235	0.937826															455	0.00534702	0.00743936	0.00226846	0.0118256	0.07793	0.0231089	0.0148429	0.0216481	0.0106043	0.0197791	0.0158519	0.00762671
	2.67705	0.674874															456	0.00521605	0.00763503	0.00244867	0.0113138	0.080064	0.0238112	0.0145141	0.021742	0.0106511	0.0203791	0.0159396	0.00770434
	0.343001	0.845772															457	0.00507149	0.00792524	0.00263654	0.010989	0.0819989	0.023486	0.0144968	0.0217742	0.0105901	0.0208974	0.0158877	0.00715691
	0.11967	1.00552															458	0.00494405	0.00793145	0.00287057	0.0106928	0.0842936	0.0241212	0.0142307	0.0219859	0.0106291	0.0212065	0.0159689	0.00724512
	0.345697	0.564616															459	0.00480007	0.00819133	0.00309674	0.0102104	0.0863851	0.0239924	0.0142927	0.022018	0.010564	0.0217258	0.0159046	0.00677776
	0.270768	0.38873															460	0.00467715	0.00837677	0.00338102	0.00999134	0.088831	0.0245212	0.0140944	0.0218537	0.0105943	0.0222183	0.0159789	0.0068822
	0.575624	0.594281															461	0.00453504	0.00874704	0.0036395	0.00954238	0.0910693	0.0241818	0.0142399	0.0218065	0.0105246	0.0228546	0.0159036	0.00633856
	0.898466	0.0666667															462	0.00441757	0.00907584	0.00396974	0.00921446	0.0936527	0.0246315	0.0141136	0.0217594	0.0105455	0.0234283	0.0159706	0.00645022
	0.965114	0.0666667															463	0.00427867	0.00943329	0.00425351	0.00905784	0.0960232	0.0243988	0.0143453	0.0216834	0.0104708	0.0238722	0.015886	0.00602152
	0.408013	0.7898															464	0.00416751	0.0095089	0.00462474	0.00871626	0.0987255	0.0247326	0.0142945	0.0218475	0.0104821	0.0243658	0.0159455	0.00614631
	0.474245	1.91324															465	0.00403321	0.00991109	0.00492606	0.00847786	0.101208	0.0243996	0.0146136	0.0217302	0.0104027	0.0248994	0.0158532	0.00563195
	10.3997	1.32502															466	0.00392914	0.0102358	0.00533279	0.00826901	0.104006	0.0246508	0.0146405	0.0214453	0.0104042	0.0254173	0.0159053	0.00576102
	6.85787	0.246024															467	0.00380083	0.0106815	0.00564357	0.00808863	0.106576	0.0244968	0.0150465	0.021284	0.0103206	0.0259177	0.0158071	0.00540318
	2.86613	2.62381															468	0.00370455	0.0111569	0.00607992	0.00777403	0.10944	0.0241641	0.0151523	0.0210955	0.0103126	0.0264445	0.0158519	0.0050775
	0.681091	1.40469															469	0.00358363	0.0116617	0.00639215	0.00781514	0.112066	0.0242764	0.0156429	0.0208806	0.0102254	0.0265168	0.0157497	0.00507808
	1.82878	2.58258															470	0.00349576	0.0118201	0.006852	0.00770312	0.114963	0.0239314	0.0158275	0.0209755	0.0102085	0.026968	0.0157875	0.00479691
	1.44661	2.63792															471	0.00338358	0.0123977	0.00715811	0.00761588	0.11761	0.0239157	0.0163985	0.0207148	0.0101185	0.0273968	0.0156829	0.0049395
	0.663226	0.545229															472	0.0033047	0.0127581	0.00763527	0.00755232	0.120501	0.0235377	0.0166605	0.0203757	0.0100933	0.0278017	0.0157141	0.00471619
	3.0655	0.246024															473	0.00320258	0.0133482	0.00792845	0.00742347	0.123129	0.0235549	0.0173059	0.0200882	0.0100016	0.0281672	0.0156086	0.00470304
	0.401384	0.569234															474	0.0031332	0.0139645	0.00841677	0.00755794	0.125973	0.0231746	0.0176426	0.0197792	0.00996889	0.0283343	0.0156336	0.00453549
	1.7266	3.00787															475	0.00304237	0.014606	0.00869121	0.00747675	0.128537	0.0229998	0.0183543	0.0194504	0.00987644	0.028761	0.0155286	0.00468525
	2.83018	3.1481															476	0.00298299	0.0148338	0.00918472	0.00748724	0.131288	0.0226024	0.0187619	0.0194712	0.00983722	0.0290673	0.0155476	0.00458568
	1.4383	1.2347															477	0.00290458	0.0152708	0.00943575	0.0074256	0.133743	0.0223522	0.0195302	0.0191034	0.00974503	0.029347	0.0154442	0.00474175
	7.94324	1.45569															478	0.00285569	0.015957	0.00992872	0.00747234	0.136355	0.0221422	0.0200036	0.0187401	0.00970033	0.0295995	0.0154574	0.00452133
	3.70291	0.993308															479	0.00279069	0.0166624	0.0101528	0.00753579	0.138653	0.0218397	0.0208171	0.0183625	0.00960936	0.0297039	0.0153563	0.00467597
	1.57866	6.08876															480	0.0027528	0.0173847	0.0106398	0.00770067	0.141079	0.0214457	0.0213502	0.0179724	0.00956031	0.0297415	0.0153639	0.00471607
	4.03518	1.90188															481	0.00270207	0.0180473	0.0108346	0.0077894	0.143174	0.0210875	0.0221965	0.0175802	0.00947142	0.0299197	0.0152654	0.00487616
	1.46153	1.75774															482	0.00267573	0.0183546	0.0113106	0.00774219	0.145368	0.0209201	0.0227823	0.0175278	0.00941919	0.0301856	0.0152671	0.0047792
	0.488588	0.534341															483	0.00263993	0.018869	0.0114746	0.00786177	0.147215	0.0205223	0.0236476	0.0171633	0.00933314	0.0303057	0.0151712	0.0049375
	0.368917	0.579298															484	0.00262574	0.0196253	0.0119347	0.00799465	0.149135	0.0199428	0.0242784	0.0167485	0.00927895	0.0303939	0.0151667	0.00506117
	1.02203	1.52105															485	0.00260534	0.0203869	0.0120676	0.00813999	0.150692	0.0195865	0.0251489	0.0163295	0.00919641	0.0304502	0.015073	0.0053205
	0.60451	0.348993															486	0.00260398	0.0210156	0.0125074	0.00836324	0.1523	0.0193528	0.0258165	0.0159168	0.00914149	0.0303242	0.0150616	0.00524759
	1.40845	7.19312															487	0.00259924	0.0217632	0.0126093	0.00840567	0.153532	0.0190138	0.0266777	0.0154952	0.009063	0.030376	0.0149694	0.00557692
	1.0158	1.49213															488	0.00261147	0.0221196	0.0130247	0.00857476	0.154794	0.018527	0.0273735	0.015392	0.00900863	0.0303502	0.0149503	0.00573741
	0.974005	0.293768															489	0.00262246	0.0226714	0.0130964	0.0087534	0.15567	0.0182081	0.0282116	0.015069	0.00893462	0.030294	0.0148585	0.00614111
	0.378266	0.433999															490	0.00264909	0.0234223	0.0134836	0.00888197	0.156562	0.0179285	0.028927	0.0146541	0.00888211	0.0303503	0.0148307	0.00605297
	0.0801234	3.77967															491	0.00267566	0.0239699	0.0135262	0.00898887	0.157059	0.0176293	0.0297284	0.0142487	0.00881293	0.0302942	0.0147378	0.00652107
	0.382378	5.45511															492	0.00271759	0.0246837	0.0138816	0.00923999	0.157561	0.0171126	0.0304546	0.0138455	0.00876361	0.0300561	0.0147001	0.00668712
	0.351945	1.28524															493	0.0027594	0.025382	0.0138968	0.00944877	0.157664	0.0168394	0.0312069	0.0134514	0.00869952	0.0299083	0.0146046	0.00722156
	0.884789	1.3714															494	0.00281755	0.0257515	0.0142171	0.00966361	0.157766	0.0165242	0.0319354	0.0133241	0.00865479	0.0297332	0.0145558	0.00712148
	0.359409	2.42018															495	0.00287412	0.0262915	0.0142065	0.00988372	0.157467	0.0162722	0.0326271	0.0130702	0.00859598	0.0295318	0.014456	0.00771078
	5.02177	0.721312															496	0.00294942	0.0267225	0.0144886	0.0100232	0.157165	0.0157456	0.0333495	0.0126966	0.00855727	0.0293558	0.0143947	0.00788533
	4.13191	0.492241															497	0.00302011	0.0273604	0.0144541	0.0102279	0.156466	0.0155236	0.0339709	0.0123388	0.0085039	0.0291867	0.0142889	0.00852951
	3.04895	0.653649															498	0.00311351	0.0279741	0.0146953	0.0104891	0.155764	0.0151822	0.0346791	0.0119957	0.00847269	0.0288606	0.0142138	0.00842221
	2.06848	0.281091															499	0.00319757	0.0285624	0.0146388	0.0107237	0.154672	0.0149824	0.0352215	0.0116685	0.00842489	0.0285754	0.0141003	0.00910892
	2.86092	0.142538															500	0.00330995	0.0285624	0.0148367	0.0107904	0.153583	0.0144623	0.0359078	0.0116685	0.00840275	0.0284939	0.0140101	0.00929624
	0.637455	0.370184															501	0.00353871	0.0291238	0.0149127	0.0110976	0.150652	0.0139362	0.0370213	0.0113583	0.00834924	0.028127	0.0137812	0.00991587
	0.120316	0.564938															502	0.00364703	0.0296574	0.014818	0.0113359	0.148825	0.013792	0.0373872	0.011066	0.00831312	0.0277854	0.0136479	0.0106725
	0.350113	0.364483															503	0.00379963	0.0301625	0.0149234	0.0115845	0.147018	0.013427	0.0380074	0.0107923	0.00831407	0.0274271	0.0135249	0.0105665
	0.756532	0.561027															504	0.00391877	0.0306388	0.0148126	0.0118097	0.14486	0.0133055	0.0382788	0.0105381	0.00828418	0.0271335	0.0133799	0.0113449
	0.769846	0.36241															505	0.00409234	0.0308024	0.0148697	0.0119772	0.142734	0.0128133	0.0388557	0.0102795	0.00829936	0.0267996	0.0132396	0.01156
	0.573561	4.9021															506	0.00422145	0.0312062	0.0147445	0.0122114	0.140276	0.0127269	0.0390305	0.010193	0.00827612	0.0264047	0.0130823	0.0123581
	4.05769	3.51866															507	0.00441634	0.0315037	0.0147525	0.0124418	0.137864	0.0123562	0.0395578	0.0100902	0.00830745	0.0259977	0.0129247	0.0122631
	2.73179	3.93766															508	0.00455459	0.0318927	0.0146148	0.0126674	0.13514	0.012293	0.0396353	0.00989743	0.00829146	0.0255803	0.0127547	0.0130694
	3.58964	2.56638															509	0.00477089	0.0322533	0.0145737	0.0128844	0.132476	0.0118364	0.0401071	0.00972599	0.00834101	0.0252159	0.0125799	0.0133139
	3.80644	2.73007															510	0.00491751	0.0322989	0.0144252	0.0130466	0.129524	0.0118092	0.040088	0.00953874	0.00833311	0.0248307	0.0123974	0.0141263
	2.27296	13.3563															511	0.00515512	0.0326055	0.0143356	0.013268	0.126647	0.0114409	0.0404989	0.00940724	0.00840309	0.0246284	0.0122063	0.014052
	2.19626	0.499206															512	0.00530938	0.0329319	0.0141779	0.0134736	0.123506	0.0114373	0.0403853	0.00940768	0.00840438	0.0241874	0.0120119	0.0148605
	1.61734	0.289248															513	0.00556789	0.0331703	0.0140409	0.0136702	0.120455	0.0110254	0.0407305	0.00934147	0.00849719	0.0237422	0.0118056	0.0151423
	1.17018	0.272942															514	0.00572913	0.0334239	0.0138759	0.0137186	0.117164	0.0110583	0.0405255	0.00925694	0.00850912	0.0233379	0.0116003	0.015945
	0.459216	0.223252															515	0.00600787	0.0333744	0.0136935	0.0138882	0.113979	0.0107007	0.040801	0.00914353	0.00862733	0.0229969	0.0113803	0.0159015
	1.37578	0.452449															516	0.00617547	0.0335837	0.0135226	0.0140572	0.110581	0.0107576	0.0405086	0.00909919	0.00865174	0.0225526	0.0111656	0.01669
	0.624423	0.311111															517	0.00647348	0.0337711	0.0132977	0.0142144	0.107303	0.0104898	0.0407113	0.00907641	0.00879811	0.0221094	0.0109338	0.0174361
	0.248484	1.62878															518	0.00664684	0.0340232	0.0131226	0.0143589	0.103836	0.0101541	0.0403367	0.00915752	0.00883722	0.0216685	0.0107116	0.0177869
	0.892034	0.459216															519	0.00696286	0.0342039	0.0128587	0.0145182	0.100506	0.0102575	0.0404644	0.00913574	0.0090147	0.021284	0.0104701	0.0181821
	1.41981	0.297448															520	0.0071414	0.0340844	0.012681	0.0146452	0.0970106	0.00994728	0.0400134	0.00909484	0.00907115	0.0208457	0.0102425	0.018559
	0.4	0.0222222															521	0.00747386	0.0342125	0.0123825	0.0147429	0.093667	0.0100893	0.0400649	0.00913555	0.00928282	0.0205604	0.00999389	0.019284
	0.424178	1.8596															522	0.00765696	0.0343227	0.0122039	0.0148508	0.0901817	0.00981814	0.0395441	0.00919677	0.00935962	0.0202664	0.00976315	0.0196895
	0.393707	0.231181															523	0.00800401	0.0344163	0.0118759	0.014932	0.086863	0.00994762	0.0395195	0.00927826	0.00960861	0.0198467	0.00950998	0.0200292
	0.417165	0.155556															524	0.00819099	0.0346017	0.0116983	0.0150177	0.0834235	0.0097059	0.0389359	0.00943139	0.00970902	0.019438	0.00927865	0.0204633
	0.739708	0.567177															525	0.00855052	0.0344939	0.0113465	0.0150726	0.0801658	0.00990819	0.0388366	0.0093795	0.00999842	0.0190326	0.00902351	0.0211301
	0.838696	0.750276															526	0.0087406	0.0345567	0.0111719	0.0151634	0.0768057	0.00970809	0.0381976	0.00950018	0.0101258	0.0186584	0.00879412	0.0215928
	0.34511	2.05486															527	0.00911021	0.0346053	0.0108029	0.0150843	0.0736425	0.0099446	0.0380261	0.00963973	0.0104584	0.0184474	0.00853958	0.0222255
	1.03432	2.56272															528	0.00930245	0.0346406	0.0106334	0.0151365	0.0703925	0.00969913	0.0373395	0.00979777	0.0106161	0.018067	0.00831461	0.0223631
	0.722257	0.359409															529	0.00967952	0.0347782	0.0102542	0.0151348	0.0673542	0.0099599	0.0370995	0.0100013	0.0109943	0.0177029	0.00806311	0.0229614
	0.0496904	0.318323															530	0.00987278	0.0345786	0.0100923	0.0151152	0.0642415	0.00983598	0.0363731	0.0100992	0.011185	0.0173512	0.0078449	0.0234798
	9.5208	0.133333															531	0.0102545	0.0346737	0.00971028	0.0150775	0.0613553	0.0101285	0.0360695	0.010167	0.0116104	0.0170126	0.00759869	0.0240382
	3.8442	0.0666667															532	0.0104474	0.0346726	0.00955898	0.0150237	0.0584037	0.00993751	0.0353112	0.010377	0.0118363	0.0169132	0.00738934	0.0242404
	3.58797	4.3663															533	0.0108306	0.0346607	0.00918173	0.0150874	0.0556928	0.0102533	0.0349499	0.0106032	0.0123095	0.0165813	0.00715041	0.0247614
	2.75668	0.668506															534	0.0110215	0.034638	0.00904426	0.015005	0.0529222	0.0104319	0.0341672	0.0108449	0.0125715	0.0162703	0.00695177	0.0254789
	2.69382	0.640501															535	0.0114032	0.03454	0.00867956	0.014905	0.050406	0.0104247	0.0337548	0.0110002	0.0130919	0.0159732	0.00672182	0.0260711
	2.89989	2.28152															536	0.01159	0.0345044	0.00855953	0.0147882	0.0478324	0.0106656	0.0329552	0.0112631	0.0133895	0.01569	0.00653542	0.0261899
	5.99337	1.01851															537	0.0119668	0.0345621	0.00821507	0.014745	0.045526	0.0106966	0.0324991	0.0113722	0.0139548	0.0153917	0.00631584	0.0268048
	3.89359	0.0993808															538	0.0121473	0.0345093	0.00811639	0.0146017	0.0431614	0.011083	0.0316896	0.0116563	0.0142861	0.0153023	0.00614287	0.0272
	1.04015	0.897658															539	0.0125157	0.0344466	0.00779963	0.0144446	0.0410758	0.0111545	0.0311975	0.0119529	0.0148923	0.0150562	0.00593471	0.0278237
	1.80733	3.32822															540	0.0126872	0.0342291	0.00772639	0.0143239	0.0389284	0.0114313	0.0303847	0.0121502	0.0152533	0.0148418	0.00577603	0.0278827
	0.407233	1.87337															541	0.0130437	0.0342639	0.00744434	0.0141464	0.0370708	0.0115398	0.0298646	0.0124435	0.0158949	0.0146221	0.00558007	0.028522
	1.89265	2.12768															542	0.0132031	0.0341794	0.00740056	0.0140643	0.0351451	0.0119646	0.0290549	0.0127667	0.0162799	0.0143776	0.00543618	0.0288221
	1.13482	0.572661															543	0.0135442	0.0341999	0.00715963	0.0138624	0.0335186	0.0121078	0.0285147	0.0129103	0.0169498	0.0141657	0.00525292	0.0294582
	0.605801	1.32719															544	0.0136882	0.0339813	0.00714906	0.0136582	0.0318158	0.0124198	0.0277139	0.0131314	0.0173515	0.0141311	0.00512405	0.0294621
	0.223802	0.181384															545	0.0140104	0.0338789	0.00695481	0.0134397	0.0304199	0.0125964	0.0271616	0.0134763	0.0180412	0.01395	0.00495373	0.0301052
	0.244444	0.16178															546	0.0141352	0.0337662	0.00698061	0.0132129	0.028938	0.013047	0.026375	0.0138285	0.018451	0.0137799	0.00483981	0.0303024
	1.17892	0.342716															547	0.0144349	0.0337402	0.0068376	0.0130957	0.0277694	0.0132496	0.0258185	0.0141445	0.019151	0.013578	0.00468248	0.0309285
	0.989369	0.0222222															548	0.0145367	0.0336035	0.00690203	0.0129179	0.0265036	0.0135938	0.0250511	0.0145049	0.0195596	0.0134188	0.00458322	0.0308829
	0.360434	1.47367															549	0.0148104	0.0335084	0.00681366	0.0126727	0.0255561	0.0141815	0.0244979	0.0145505	0.02026	0.013277	0.00443876	0.0314378
	4.64266	2.47069															550	0.0148852	0.0333623	0.00691778	0.0124319	0.0244993	0.0142839	0.0237544	0.0149179	0.0206574	0.0132772	0.00435367	0.0315933
	6.02019	1.97201															551	0.0151295	0.0332042	0.00688616	0.0122973	0.0237645	0.0148983	0.0232117	0.0152881	0.0213483	0.0131043	0.00422186	0.0320964
	3.75828	0.149071															552	0.0151734	0.0330334	0.00702967	0.0120436	0.0229076	0.0151615	0.0224966	0.0156597	0.0217251	0.0129818	0.00415027	0.0326759
	0.749265	2.89754															553	0.015385	0.0329355	0.00705552	0.0117735	0.0223752	0.0155409	0.0219714	0.0159757	0.0223969	0.012826	0.00403079	0.0325674
	2.92594	3.51957															554	0.0153942	0.0327107	0.00723655	0.0115824	0.0217077	0.0158182	0.0212889	0.0162197	0.0227444	0.0127631	0.00397195	0.0331298
	4.7218	0.443882															555	0.0155701	0.0326516	0.00731926	0.011383	0.0213661	0.0162635	0.020788	0.0164017	0.0233883	0.0126491	0.00386442	0.0330563
	0.998296	0.487459															556	0.0155412	0.0324392	0.00753444	0.0112503	0.0208762	0.0165368	0.0201422	0.0167694	0.0236991	0.012619	0.00381747	0.0335693
	0.202736	0.633008															557	0.0156787	0.0322116	0.00767206	0.0110007	0.0207129	0.0169259	0.0196722	0.0171329	0.0243077	0.0125219	0.0037215	0.0334274
	1.02284	0.51967															558	0.0156087	0.0320453	0.0079166	0.0107545	0.0203879	0.017203	0.019067	0.0174285	0.0245759	0.0124288	0.00368553	0.0339149
	0.171973	1.1065															559	0.0157054	0.0318138	0.00810602	0.0105127	0.0203898	0.0176079	0.0186345	0.0176578	0.0251431	0.0123391	0.00360071	0.0337235
	0.171973	0.484776															560	0.0155922	0.0315491	0.008374	0.0103774	0.0202165	0.0178677	0.0180738	0.0180006	0.0253646	0.0122168	0.0035748	0.0341517
	0.160802	0.415373															561	0.0156463	0.0314304	0.00861111	0.0101427	0.0203703	0.0182518	0.0176853	0.0181826	0.0258858	0.012134	0.00350072	0.0339834
	0.355556	0.141893															562	0.0154885	0.0311349	0.00889578	0.00995395	0.0203353	0.0185046	0.0171728	0.0185137	0.0260584	0.0121188	0.00348392	0.034379
	0.63115	0.378631															563	0.0154989	0.0308207	0.00917572	0.0097287	0.0206278	0.0188475	0.0168346	0.0188326	0.0265306	0.0120334	0.0034202	0.034073
	3.09104	0.409413															564	0.0152964	0.030647	0.00946992	0.00948979	0.0207175	0.0190717	0.0163741	0.0189637	0.0266536	0.0119286	0.00341158	0.0344033
	2.41768	0.320493															565	0.0152625	0.0303081	0.00978731	0.00936517	0.0211356	0.0194339	0.0160928	0.0192575	0.0270751	0.0118219	0.00335787	0.0342154
	1.40851	0.0888889															566	0.015016	0.029949	0.0100839	0.00915742	0.0213366	0.019987	0.0156877	0.0195349	0.0271494	0.0117447	0.00335652	0.0343142
	2.76396	0.513384															567	0.0149382	0.0297595	0.010433	0.00903687	0.0218677	0.0201749	0.0154696	0.0197	0.02752	0.0117858	0.00331248	0.0345695
	13.6283	0.575113															568	0.01465	0.0293646	0.0107251	0.00884245	0.0221669	0.0203983	0.015123	0.019954	0.0275477	0.0117033	0.00331754	0.0341231
	2.66859	0.803439															569	0.0145294	0.0291079	0.0111004	0.00868528	0.022799	0.0206629	0.0149743	0.0200979	0.0278681	0.0116051	0.00328285	0.0345848
	0.588242	0.733333															570	0.0142027	0.0287463	0.0113817	0.0085749	0.0231836	0.0208447	0.0146889	0.0202537	0.0278522	0.011504	0.00329348	0.034107
	0.577961	0.872184															571	0.0140413	0.0283024	0.0117775	0.00839755	0.0239051	0.0209668	0.0146157	0.0204506	0.0281239	0.0114208	0.00326788	0.0342561
	0.238252	0.485823															572	0.0136805	0.0278366	0.0120426	0.00822754	0.0243628	0.0210893	0.0143934	0.0206238	0.028068	0.0113359	0.00328329	0.0337249
	0.280186	1.47424															573	0.013481	0.0275688	0.0124536	0.00805291	0.0251629	0.0213303	0.0144012	0.0207541	0.0282934	0.0112849	0.00326651	0.0341591
	0.23217	1.82923															574	0.0130916	0.0272934	0.0126981	0.00793767	0.0256818	0.0214073	0.0142431	0.02083	0.0282014	0.0112062	0.00328597	0.0336041
	0.356348	0.6705															575	0.0128575	0.0267851	0.0131193	0.00778411	0.0265502	0.0214581	0.0143368	0.0209505	0.028383	0.0111194	0.00327777	0.0336525
	0.975343	0.2															576	0.0124459	0.0263086	0.0133399	0.0076371	0.027119	0.0214763	0.0142429	0.0209905	0.0282592	0.0110302	0.00330059	0.0330572
	2.03849	0.0222222															577	0.0121813	0.0257565	0.0137666	0.00752023	0.0280461	0.0214863	0.0144262	0.0210586	0.0284	0.0109225	0.00330074	0.0330504
	0.279917																578	0.0117541	0.0251839	0.0139607	0.00738487	0.0286539	0.0216551	0.0143952	0.0210986	0.0282485	0.0108281	0.00332627	0.0328463
	0.230781																579	0.0114639	0.0251319	0.0143889	0.00728096	0.0296307	0.0216359	0.0146707	0.0211466	0.0283514	0.0107518	0.00333457	0.0328047
	0.413366																580	0.0110283	0.02454	0.0145549	0.00722117	0.0302671	0.0215542	0.0146997	0.0211549	0.0281763	0.0107009	0.00336222	0.0321686
	0.480033																581	0.0107175	0.0239798	0.0149807	0.00709527	0.0312847	0.0215945	0.0150683	0.0210924	0.0282444	0.0105962	0.00337846	0.0318854
	0.249247																582	0.0102805	0.0233502	0.015118	0.00697384	0.0319397	0.0215945	0.0151531	0.0210459	0.0280493	0.0104887	0.00340767	0.0318854
	0.151799																583	0.00995474	0.0230403	0.015538	0.00689183	0.0329901	0.0215707	0.0156138	0.0209657	0.0280857	0.0103865	0.00343165	0.0315764
	7.749																584	0.00952324	0.0223911	0.0156467	0.00679813	0.0336541	0.0214615	0.0157483	0.0208708	0.0278742	0.0102576	0.00346191	0.0314272
	6.39885																585	0.00918815	0.0219923	0.0160578	0.00665653	0.0347291	0.0212537	0.0162984	0.0208964	0.0278817	0.0102265	0.00349341	0.0307766
	5.61516																586	0.00876846	0.0213167	0.0161385	0.00654698	0.0353929	0.0213497	0.016475	0.0207599	0.0276569	0.0101118	0.00352425	0.0310643
	4.0429																587	0.00842987	0.0206783	0.016538	0.00644003	0.0364847	0.0211069	0.0171097	0.0205757	0.0276383	0.00999409	0.00356305	0.0304183
	0.288889																588	0.00802755	0.0203592	0.0165921	0.00636087	0.0371393	0.0209488	0.0173193	0.0204197	0.0274031	0.00988916	0.00359403	0.0302097
	0.355556																589	0.00769129	0.0196593	0.0169774	0.00625577	0.0382402	0.0206766	0.0180317	0.0202164	0.0273609	0.00976677	0.00363991	0.0295724
	0.926779																590	0.00731108	0.0189511	0.0170064	0.00615214	0.0388767	0.0207252	0.0182644	0.0199882	0.0271177	0.00964119	0.00367061	0.0298056
	0.795821																591	0.00698285	0.0185072	0.0173755	0.0060466	0.0399788	0.0204259	0.019046	0.0199458	0.0270544	0.00950024	0.0037233	0.0291796
	1.48846																592	0.00662854	0.0177876	0.0173815	0.00594471	0.0405885	0.0202321	0.0192908	0.0196803	0.0268055	0.0093684	0.00375332	0.0289236
	1.28477																593	0.00631387	0.0175178	0.0177322	0.0058617	0.0416837	0.0199153	0.0201318	0.0194619	0.0267231	0.00925506	0.00381256	0.0283173
	0.0496904																594	0.00598829	0.0167966	0.0177175	0.00580536	0.042258	0.0199181	0.0203773	0.0191663	0.0264705	0.00914257	0.00384151	0.0284909
	0.290942																595	0.00569244	0.0160751	0.0180482	0.00571022	0.0433381	0.0195826	0.0212666	0.0188509	0.0263709	0.0091128	0.00390698	0.027901
	0.766374																596	0.00539752	0.0153555	0.0180154	0.00557807	0.0438682	0.0193659	0.0215019	0.0185171	0.0261164	0.00897937	0.00393448	0.0276068
	1.46404																597	0.00512538	0.0149008	0.0183245	0.00548855	0.0449243	0.0190244	0.0224278	0.0184081	0.0260014	0.00886061	0.00400583	0.027045
	0.489506																598	0.00486224	0.0145856	0.0182761	0.0054103	0.0454014	0.0188098	0.0226421	0.0181293	0.0257463	0.00869801	0.00403151	0.0270251
	0.0888889																599	0.00461831	0.0139299	0.0185625	0.00530411	0.0464245	0.0186316	0.0235926	0.0178002	0.0256175	0.00855143	0.00410833	0.0266116
	13.9267																600	0.00438734	0.0132279	0.0185012	0.00519692	0.0468395	0.0182112	0.0237762	0.01742	0.025363	0.00840268	0.00413179	0.0261641
	7.08621																601	0.00417568	0.0125358	0.0187637	0.00508859	0.0478197	0.0179756	0.0247393	0.0170274	0.0252218	0.00825194	0.00421363	0.0258168
	4.18299																602	0.00397672	0.0118553	0.0186925	0.00496127	0.0481634	0.0176235	0.0248833	0.0166237	0.024969	0.00813643	0.00423445	0.0253291
	0.354036																603	0.00380089	0.0115575	0.0189303	0.00485012	0.0490902	0.0175255	0.0258471	0.0163109	0.0248165	0.00798353	0.0043208	0.0253326
	2.0402																604	0.00363332	0.0111296	0.0188518	0.00473794	0.0493531	0.0171727	0.0259443	0.0161349	0.0245662	0.00782916	0.00433854	0.0248659
	0.239926																605	0.00349639	0.0105362	0.0190645	0.00462479	0.0502156	0.0169397	0.0268975	0.015789	0.0244036	0.00767354	0.00442879	0.0244907
	0.198762																606	0.00335928	0.00990083	0.0189815	0.00457186	0.0503879	0.0166022	0.0269418	0.0153607	0.0241564	0.00765701	0.00444297	0.0240608
	0.239926																607	0.00326378	0.00928354	0.0191688	0.00448567	0.0511744	0.0164715	0.0278736	0.014927	0.0239846	0.00750012	0.00453643	0.0239897
	0.239926																608	0.00315603	0.00900401	0.019084	0.00434241	0.0512462	0.0161389	0.0278605	0.0145971	0.0237409	0.00735908	0.00454652	0.0235805
	4.17529																609	0.00310396	0.00841119	0.0192459	0.00422617	0.0519446	0.0159161	0.0287605	0.0141571	0.0235607	0.00720055	0.00464243	0.0231792
	1.69322																610	0.00302439	0.00810834	0.019162	0.00410994	0.0519058	0.0156046	0.0286868	0.0140484	0.023321	0.00704173	0.00464784	0.022807
	2.53019																611	0.00301716	0.00755273	0.0192988	0.00400156	0.0525035	0.0154462	0.0295455	0.0136061	0.0231329	0.00690571	0.00474532	0.0226595
	1.39386																612	0.00296463	0.00701977	0.0192182	0.00388613	0.0523444	0.0151441	0.0294096	0.0131634	0.0228973	0.00674631	0.00474541	0.0223067
	0.0924951																613	0.00300309	0.0067616	0.0193306	0.00380097	0.0528287	0.0146833	0.0302179	0.0128302	0.0227021	0.00657669	0.00484347	0.0217868
	0.410232																614	0.00297656	0.00625788	0.0192557	0.00366456	0.0525399	0.0146608	0.0300195	0.0123897	0.0224706	0.00644413	0.00483753	0.021564
	0.547117																615	0.00306099	0.00577856	0.0193448	0.00355453	0.0528985	0.0142253	0.0307693	0.0119521	0.0222686	0.00628939	0.00493507	0.0212467
	1.0899																616	0.00305957	0.00556473	0.0192777	0.00347433	0.0524713	0.0142163	0.0305091	0.0118453	0.0220413	0.00627913	0.00492233	0.0210414
	0.584738																617	0.00318964	0.00512977	0.0193448	0.00336912	0.0526928	0.0137777	0.0311933	0.0114131	0.021833	0.00612396	0.00501815	0.0204986
	0.282405																618	0.00321266	0.00489547	0.0192876	0.00326783	0.05212	0.0135975	0.0308733	0.0110905	0.0216096	0.00597047	0.0049978	0.020032
	0.882249																619	0.00338744	0.00449263	0.0193344	0.00317114	0.0521943	0.0133478	0.0314857	0.0106688	0.0213953	0.00581904	0.0050906	0.0199358
	1.34075																620	0.00343445	0.00411607	0.0192889	0.00309852	0.0514705	0.0131741	0.031109	0.0102547	0.0211757	0.00569538	0.00506175	0.0194524
	1.2499																621	0.00365242	0.00376599	0.0193176	0.00301047	0.0513899	0.0129724	0.0316446	0.00984915	0.0209557	0.00554915	0.00515015	0.019218
	0.367864																622	0.00372321	0.00376599	0.0192854	0.00292907	0.0505126	0.0128184	0.0312152	0.00984915	0.0207396	0.00540608	0.00511194	0.018737
	0.360146																623	0.00398224	0.00344257	0.0192982	0.00285507	0.0502725	0.0125811	0.0316706	0.00945331	0.0205142	0.00526657	0.00519451	0.0186353
	0.278648																624	0.00407682	0.00314584	0.0192808	0.00278925	0.0492427	0.0124354	0.0311932	0.00906817	0.0203014	0.00513104	0.00514607	0.0181418
	0.415738																625	0.00437419	0.0028758	0.0192806	0.00271926	0.0488427	0.0122844	0.0315662	0.00869467	0.020071	0.00503755	0.00522138	0.0179513
	0.219051																626	0.0044928	0.00263237	0.0192791	0.00267221	0.0476657	0.0121588	0.0310465	0.00833369	0.0198612	0.00490916	0.0051619	0.0174646
	0.808559																627	0.0048252	0.00245201	0.0192687	0.00264514	0.0471105	0.0120392	0.0313366	0.00807484	0.0196263	0.00488007	0.00522857	0.0173028
	0.270786																628	0.00496823	0.0024154	0.0192841	0.00261369	0.0457968	0.0118252	0.0307805	0.00798606	0.0194192	0.00475848	0.00515737	0.0168619
	0.141893																629	0.00533182	0.00222468	0.0192668	0.00259368	0.0450972	0.0117277	0.0309888	0.00765252	0.0191804	0.00464249	0.00521412	0.0167119
	0.111111																630	0.00549976	0.00205995	0.0192999	0.00258442	0.043663	0.0114405	0.0304027	0.00733374	0.0189761	0.00453434	0.00513069	0.0161132
	0.279917																631	0.00589021	0.00192092	0.019279	0.00257701	0.0428361	0.0115659	0.0305319	0.00703028	0.018734	0.00445382	0.00517644	0.0161078
	0.383577																632	0.00608362	0.00176935	0.0193303	0.00259469	0.0413039	0.0111807	0.0299221	0.00682109	0.0185325	0.00435396	0.00508051	0.0155107
	0.267775																633	0.00649613	0.00169801	0.0193092	0.00262607	0.0403737	0.0113137	0.0299763	0.00665645	0.0182881	0.00426123	0.00511446	0.0155205
	0.201579																634	0.00671554	0.00171848	0.0193791	0.00265836	0.0387716	0.0110908	0.0293493	0.00647115	0.0180897	0.00415697	0.00500606	0.0149334
	0.851242																635	0.00714496	0.00165428	0.0193611	0.00270585	0.0377687	0.0110373	0.0293338	0.00621615	0.0178441	0.00410011	0.00502773	0.0144823
	0.588767																636	0.00739078	0.00161419	0.0194498	0.00277509	0.0361302	0.0108998	0.0286956	0.00597778	0.0176495	0.00403187	0.00490726	0.0143512
	0.423619																637	0.00783168	0.00149143	0.0194381	0.00281785	0.0350905	0.0108593	0.0286168	0.00582444	0.0174041	0.00401523	0.00491657	0.0139136
	1.86828																638	0.00810414	0.00148212	0.0195457	0.002914	0.0334533	0.0109004	0.0279732	0.00561708	0.017214	0.0039551	0.00478482	0.0138457
	1.72221																639	0.00855091	0.00151615	0.0195432	0.00301521	0.0324169	0.0108775	0.0278381	0.00549317	0.0169705	0.00389299	0.00478214	0.0134395
	0.0993808																640	0.00884996	0.00163398	0.0196697	0.00314085	0.0308209	0.0107851	0.0271942	0.00536297	0.0167861	0.0038497	0.00464027	0.0133013
	0.31599																641	0.00929693	0.00168568	0.0196791	0.00328208	0.02983	0.0107757	0.0270104	0.00519112	0.0165462	0.00381619	0.00462642	0.012917
	0.428209																642	0.00962216	0.00159109	0.0198245	0.00341116	0.0283154	0.0108751	0.0263708	0.0050943	0.016369	0.00382078	0.00447599	0.0128822
	0.738771																643	0.0100637	0.00167146	0.0198479	0.00355823	0.0274122	0.0108813	0.0261459	0.00495226	0.0161348	0.00379196	0.00445218	0.012536
	0.537663																644	0.0104143	0.00177306	0.020012	0.00374155	0.0260173	0.010841	0.0255147	0.00482575	0.0159664	0.00378448	0.00429505	0.0123933
																	645	0.0108451	0.00190177	0.0200511	0.00394011	0.0252413	0.0108608	0.0252562	0.00473552	0.0157399	0.0037873	0.00426287	0.0120764
																	646	0.0112196	0.00210525	0.0202339	0.00415372	0.0240002	0.0110177	0.0246368	0.00466172	0.0155823	0.00380051	0.00410113	0.0120738
																	647	0.0116345	0.00203808	0.02029	0.00436004	0.0233864	0.0110684	0.024352	0.00461736	0.0153658	0.00382478	0.00406243	0.0116565
																	648	0.0120311	0.00220061	0.0204915	0.00451094	0.0223273	0.0110684	0.023747	0.00453443	0.0152208	0.00379681	0.00389832	0.0116565
																	649	0.0124256	0.00238257	0.0205652	0.00471097	0.0219044	0.0111636	0.0234428	0.00446493	0.0150164	0.0038462	0.00385512	0.0112751
																	650	0.0128418	0.00258354	0.0207854	0.00497407	0.0210487	0.0113259	0.0228545	0.00440821	0.0148861	0.00389108	0.00369088	0.0114468
																	651	0.0132119	0.00279778	0.0208769	0.00525095	0.0208381	0.0114627	0.0225371	0.00434406	0.0146958	0.00394623	0.00364524	0.011114
																	652	0.0136445	0.00280311	0.0211161	0.00554126	0.020199	0.01153	0.0219671	0.00436369	0.014582	0.00401146	0.00348306	0.0109606
																	653	0.0139869	0.00304087	0.0212252	0.00581491	0.0202144	0.0116447	0.0216423	0.00433068	0.0144075	0.00405975	0.00343699	0.0108232
																	654	0.0144323	0.00329644	0.0214836	0.00612899	0.0197977	0.0117241	0.0210918	0.00430856	0.014312	0.00414357	0.00327886	0.0107096
																	655	0.0147444	0.00356942	0.0216098	0.0064449	0.0200455	0.0120127	0.0207646	0.00429664	0.014155	0.00419753	0.00323422	0.0107805
																	656	0.0151983	0.00385945	0.0218878	0.00672606	0.0198498	0.0120959	0.0202347	0.0042943	0.0140791	0.00432238	0.00308188	0.0107137
																	657	0.0154784	0.00383888	0.0220304	0.00703778	0.0203296	0.0122774	0.0199093	0.0042873	0.0139408	0.00439935	0.00304034	0.0105868
																	658	0.015936	0.0041661	0.0223283	0.00730511	0.0203476	0.012371	0.0194006	0.00430084	0.0138857	0.00442704	0.00289524	0.0105599
																	659	0.0161834	0.00448903	0.0224866	0.00767045	0.0210536	0.0126993	0.019081	0.00431567	0.013767	0.00454542	0.00285818	0.0106607
																	660	0.0166394	0.00482779	0.0228049	0.00800326	0.0212729	0.012792	0.018594	0.0043381	0.0137336	0.00463487	0.00272146	0.010677
																	661	0.0168539	0.00484358	0.0229781	0.00838761	0.0221951	0.0130381	0.0182833	0.00440342	0.0136352	0.00476587	0.00269	0.0105662
																	662	0.0173027	0.00518377	0.0233171	0.00873887	0.0226	0.0134153	0.0178185	0.00436663	0.0136238	0.0048732	0.00256249	0.0105195
																	663	0.017485	0.0055589	0.0235046	0.00913992	0.0237256	0.0134952	0.0175196	0.00440356	0.0135459	0.00501732	0.00253746	0.0107489
																	664	0.0179205	0.00593499	0.0238644	0.00948246	0.0242981	0.0138949	0.0170773	0.00444512	0.0135566	0.00518635	0.00241968	0.0107513
																	665	0.0180721	0.00633277	0.0240658	0.00989909	0.0256122	0.0138949	0.0167927	0.00449204	0.0134995	0.0053404	0.00240167	0.0107513
																	666	0.0184881	0.00637854	0.024446	0.0102598	0.0263334	0.0143258	0.0163732	0.00457724	0.013532	0.00539797	0.00229388	0.0108003
																	667	0.0186107	0.00679763	0.0246613	0.0106895	0.0278207	0.0144308	0.016105	0.00463272	0.0134953	0.00555854	0.00228324	0.0109562
																	668	0.019001	0.00720102	0.0250612	0.0111264	0.0286715	0.0148083	0.0157089	0.00460244	0.013549	0.00572304	0.00218547	0.0111235
																	669	0.0190969	0.00764414	0.0252906	0.0114746	0.0303166	0.0148918	0.0154592	0.00466228	0.0135324	0.00578865	0.00218236	0.0110799
																	670	0.019455	0.00805324	0.0257087	0.0119246	0.0312785	0.0152731	0.0150868	0.00472164	0.0136063	0.00595961	0.00209445	0.0112603
																	671	0.0195267	0.00813045	0.0259527	0.0122531	0.0330666	0.0153679	0.0148574	0.00481986	0.0136092	0.00611509	0.00209887	0.0114678
																	672	0.0198466	0.00859767	0.0263869	0.012694	0.0341223	0.0157336	0.0145094	0.00488758	0.0137018	0.00620788	0.00202052	0.0116571
																	673	0.0198964	0.00907497	0.0266462	0.0131586	0.0360398	0.0158493	0.0143024	0.00495725	0.0137235	0.00638263	0.00203236	0.0116695
																	674	0.020172	0.00952579	0.0270937	0.0135932	0.0371733	0.0162102	0.0139792	0.00492772	0.013833	0.00658559	0.00196315	0.0118715
																	675	0.0202023	0.0100191	0.0273693	0.0140674	0.0392079	0.0162886	0.0137966	0.0049985	0.0138726	0.00676259	0.00198219	0.0121141
																	676	0.020428	0.0100563	0.0278265	0.0144868	0.0404048	0.0166253	0.0134991	0.00510086	0.0139968	0.00691444	0.00192165	0.0123212
																	677	0.0204407	0.0105584	0.0281195	0.0149683	0.0425455	0.0166866	0.0133431	0.00517409	0.0140532	0.00709247	0.00194762	0.0125706
																	678	0.0206116	0.0110664	0.0285819	0.0153548	0.0437933	0.017091	0.0130717	0.00524779	0.0141897	0.00718364	0.00189522	0.012601
																	679	0.0206082	0.0115792	0.0288935	0.0157518	0.0460304	0.0175499	0.0129451	0.0053217	0.0142615	0.00726787	0.00192782	0.0129139
																	680	0.0207199	0.0120521	0.029356	0.0161815	0.0473183	0.0174415	0.0127004	0.00528849	0.0144074	0.00742141	0.001883	0.0130822
																	681	0.0207013	0.0121995	0.0296876	0.0166755	0.0496436	0.0178753	0.0126059	0.0053963	0.0144932	0.00759681	0.00192191	0.0134144
																	682	0.0207503	0.0126137	0.0301447	0.0171721	0.0509622	0.0178753	0.0123885	0.00546893	0.0146455	0.0077705	0.00188412	0.0134144
																	683	0.0207169	0.0131323	0.0304973	0.0176709	0.0533688	0.0182917	0.0123295	0.00554173	0.0147436	0.00794214	0.00192899	0.0137741
																	684	0.0207008	0.0136499	0.0309431	0.0181518	0.0547102	0.018322	0.0121394	0.00561374	0.0148987	0.00802326	0.0018977	0.014039
																	685	0.0206525	0.0141148	0.0313179	0.0185066	0.0571921	0.0185335	0.0121198	0.00557566	0.0150073	0.00816494	0.00194821	0.0142769
																	686	0.0205699	0.0142908	0.0317462	0.019009	0.0585499	0.018709	0.0119569	0.00568261	0.0151618	0.00832897	0.0019229	0.014423
																	687	0.0205058	0.0148058	0.0321441	0.0194729	0.0611023	0.0188922	0.0119808	0.00575162	0.015279	0.00851584	0.00197872	0.0146699
																	688	0.0203569	0.0151785	0.0325489	0.0199762	0.062471	0.0189013	0.0118446	0.00582284	0.0154292	0.00867331	0.0019589	0.0149156
																	689	0.0202757	0.015674	0.0329705	0.0203951	0.0650898	0.0190493	0.0119168	0.00588976	0.0155528	0.00872959	0.00201973	0.0151554
																	690	0.020062	0.0161591	0.0333459	0.020821	0.0664651	0.0192227	0.0118063	0.005955	0.015695	0.00882279	0.00200496	0.0153216
																	691	0.0199623	0.0163019	0.0337919	0.0213252	0.0691471	0.0193406	0.0119319	0.00594976	0.0158228	0.00897569	0.00207051	0.0155685
																	692	0.0196867	0.0167782	0.0341323	0.021828	0.0705252	0.0193331	0.0118454	0.00601259	0.0159534	0.0091249	0.00206037	0.0157829
																	693	0.0195666	0.0172396	0.0346027	0.0222453	0.0732677	0.0194201	0.0120296	0.00607353	0.0160832	0.0092491	0.00213036	0.0160198
																	694	0.0192338	0.0175337	0.0349031	0.0226784	0.0746457	0.0198156	0.0119649	0.00614018	0.0161988	0.00938322	0.00212447	0.0164329
																	695	0.0190916	0.0179584	0.0353978	0.0231608	0.0774464	0.0196404	0.0122132	0.00619805	0.0163282	0.0094408	0.00219864	0.0164408
																	696	0.0187074	0.0181783	0.0356538	0.023655	0.0788218	0.0198232	0.0121673	0.0062948	0.0164258	0.00957548	0.00219666	0.0168696
																	697	0.0185417	0.0185173	0.0361723	0.0241454	0.0816789	0.019656	0.0124852	0.00624524	0.0165525	0.00970613	0.00227477	0.0168441
																	698	0.0181133	0.0189012	0.0363802	0.0246314	0.0830494	0.0199674	0.0124545	0.0062985	0.0166291	0.00983268	0.00227638	0.0173035
																	699	0.017923	0.0192616	0.0369217	0.0250497	0.0859612	0.0198065	0.0128471	0.00634986	0.0167509	0.00995677	0.0023582	0.0172613
																	700	0.0174584	0.0193355	0.0370785	0.0253444	0.0873246	0.0199194	0.0128274	0.00645034	0.0168044	0.0100346	0.00236312	0.0176809
																	701	0.0172431	0.0196725	0.0376417	0.0258091	0.0902898	0.019893	0.0132992	0.00649783	0.0169191	0.0100797	0.00244843	0.017789
																	702	0.016751	0.019983	0.0377452	0.0262766	0.091644	0.0198616	0.0132858	0.00654301	0.0169476	0.010194	0.00245639	0.0180092
																	703	0.0165112	0.0201846	0.0383284	0.0266784	0.0946611	0.0199636	0.0138408	0.00649154	0.0170531	0.0103113	0.00254497	0.0181892
																	704	0.0160006	0.0204358	0.0383774	0.0271316	0.0960038	0.0199115	0.0138285	0.00653471	0.0170553	0.0104193	0.00255575	0.0184092
																	705	0.0157375	0.0206681	0.0389786	0.0275756	0.0990711	0.0198891	0.0144696	0.00661501	0.0171498	0.0105232	0.00264738	0.0184636
																	706	0.0152172	0.0208892	0.0389724	0.0280095	0.1004	0.0198321	0.0144529	0.00665323	0.0171249	0.0106232	0.00266074	0.0186674
																	707	0.0149329	0.0209355	0.0395891	0.0283576	0.103515	0.0199005	0.015182	0.00670079	0.0172068	0.010612	0.0027552	0.0188372
																	708	0.0144112	0.0210976	0.0395278	0.0287231	0.104827	0.0198275	0.0151555	0.0067343	0.0171546	0.0107186	0.00277093	0.0190386
																	709	0.0141089	0.0211364	0.0401573	0.0291276	0.107989	0.019815	0.0159732	0.00668576	0.0172224	0.0108088	0.00286801	0.0190382
																	710	0.0135934	0.0213657	0.0400417	0.0295187	0.109279	0.0197444	0.0159311	0.00675367	0.0171431	0.0108953	0.00288588	0.019223
																	711	0.0132769	0.0214617	0.0406808	0.029871	0.112485	0.0197244	0.016837	0.0067823	0.0171957	0.0109822	0.00298534	0.0197442
																	712	0.0127742	0.0215267	0.0405125	0.0301957	0.113749	0.0196946	0.0167738	0.00680825	0.0170901	0.0110843	0.00300514	0.0195568
																	713	0.0124478	0.0214364	0.0411576	0.0305563	0.116995	0.0196171	0.017766	0.00684226	0.0171265	0.0111132	0.00310673	0.0198745
																	714	0.0119634	0.0213453	0.0409385	0.0307925	0.118229	0.0196222	0.0176762	0.0067997	0.0169958	0.01114	0.00312823	0.0196657
																	715	0.0116319	0.0215656	0.0415858	0.0311141	0.12151	0.0195136	0.0187517	0.00685196	0.0170152	0.0112125	0.00323166	0.020173
																	716	0.0111702	0.0215411	0.0413186	0.0314162	0.122706	0.0195365	0.0186302	0.00686944	0.016861	0.0112816	0.0032546	0.0199547
																	717	0.0108388	0.0214889	0.0419638	0.0316728	0.126017	0.0194272	0.0197847	0.00688369	0.0168631	0.0113744	0.00335958	0.0202227
																	718	0.010403	0.0214101	0.0416517	0.0319371	0.127168	0.0194463	0.0196266	0.00689468	0.0166874	0.0114387	0.00338369	0.0200954
																	719	0.0100768	0.0212067	0.0422905	0.0321988	0.130502	0.0192965	0.0208548	0.00690981	0.0166718	0.0114602	0.00348987	0.0204672
																	720	0.00966923	0.021306	0.0419367	0.0324191	0.131598	0.0193167	0.0206552	0.00690205	0.016477	0.0115207	0.00351484	0.0203184
																	721	0.00935326	0.0211783	0.0425644	0.0326146	0.134947	0.0192398	0.0219507	0.00690573	0.0164439	0.0115782	0.00362183	0.0204376
																	722	0.00897517	0.0210283	0.0421729	0.0327688	0.135978	0.0192787	0.0217054	0.00690535	0.0162326	0.0116232	0.0036473	0.020262
																	723	0.00867423	0.0208579	0.0427847	0.0329267	0.139329	0.0190904	0.0230607	0.0069008	0.0161822	0.0116764	0.00375466	0.0206222
																	724	0.00832632	0.0206685	0.0423596	0.0330869	0.140282	0.0191314	0.0227656	0.00689172	0.0159574	0.0116972	0.00378024	0.0204259
																	725	0.00804484	0.0207759	0.0429505	0.0331915	0.143624	0.0190688	0.0241723	0.00689655	0.0158902	0.0117469	0.00388747	0.0205156
																	726	0.00772722	0.0204619	0.0424961	0.033274	0.144485	0.0189082	0.0238239	0.00687796	0.015655	0.0118313	0.00391272	0.0206357
																	727	0.00746918	0.0202396	0.0430612	0.0332959	0.147801	0.0190803	0.0252726	0.00685916	0.0155718	0.0118639	0.00401923	0.0203694
																	728	0.00718158	0.0200034	0.042582	0.0333175	0.148554	0.0187376	0.0248676	0.00683516	0.0153297	0.011904	0.00404364	0.020723
																	729	0.00695044	0.0197545	0.0431163	0.0333166	0.151826	0.0189237	0.026348	0.00680565	0.0152316	0.0118687	0.0041488	0.0204555
																	730	0.00669236	0.0199037	0.0426168	0.0333235	0.152452	0.0187586	0.025884	0.00677751	0.0149863	0.0118874	0.0041718	0.0205079
																	731	0.00649104	0.0195925	0.0431155	0.033285	0.155659	0.0189702	0.0273852	0.00673175	0.0148745	0.0119632	0.00427488	0.0202401
																	732	0.00626187	0.019225	0.0426004	0.0332539	0.156138	0.0185877	0.0268603	0.00672934	0.0146299	0.012027	0.00429585	0.0205252
																	733	0.00609272	0.0189469	0.0430587	0.0331334	0.159255	0.0188108	0.0283704	0.00668216	0.0145061	0.0120547	0.00439605	0.0202585
																	734	0.00589184	0.0186614	0.0425327	0.03298	0.159566	0.0186471	0.0277838	0.0066287	0.0142664	0.0120786	0.00441431	0.0202413
																	735	0.00575663	0.018773	0.0429463	0.0327938	0.162565	0.0187497	0.0292905	0.00656771	0.0141326	0.0120986	0.00451074	0.0199299
																	736	0.00558352	0.0184705	0.042414	0.0327186	0.162683	0.0184814	0.0286425	0.00649947	0.0139021	0.0120965	0.00452556	0.0201877
																	737	0.00548342	0.0180726	0.0427789	0.0324794	0.165533	0.0185891	0.0301332	0.00650268	0.0137606	0.0121147	0.00461727	0.01986
																	738	0.00533772	0.017771	0.0422447	0.0322079	0.165436	0.0185765	0.0294251	0.00643003	0.0135438	0.0121289	0.00462789	0.0198412
																	739	0.00527333	0.0174656	0.0425573	0.0319046	0.168103	0.0186971	0.0308871	0.00635095	0.0133973	0.0121388	0.00471387	0.019502
																	740	0.00515486	0.0175315	0.0420255	0.0316241	0.167767	0.0184209	0.0301217	0.00625658	0.0131991	0.0121573	0.00471952	0.0197177
																	741	0.00512622	0.0172105	0.0422831	0.0312654	0.170215	0.0185469	0.0315426	0.00616316	0.0130507	0.0121566	0.00479873	0.0193642
																	742	0.00503501	0.0168866	0.0417577	0.0309382	0.169615	0.0185479	0.030724	0.00606385	0.0128758	0.0121703	0.00479863	0.0193159
																	743	0.00504163	0.0165333	0.041958	0.0307022	0.171808	0.0184066	0.0320921	0.00607646	0.012729	0.0121391	0.00487003	0.0191251
																	744	0.00497793	0.0165602	0.0414429	0.0302666	0.170923	0.0184066	0.0312259	0.00595889	0.0125827	0.0121294	0.00486344	0.0191251
																	745	0.0050188	0.0162321	0.0415847	0.0298673	0.172824	0.0182726	0.0325304	0.00584865	0.0124413	0.0121603	0.00492603	0.0188988
																	746	0.00498308	0.0159025	0.0410831	0.0293817	0.171636	0.0185606	0.0316233	0.00573352	0.0123285	0.0121396	0.0049123	0.0186766
																	747	0.00505667	0.0155721	0.041166	0.0288722	0.173211	0.0184373	0.0328549	0.00561398	0.0121969	0.0121134	0.00496513	0.0184231
																	748	0.00504958	0.015241	0.040681	0.0284056	0.171705	0.0184373	0.0319148	0.00549055	0.0121226	0.0121218	0.00494373	0.0184231
																	749	0.0051539	0.015241	0.0407057	0.0279199	0.172923	0.0183243	0.0330658	0.00549055	0.0120055	0.0121326	0.00498599	0.0181364
																	750	0.00517626	0.0149099	0.04024	0.0274524	0.171092	0.0186132	0.0321014	0.00536381	0.0119745	0.012084	0.00495652	0.0179376
																	751	0.00530889	0.0145789	0.0402081	0.026867	0.17193	0.0185108	0.033166	0.0052344	0.0118767	0.0120446	0.0049876	0.0176278
																	752	0.00536162	0.0142487	0.0397638	0.0262659	0.169773	0.0186747	0.0321867	0.00510297	0.0118937	0.0119995	0.00494985	0.017238
																	753	0.0055197	0.0139196	0.0396781	0.0258244	0.170213	0.0184217	0.0331611	0.00497024	0.0118203	0.0119929	0.00496935	0.017288
																	754	0.0056038	0.0138228	0.0392569	0.0253021	0.167739	0.0185907	0.0321764	0.00481068	0.0118894	0.0119304	0.00492335	0.0168941
																	755	0.00578411	0.013592	0.0391213	0.0246662	0.167776	0.0186242	0.0330588	0.00483694	0.0118454	0.0118675	0.00493112	0.0167579
																	756	0.0059006	0.0132663	0.0387245	0.024022	0.165003	0.0187933	0.032078	0.0047038	0.0119702	0.0117993	0.00487714	0.0163715
																	757	0.00609956	0.0129431	0.0385438	0.0233714	0.164641	0.0185611	0.0328687	0.00457158	0.0119604	0.011726	0.00487334	0.016374
																	758	0.00624941	0.0126227	0.0381722	0.0228243	0.161596	0.0187347	0.0319009	0.00444104	0.0121438	0.01168	0.00481189	0.0159873
																	759	0.00646312	0.0124771	0.037952	0.0222827	0.160853	0.0187733	0.0326018	0.00428209	0.0121726	0.0117173	0.00479699	0.0158347
																	760	0.00664722	0.0121491	0.0376062	0.0216198	0.157573	0.0187382	0.0316552	0.00415609	0.0124162	0.0116378	0.00472884	0.0154167
																	761	0.00687153	0.0119925	0.037353	0.0209579	0.156479	0.0187382	0.03227	0.00418789	0.0124876	0.011554	0.0047036	0.0154167
																	762	0.0070906	0.0116836	0.0370332	0.0202988	0.153009	0.018722	0.0313519	0.0040667	0.0127922	0.0114662	0.0046297	0.0149804
																	763	0.00732114	0.0113796	0.0367538	0.0196979	0.151604	0.0189539	0.0318854	0.00394998	0.0129092	0.0114041	0.00459516	0.0148809
																	764	0.00757566	0.011194	0.0364598	0.0191462	0.147995	0.0189478	0.031002	0.00380392	0.013274	0.0112505	0.00451669	0.0144398
																	765	0.0078079	0.0108869	0.0361615	0.0186413	0.14633	0.0189478	0.0314601	0.00369718	0.0134387	0.0113045	0.0044741	0.0144398
																	766	0.00809811	0.010692	0.035893	0.0180004	0.142638	0.0189623	0.0306166	0.00376495	0.0138618	0.0112051	0.00439234	0.0139857
																	767	0.00832743	0.010501	0.0355831	0.0174297	0.140769	0.0191342	0.0310058	0.0036325	0.014075	0.0110706	0.00434314	0.0136487
																	768	0.0086532	0.0102209	0.0353397	0.0168541	0.137051	0.0191843	0.0302059	0.00353927	0.0145531	0.0109911	0.00425946	0.0134673
																	769	0.00887496	0.010006	0.0350253	0.0162471	0.13504	0.0191725	0.0305333	0.00341595	0.0148145	0.0108867	0.00420518	0.0131959
																	770	0.00923581	0.00972735	0.0348065	0.0156551	0.131354	0.0192294	0.0297795	0.00333653	0.0153428	0.0107817	0.00412094	0.0130071
																	771	0.0094454	0.00945696	0.0344944	0.0150977	0.129261	0.0193915	0.0300521	0.00326476	0.0156508	0.010786	0.00406316	0.0127066
																	772	0.00984041	0.00931326	0.0342996	0.0146495	0.12566	0.019441	0.0293462	0.00333586	0.0162235	0.0107698	0.00397971	0.0125228
																	773	0.0100334	0.00917617	0.0339959	0.0140974	0.123547	0.0194601	0.0295709	0.00323929	0.0165753	0.0106657	0.00391997	0.012257
																	774	0.0104612	0.00894237	0.0338246	0.0136398	0.120077	0.0195162	0.0289133	0.003145	0.0171857	0.0104755	0.00383856	0.0120679
																	775	0.0106333	0.0086989	0.0335347	0.0131238	0.118	0.0196138	0.0290969	0.00309724	0.0175776	0.0103716	0.00377831	0.0116139
																	776	0.011092	0.0084651	0.0333863	0.0126284	0.114704	0.0197109	0.0284873	0.00305764	0.0182181	0.0102702	0.00370007	0.0116287
																	777	0.0112395	0.00824125	0.0331147	0.0121629	0.112711	0.0198144	0.028636	0.00302618	0.0186453	0.0102869	0.00364064	0.0111897
																	778	0.0117267	0.00814673	0.0329887	0.0117014	0.109624	0.0198144	0.0280732	0.00309685	0.019308	0.0101882	0.00356654	0.0111897
																	779	0.011846	0.00802765	0.0327392	0.0113299	0.107757	0.0199401	0.0281929	0.0030028	0.0197654	0.0101667	0.0035091	0.0107569
																	780	0.0123588	0.00782456	0.0326351	0.0109681	0.104903	0.0199861	0.027675	0.00298741	0.0204425	0.0100754	0.00343995	0.0108049
																	781	0.012447	0.00763221	0.0324103	0.0105715	0.103198	0.0201157	0.0277709	0.00297986	0.0209244	0.00999157	0.00338549	0.0103916
																	782	0.012982	0.00745082	0.0323274	0.0101692	0.100595	0.0201157	0.0272956	0.00297998	0.021608	0.0100084	0.00332193	0.0103916
																	783	0.0130368	0.00720787	0.0321292	0.00981042	0.0990773	0.020266	0.0273723	0.00294835	0.0221086	0.00992918	0.00327126	0.00998927
																	784	0.0135902	0.00715102	0.0320672	0.00947558	0.0967368	0.0203764	0.0269368	0.00301504	0.0227915	0.00985567	0.00321376	0.00986033
																	785	0.0136098	0.00712168	0.0318967	0.00921052	0.0954244	0.0204105	0.0269982	0.00300237	0.0233052	0.00968863	0.00316752	0.00968951
																	786	0.0141773	0.00697426	0.0318547	0.00890796	0.0933502	0.0205454	0.0265994	0.00302415	0.0239808	0.00962231	0.00311641	0.00949586
																	787	0.0141609	0.00683844	0.0317124	0.00868715	0.0922551	0.0205818	0.0266489	0.00305264	0.0245021	0.00963279	0.00307506	0.00932543
																	788	0.0147377	0.00660322	0.0316899	0.00838532	0.0904459	0.020671	0.0262834	0.00304957	0.0251646	0.00965321	0.00303052	0.00925582
																	789	0.0146851	0.00648218	0.0315754	0.00815682	0.089574	0.0206902	0.0263237	0.00309109	0.0256885	0.00960503	0.00299437	0.0090955
																	790	0.0152664	0.0064737	0.0315716	0.00795243	0.0880238	0.0208587	0.0259881	0.00315044	0.026333	0.00956446	0.00295648	0.00893476
																	791	0.015178	0.00650156	0.0314847	0.00774173	0.0873758	0.0208777	0.0260215	0.00317542	0.0268547	0.00951936	0.00292573	0.00877602
																	792	0.0157586	0.00641298	0.0314987	0.00758064	0.0860751	0.0210803	0.0257122	0.00322779	0.0274772	0.0094929	0.00289445	0.0084769
																	793	0.0156358	0.00619251	0.0314384	0.007443	0.0856481	0.0209461	0.0257403	0.00324977	0.0279928	0.00947446	0.00286917	0.00861785
																	794	0.0162104	0.00612049	0.0314694	0.00732807	0.0845847	0.0212964	0.0254537	0.00331303	0.0285902	0.00958505	0.0028444	0.00819969
																	795	0.0160551	0.00614952	0.0314347	0.00720757	0.0843723	0.021145	0.0254779	0.00336434	0.0290961	0.00946477	0.00282459	0.0083477
																	796	0.0166185	0.00609878	0.0314816	0.00712479	0.0835323	0.0213558	0.0252104	0.00343001	0.0296662	0.00946297	0.00280616	0.00810038
																	797	0.0164332	0.00617705	0.0314717	0.00706457	0.0835261	0.0211713	0.0252316	0.00348626	0.0301593	0.00946917	0.00279174	0.00826094
																	798	0.0169802	0.00597741	0.0315335	0.00702659	0.0828943	0.0215769	0.02498	0.00352963	0.0307006	0.00948322	0.00277943	0.00787719
																	799	0.016768	0.00595366	0.0315473	0.00701048	0.0830842	0.0213765	0.0249988	0.00360982	0.0311786	0.00950503	0.00277026	0.0080432
																	800	0.0172937	0.00594162	0.0316229	0.00686452	0.0826446	0.0215906	0.0247597	0.00369354	0.0316901	0.00951824	0.00276382	0.00785015
																	801	0.0170579	0.00601392	0.0316597	0.00690665	0.0830197	0.0216253	0.0247766	0.00373276	0.0321509	0.00958928	0.00275973	0.00798379
																	802	0.0175578	0.00602122	0.0317478	0.00694551	0.0827563	0.0215681	0.0245471	0.00381714	0.0326325	0.00962381	0.0027589	0.0078617
																	803	0.0173019	0.00585109	0.0318071	0.00700501	0.0833048	0.0218471	0.0245624	0.00387722	0.0330745	0.00966548	0.00275969	0.00784185
																	804	0.017772	0.00597321	0.0319066	0.00708476	0.0832016	0.0217808	0.0243397	0.00396339	0.0335263	0.00971403	0.00276418	0.00772388
																	805	0.0174997	0.00600528	0.031988	0.00710518	0.0839117	0.0218057	0.0243536	0.00405878	0.0339484	0.00974162	0.00276962	0.00791061
																	806	0.0179363	0.00604749	0.0320975	0.00712081	0.083953	0.0217181	0.0241353	0.00415653	0.0343708	0.00970621	0.00277914	0.00779912
																	807	0.0176513	0.00615514	0.0322008	0.00727228	0.0848127	0.0222145	0.024148	0.00418222	0.0347722	0.00980745	0.002789	0.00752851
																	808	0.0180514	0.00601505	0.0323192	0.00743226	0.0849835	0.0219259	0.023932	0.0042579	0.0351658	0.00990484	0.00280325	0.00771627
																	809	0.0177571	0.00608048	0.0324444	0.0075043	0.0859809	0.0221339	0.0239437	0.00435861	0.0355459	0.00994772	0.00281729	0.00766034
																	810	0.0181185	0.00623038	0.0325704	0.00768287	0.0862665	0.021829	0.0237281	0.00446204	0.0359117	0.0100261	0.002836	0.00784881
																	811	0.017818	0.0063083	0.0327179	0.00787921	0.0873901	0.0223404	0.0237393	0.00456739	0.0362702	0.0101098	0.00285396	0.00763162
																	812	0.0181391	0.00639376	0.0328503	0.00799049	0.0877765	0.022029	0.0235228	0.00467426	0.036609	0.010158	0.00287683	0.00781952
																	813	0.017835	0.00632683	0.0330204	0.00822119	0.0890149	0.0222266	0.0235339	0.00467132	0.0369457	0.0102484	0.00289847	0.00781704
																	814	0.0181149	0.0064235	0.033158	0.00835722	0.0894886	0.0219061	0.0233152	0.00477862	0.0372585	0.0103086	0.00292522	0.00800205
																	815	0.0178095	0.00652632	0.0333513	0.00861636	0.0908309	0.0224199	0.0233269	0.00488724	0.0375735	0.0104075	0.00295028	0.00784135
																	816	0.0180481	0.0066884	0.033493	0.00887917	0.0913788	0.0220968	0.0231052	0.00500261	0.0378611	0.0104651	0.00298065	0.00802407
																	817	0.017743	0.00679702	0.0337102	0.009066	0.0928142	0.0222824	0.0231183	0.0051143	0.0381544	0.0105205	0.00300889	0.00807227
																	818	0.0179409	0.00674736	0.0338549	0.00924469	0.093424	0.0223199	0.0228931	0.00510805	0.0384178	0.0105917	0.00304259	0.00840428
																	819	0.0176373	0.00686401	0.0340967	0.00955876	0.0949419	0.0224613	0.0229085	0.00522004	0.0386896	0.0107038	0.00307374	0.00814649
																	820	0.0177955	0.00698372	0.0342434	0.00989001	0.0956014	0.0225043	0.0226796	0.005333	0.0389293	0.0108558	0.00311052	0.00849524
																	821	0.0174941	0.00710559	0.0345106	0.0102309	0.0971914	0.0223113	0.0226983	0.00544683	0.0391799	0.010975	0.00314433	0.00841455
																	822	0.0176144	0.00709591	0.0346583	0.0105852	0.0978888	0.0223635	0.0224655	0.00556882	0.0393967	0.0110976	0.00318391	0.00877414
																	823	0.0173153	0.00722339	0.0349517	0.0107081	0.0995404	0.0224751	0.0224888	0.0056866	0.0396263	0.0111117	0.00322012	0.00853484
																	824	0.0174	0.00735262	0.0350996	0.0110838	0.100264	0.0226282	0.0222522	0.00567692	0.0398207	0.0112356	0.00326223	0.00867943
																	825	0.017103	0.00747611	0.03542	0.0114715	0.101967	0.022324	0.0222812	0.00579307	0.0400294	0.0113626	0.00330058	0.0088317
																	826	0.0171546	0.00759841	0.0355672	0.0118705	0.102706	0.0224725	0.0220412	0.00590989	0.040202	0.0114925	0.00334493	0.0089938
																	827	0.0168593	0.00758606	0.0359153	0.0122566	0.104449	0.0221856	0.022077	0.00603459	0.0403901	0.0115989	0.00338514	0.0091336
																	828	0.0168808	0.0077308	0.0360613	0.0125176	0.105191	0.0226078	0.021834	0.00616377	0.0405412	0.0116937	0.00343146	0.00917832
																	829	0.0165864	0.00785293	0.0364377	0.0128573	0.106965	0.0223316	0.0218779	0.00628436	0.0407089	0.0117677	0.00347325	0.00931143
																	830	0.0165809	0.00795055	0.0365819	0.01328	0.107698	0.0224638	0.0216322	0.00626406	0.040839	0.011881	0.00352124	0.00951051
																	831	0.0162865	0.00806041	0.036987	0.0137232	0.109491	0.0222122	0.0216853	0.00638322	0.0409863	0.0120224	0.00356431	0.00962942
																	832	0.0162573	0.00807757	0.0371291	0.0140064	0.110205	0.0225807	0.0214373	0.00651828	0.0410958	0.012121	0.00361365	0.00972991
																	833	0.0159621	0.00818966	0.0375632	0.0144608	0.112005	0.0223431	0.0215006	0.00664042	0.0412228	0.0122664	0.0036577	0.00984136
																	834	0.0159124	0.00829993	0.0377029	0.0149072	0.112687	0.0224579	0.0212509	0.00677081	0.041312	0.0124432	0.00370807	0.0100723
																	835	0.0156157	0.00839795	0.0381663	0.0152988	0.114483	0.0225751	0.0213252	0.00689329	0.0414188	0.0125232	0.00375276	0.0104793
																	836	0.0155488	0.00844437	0.0383034	0.0157695	0.115121	0.0225549	0.0210741	0.00686481	0.0414881	0.0126736	0.0038038	0.010321
																	837	0.0152498	0.00848933	0.0387959	0.0160218	0.116901	0.022673	0.0211601	0.00700932	0.0415746	0.0127311	0.0038488	0.0107314
																	838	0.0151689	0.0085753	0.0389305	0.0164954	0.117483	0.0224608	0.0209079	0.00713298	0.0416245	0.0128845	0.00390015	0.0106667
																	839	0.0148671	0.0086535	0.039452	0.0169702	0.119232	0.0225359	0.021006	0.00725696	0.0416907	0.0130396	0.00394509	0.0109389
																	840	0.0147752	0.00871879	0.0395842	0.0174448	0.119745	0.0225359	0.020753	0.00738585	0.0417217	0.0131961	0.00399636	0.0109389
																	841	0.0144703	0.00877927	0.0401342	0.0178615	0.121451	0.0225892	0.0208636	0.00750946	0.0417675	0.0132839	0.00404086	0.0112244
																	842	0.0143703	0.00878548	0.0402643	0.0181595	0.121883	0.0224758	0.02061	0.00750563	0.0417802	0.0133956	0.00409163	0.0112816
																	843	0.0140623	0.00883878	0.040842	0.018631	0.123531	0.0225265	0.020733	0.00763023	0.0418056	0.0135555	0.00413529	0.0115711
																	844	0.0139569	0.00888336	0.0409704	0.0190978	0.123868	0.0225265	0.0204788	0.00775497	0.0418007	0.0137163	0.00418512	0.0115711
																	845	0.0136459	0.00891928	0.0415748	0.0195359	0.125444	0.0225532	0.0206141	0.00787977	0.0418055	0.0138072	0.00422753	0.0118706
																	846	0.0135376	0.00893632	0.0417021	0.0197757	0.125673	0.0225032	0.0203594	0.00800446	0.0417838	0.0138493	0.00427598	0.0119053
																	847	0.0132239	0.00894644	0.0423321	0.0202038	0.12716	0.0225268	0.0205064	0.0080046	0.041768	0.0140285	0.00431669	0.0122059
																	848	0.013115	0.00896505	0.0424587	0.0206214	0.127268	0.0225268	0.0202511	0.00812936	0.0417305	0.01422	0.00436328	0.0122059
																	849	0.0127993	0.00897516	0.0431127	0.0210524	0.128652	0.0225249	0.0204094	0.00825401	0.041694	0.0143823	0.00440188	0.0125128
																	850	0.0126918	0.00897712	0.0432395	0.021471	0.128625	0.0225414	0.0201534	0.00837846	0.0416416	0.0145444	0.00444613	0.012527
																	851	0.0123749	0.00897111	0.0439157	0.0217219	0.129888	0.0225357	0.0203219	0.00850265	0.0415847	0.0146604	0.00448216	0.0128322
																	852	0.0122707	0.00907945	0.0440432	0.022071	0.129715	0.0226981	0.020065	0.00866021	0.0415184	0.0146669	0.0045236	0.013178
																	853	0.0119535	0.00895759	0.0447395	0.0224548	0.130842	0.0225035	0.0202429	0.00862647	0.0414412	0.0148257	0.00455663	0.0131403
																	854	0.0118543	0.00893686	0.0448684	0.0228214	0.13051	0.0226562	0.0199848	0.00874986	0.0413623	0.0149836	0.00459478	0.0134738
																	855	0.0115378	0.00890948	0.0455826	0.0230355	0.131483	0.022551	0.0201709	0.00887271	0.0412651	0.0150964	0.0046244	0.0134406
																	856	0.0114451	0.00887584	0.0457134	0.0233716	0.130981	0.0224879	0.0199115	0.00899493	0.0411749	0.0152523	0.00465881	0.0137438
																	857	0.0111304	0.00901368	0.0464429	0.0236874	0.131785	0.0224879	0.0201045	0.00915965	0.0410582	0.0154065	0.00468462	0.0137438
																	858	0.0110456	0.00896572	0.046576	0.0239642	0.131104	0.0223988	0.0198436	0.00926687	0.040958	0.0155503	0.00471486	0.0140447
																	859	0.010734	0.00879217	0.0473179	0.0242207	0.131723	0.0225709	0.0200421	0.00923705	0.0408225	0.0156107	0.00473652	0.0140229
																	860	0.0106582	0.00874328	0.0474538	0.0243547	0.130853	0.0224779	0.0197795	0.00935675	0.0407137	0.0157264	0.00476221	0.0143162
																	861	0.0103507	0.00889119	0.0482049	0.0245951	0.131274	0.0224779	0.0199821	0.00952004	0.0405602	0.0158736	0.00477942	0.0143162
																	862	0.0102851	0.00884111	0.0483435	0.0248108	0.130209	0.0223602	0.0197178	0.00963782	0.0404442	0.0160181	0.00480026	0.0146041
																	863	0.00998305	0.00878739	0.0491007	0.025001	0.130419	0.0225947	0.0199231	0.00975424	0.0402738	0.0161594	0.0048128	0.0145738
																	864	0.00992857	0.00872004	0.0492416	0.0251843	0.129154	0.0224739	0.0196571	0.00984654	0.0401521	0.0162295	0.00482854	0.0148529
																	865	0.009633	0.00851445	0.0500014	0.0252703	0.129143	0.0224739	0.0198636	0.00982394	0.0399663	0.0163283	0.00483625	0.0148529
																	866	0.00959052	0.00867143	0.0501441	0.0253816	0.127677	0.022331	0.019596	0.00998259	0.0398402	0.0163694	0.00484674	0.0151243
																	867	0.00930253	0.00861037	0.0509027	0.0254821	0.127437	0.0224748	0.0198025	0.0100943	0.0396405	0.0164988	0.00484959	0.0153235
																	868	0.00927282	0.00854804	0.0510462	0.0255555	0.12577	0.0224778	0.0195336	0.0102043	0.0395116	0.0166244	0.00485478	0.0153527
																	869	0.00899343	0.008485	0.0517999	0.025577	0.125296	0.0223036	0.0197387	0.0103124	0.0392999	0.016799	0.0048528	0.0155645
																	870	0.00897719	0.00826151	0.0519425	0.0256497	0.123433	0.0223142	0.019469	0.0102674	0.0391694	0.0168534	0.00485275	0.0156055
																	871	0.00870732	0.00842178	0.0526874	0.0256588	0.122725	0.0221344	0.0196716	0.0104186	0.038948	0.0169697	0.00484612	0.015848
																	872	0.00870516	0.00835892	0.0528272	0.0256413	0.120672	0.0224927	0.0194016	0.0105227	0.0388172	0.0170812	0.00484101	0.0158175
																	873	0.00844565	0.0082969	0.0535594	0.0255974	0.119731	0.0219408	0.0196008	0.0106248	0.0385885	0.0171881	0.00482999	0.0160797
																	874	0.0084581	0.00823621	0.0536937	0.0255358	0.1175	0.0223137	0.0193311	0.0107247	0.0384587	0.017173	0.00482011	0.0160516
																	875	0.00820971	0.00817725	0.0544093	0.0255117	0.116334	0.0221228	0.0195262	0.0108225	0.0382254	0.0172094	0.00480509	0.0162748
																	876	0.00823723	0.00817725	0.054535	0.0254092	0.113938	0.022522	0.0192579	0.0108225	0.0380977	0.017305	0.00479085	0.0162531
																	877	0.00800061	0.00812048	0.0552301	0.0252825	0.112557	0.0223336	0.0194481	0.0109179	0.0378628	0.0173957	0.00477232	0.0164697
																	878	0.00804359	0.00806622	0.0553435	0.0251864	0.110014	0.0223336	0.0191822	0.0110112	0.0377383	0.0174593	0.00475423	0.0164697
																	879	0.00781929	0.0080149	0.0560143	0.0250286	0.108433	0.0221379	0.0193673	0.0111022	0.0375051	0.0176351	0.00473278	0.016676
																	880	0.00787805	0.00796676	0.0561113	0.0248444	0.105763	0.0225692	0.0191051	0.0111909	0.0373846	0.0177124	0.00471145	0.0166682
																	881	0.00766654	0.00811135	0.0567542	0.024715	0.104001	0.0223777	0.0192849	0.0113175	0.0371566	0.0176673	0.00468774	0.0168704
																	882	0.00774133	0.00792218	0.0568303	0.0244945	0.101228	0.0223777	0.0190278	0.0112773	0.0370411	0.0177391	0.00466387	0.0168704
																	883	0.00754297	0.00788136	0.0574418	0.0243433	0.0993075	0.0221834	0.0192025	0.0113616	0.036822	0.0177892	0.00463862	0.0170633
																	884	0.00763395	0.00784461	0.0574921	0.0240933	0.0964558	0.0223326	0.018952	0.0114435	0.0367121	0.0178525	0.00461294	0.0170965
																	885	0.00744903	0.00781209	0.0580691	0.0238262	0.0944028	0.0224491	0.019122	0.0115234	0.0365056	0.0179109	0.00458693	0.0172658
																	886	0.0075563	0.0079399	0.0580887	0.0235431	0.0914999	0.0221374	0.0188796	0.0116378	0.0364021	0.0179644	0.00456025	0.0172655
																	887	0.00738501	0.00790684	0.0586282	0.0233452	0.0893424	0.0222622	0.0190457	0.0117126	0.0362123	0.0179342	0.00453427	0.0174501
																	888	0.00750856	0.00776069	0.058612	0.0231546	0.0864166	0.0220797	0.0188132	0.0116769	0.0361155	0.0179294	0.00450738	0.0176279
																	889	0.00735102	0.00774217	0.0591115	0.0228398	0.0841849	0.0225499	0.0189762	0.0117507	0.0359467	0.0179744	0.00448224	0.0176696
																	890	0.00749078	0.0077286	0.0590549	0.0225221	0.0812648	0.0219045	0.0187554	0.0118226	0.0358571	0.0180976	0.00445595	0.0177999
																	891	0.00734701	0.00783486	0.0595122	0.0221845	0.0789899	0.0223758	0.0189164	0.0119254	0.0357133	0.0181314	0.00443243	0.0178502
																	892	0.00750281	0.00782042	0.0594106	0.0219638	0.0761045	0.0222104	0.0187092	0.0119928	0.0356314	0.0181512	0.00440753	0.0180266
																	893	0.00737278	0.00781115	0.059824	0.0217147	0.0738178	0.022681	0.0188696	0.0120587	0.0355169	0.0181394	0.0043864	0.0180948
																	894	0.00754434	0.00771933	0.0596737	0.0213558	0.0709949	0.0220561	0.0186779	0.0120283	0.0354428	0.018163	0.00436365	0.0181993
																	895	0.00742794	0.00772708	0.0600421	0.0209967	0.0687274	0.0225248	0.0188392	0.0120939	0.0353619	0.0181655	0.00434562	0.0182769
																	896	0.00761489	0.00780838	0.0598399	0.0206252	0.0659937	0.0223809	0.0186649	0.0121863	0.0352959	0.0181833	0.00432572	0.0184568
																	897	0.00751193	0.00781517	0.0601625	0.0203855	0.0637752	0.0228426	0.0188287	0.0122482	0.0352528	0.0181902	0.00431146	0.0185534
																	898	0.00771381	0.0078277	0.0599061	0.0200068	0.0611556	0.022252	0.0186737	0.012309	0.0351951	0.0181992	0.00429505	0.0186352
																	899	0.00762402	0.0077736	0.0601831	0.0197324	0.0590142	0.0227084	0.018842	0.0123662	0.0351938	0.0181845	0.00428519	0.0187414
																	900	0.00784025	0.00784596	0.0598712	0.0193739	0.0565314	0.0225904	0.018708	0.012369	0.0351446	0.0182089	0.00427286	0.0189291
																	901	0.00776332	0.00787024	0.0601031	0.0191282	0.0544926	0.0227293	0.0188827	0.0124281	0.0351892	0.0181998	0.00426793	0.0189138
																	902	0.00799323	0.00790051	0.0597355	0.0187422	0.052167	0.0229255	0.0187715	0.0124865	0.0351484	0.0181909	0.00426019	0.0192519
																	903	0.00792874	0.00793707	0.0599236	0.0183644	0.050254	0.0226276	0.0189546	0.0125443	0.0352428	0.0181818	0.0042607	0.0190998
																	904	0.00817156	0.00797989	0.0595012	0.0179789	0.048103	0.0228364	0.0188678	0.0126017	0.0352106	0.0181657	0.00425799	0.0194505
																	905	0.00811904	0.00796635	0.0596473	0.0176994	0.0463358	0.0227687	0.0190613	0.0126923	0.0353582	0.0181493	0.00426436	0.0196508
																	906	0.00837389	0.00801543	0.0591721	0.0174557	0.0443742	0.0231735	0.0190004	0.0127504	0.0353347	0.0181246	0.00426706	0.0198131
																	907	0.00833279	0.0080852	0.0592789	0.0170741	0.0427698	0.0227236	0.0192062	0.0127155	0.0355389	0.0180985	0.00427967	0.0198534
																	908	0.00859871	0.00814796	0.0587537	0.0166957	0.0410095	0.0231167	0.0191726	0.0127719	0.035524	0.018067	0.00428808	0.0200245
																	909	0.0085684	0.00821751	0.0588243	0.016321	0.039582	0.0230834	0.0193925	0.0128284	0.0357877	0.0180303	0.00430725	0.0202383
																	910	0.00884434	0.00821833	0.058253	0.0160561	0.0380321	0.0234503	0.0193873	0.0128998	0.0357816	0.0180347	0.00432163	0.0204259
																	911	0.00882414	0.00827974	0.0582912	0.0158298	0.0367924	0.0230753	0.0196231	0.01298	0.0361073	0.0180162	0.00434763	0.0204551
																	912	0.00910898	0.0083635	0.0576783	0.0154652	0.0354594	0.0234277	0.0196472	0.0130369	0.0361101	0.0179677	0.00436816	0.0206504
																	913	0.0090981	0.00846899	0.0576883	0.0151062	0.0344154	0.023431	0.0199004	0.0129975	0.0364999	0.0179138	0.00440123	0.0208777
																	914	0.00939064	0.0085674	0.0570391	0.014774	0.0333033	0.0237525	0.0199543	0.0130541	0.0365117	0.0178225	0.00442807	0.0210873
																	915	0.00938824	0.00854376	0.0570254	0.014559	0.0324605	0.0234608	0.0202263	0.0131212	0.0369672	0.0177548	0.00446839	0.0211081
																	916	0.00968724	0.00864397	0.0563453	0.0142993	0.0315709	0.0237661	0.0203103	0.0131769	0.0369882	0.0177429	0.00450165	0.0213242
																	917	0.00969242	0.00877347	0.0563128	0.0139692	0.0309323	0.0238065	0.0206021	0.0132638	0.0375104	0.0177041	0.00454938	0.0215636
																	918	0.00999659	0.00889529	0.0556076	0.0136388	0.0302649	0.0238494	0.0207162	0.0133204	0.0375407	0.0176316	0.00458913	0.0215908
																	919	0.0100084	0.00903759	0.0555614	0.013316	0.0298312	0.0238751	0.0210285	0.0132815	0.0381303	0.017554	0.0046444	0.0218058
																	920	0.0103164	0.00899205	0.0548367	0.0131253	0.0293837	0.0239718	0.0211724	0.0133447	0.0381702	0.0174663	0.00469068	0.0220504
																	921	0.0103338	0.00912414	0.0547819	0.0128168	0.0291538	0.0242052	0.0215056	0.013401	0.0388272	0.0173785	0.00475359	0.0222877
																	922	0.0106443	0.00930846	0.0540434	0.0125795	0.0289225	0.0243114	0.0216784	0.01349	0.0388768	0.0173656	0.00480642	0.0225389
																	923	0.0106662	0.00946246	0.0539849	0.012283	0.0288935	0.0243114	0.0220327	0.0135463	0.0396006	0.0172712	0.00487705	0.0225389
																	924	0.010978	0.00962458	0.0532378	0.0121198	0.0288732	0.0244461	0.0222333	0.0136026	0.0396602	0.0172045	0.00493645	0.0227918
																	925	0.0110033	0.00957001	0.0531807	0.0118385	0.0290411	0.0246206	0.0226083	0.0135699	0.0404497	0.0171026	0.00501484	0.0230397
																	926	0.011315	0.00973525	0.0524298	0.011566	0.0292255	0.0247631	0.0228353	0.0136262	0.0405196	0.016997	0.0050808	0.0232966
																	927	0.0113427	0.00990893	0.0523787	0.0113232	0.0295849	0.0248969	0.0232304	0.0136823	0.0413733	0.0168696	0.00516699	0.023549
																	928	0.011653	0.0101606	0.0516281	0.0111059	0.0299666	0.0249327	0.0234819	0.0137697	0.0414536	0.0168659	0.00523949	0.0235541
																	929	0.0116818	0.0103556	0.0515875	0.0109661	0.0305111	0.0250461	0.0238961	0.0138249	0.0423695	0.0167478	0.00533349	0.023808
																	930	0.0119896	0.010276	0.050841	0.0107227	0.0310822	0.0252216	0.02417	0.0138785	0.0424603	0.0166347	0.00541251	0.024067
																	931	0.0120185	0.01048	0.0508147	0.0104883	0.0318045	0.0252935	0.024602	0.0138495	0.0434359	0.0165195	0.00551432	0.0243223
																	932	0.0123225	0.0106869	0.0500753	0.0102658	0.0325563	0.0254228	0.0248959	0.0139045	0.0435373	0.0164212	0.00559983	0.0243254
																	933	0.0123504	0.010902	0.050067	0.0100486	0.0334486	0.0254737	0.0253442	0.0139592	0.0445696	0.016302	0.00570941	0.0245808
																	934	0.0126497	0.0112172	0.0493372	0.00995694	0.0343718	0.0256785	0.0256555	0.014041	0.0446817	0.0162898	0.00580136	0.0248381
																	935	0.0126756	0.0111242	0.0493499	0.00975075	0.0354257	0.025549	0.0261182	0.0140896	0.0457673	0.0161697	0.00591867	0.0249018
																	936	0.0129691	0.0113563	0.0486314	0.00955321	0.0365108	0.025906	0.026444	0.014141	0.04589	0.0160492	0.00601702	0.0250936
																	937	0.012992	0.0115949	0.0486678	0.00936419	0.0377173	0.0261548	0.0269193	0.0141201	0.0470254	0.0159287	0.00614198	0.0253472
																	938	0.0132789	0.0118412	0.0479619	0.00928151	0.0389542	0.0261239	0.0272567	0.0141726	0.0471585	0.0157968	0.00624666	0.0255984
																	939	0.0132978	0.0120949	0.0480242	0.00910643	0.0403041	0.0263721	0.0277426	0.0142242	0.0483395	0.0158454	0.00637918	0.0258476
																	940	0.0135773	0.0120984	0.0473316	0.00895566	0.0416824	0.0263721	0.0280885	0.0142908	0.0484828	0.0157206	0.0064901	0.0258476
																	941	0.0135915	0.0123602	0.0474215	0.0087931	0.043166	0.0266377	0.0285828	0.0143392	0.0497052	0.0156036	0.00663007	0.0260937
																	942	0.0138628	0.0126289	0.0467425	0.00863833	0.0446753	0.0265486	0.0289343	0.0143867	0.0498582	0.015488	0.00674713	0.0263376
																	943	0.0138716	0.0128972	0.0468612	0.00857713	0.0462825	0.0268109	0.0294349	0.0143746	0.0511175	0.0153199	0.00689438	0.0265772
																	944	0.0141343	0.0127827	0.0461957	0.00843539	0.047912	0.0268109	0.029789	0.0144154	0.0512796	0.0152064	0.00701745	0.0265772
																	945	0.014137	0.0130609	0.046344	0.00827844	0.0496327	0.0270866	0.0302938	0.0144626	0.052571	0.0152074	0.00717181	0.0268129
																	946	0.0143905	0.0134722	0.0456917	0.00814879	0.0513712	0.0269434	0.0306477	0.0145242	0.0527415	0.0151489	0.00730071	0.0270467
																	947	0.0143867	0.0137645	0.0458699	0.00802457	0.0531947	0.0272131	0.0311547	0.0145681	0.0540601	0.0150408	0.00746195	0.0272741
																	948	0.0146308	0.0140619	0.0452301	0.00799253	0.0550309	0.0272131	0.0315057	0.0146113	0.0542381	0.0149196	0.00759647	0.0272741
																	949	0.01462	0.0139295	0.0454383	0.00787995	0.0569466	0.0274917	0.0320131	0.0145985	0.0555789	0.0148164	0.00776432	0.0274967
																	950	0.0148544	0.014229	0.0448103	0.00777355	0.0588689	0.0273007	0.0323584	0.0146419	0.0557633	0.0147162	0.00790421	0.027718
																	951	0.0148364	0.0146696	0.0450479	0.00763682	0.0608656	0.0275711	0.0328646	0.0146945	0.0571211	0.014718	0.00807836	0.027931
																	952	0.015061	0.014979	0.0444309	0.00762118	0.062862	0.027846	0.033202	0.0147346	0.0573107	0.014604	0.00822329	0.0281387
																	953	0.0150357	0.0152915	0.0446973	0.00751939	0.0649284	0.027846	0.0337052	0.0147739	0.0586802	0.0145188	0.00840337	0.0281387
																	954	0.0152503	0.0151647	0.0440904	0.00744954	0.0669869	0.0281226	0.0340325	0.0148025	0.0588737	0.0144301	0.00855295	0.0283408
																	955	0.0152178	0.0154641	0.0443844	0.00736677	0.0691113	0.0278796	0.0345316	0.0148058	0.0602496	0.0143426	0.00873852	0.0285426
																	956	0.0154226	0.0157796	0.0437868	0.00728894	0.0712192	0.0281447	0.0348467	0.0148443	0.0604453	0.0142582	0.0088923	0.0287337
																	957	0.0153827	0.0162414	0.0441072	0.00724663	0.0733898	0.0281447	0.0353404	0.0148858	0.0618222	0.0142421	0.00908286	0.0287337
																	958	0.0155778	0.0165604	0.0435182	0.00717549	0.0755342	0.0284076	0.0356416	0.0149212	0.0620184	0.0141607	0.00924028	0.0289191
																	959	0.0155309	0.0164299	0.0438631	0.00710882	0.0777389	0.0281358	0.0361288	0.0149458	0.0633911	0.0140825	0.00943525	0.0291047
																	960	0.0157165	0.0167483	0.0432821	0.00704636	0.0799066	0.0283865	0.0364144	0.0149793	0.0635859	0.0140074	0.00959569	0.0292785
																	961	0.0156629	0.0170506	0.0436499	0.0070576	0.0821328	0.0283865	0.0368943	0.0149883	0.0649489	0.0139711	0.00979439	0.0292785
																	962	0.0158393	0.0173674	0.0430763	0.00700136	0.0843103	0.028631	0.037163	0.0150218	0.0651404	0.013902	0.00995712	0.029446
																	963	0.0157792	0.0178302	0.0434648	0.00689999	0.0865453	0.0283406	0.0376347	0.0150534	0.0664885	0.0139027	0.0101588	0.0296148
																	964	0.0159467	0.0176989	0.0428983	0.00683935	0.0887189	0.0285729	0.0378851	0.0150745	0.0666744	0.0137933	0.010323	0.0297704
																	965	0.0158806	0.0180117	0.0433055	0.00679315	0.0909497	0.0285729	0.038348	0.0151044	0.0680023	0.0137304	0.0105268	0.0297704
																	966	0.0160398	0.0183217	0.0427457	0.00681608	0.0931054	0.0287959	0.0385791	0.0151334	0.0681803	0.0136519	0.0106915	0.0299199
																	967	0.0159681	0.0186119	0.0431693	0.00679005	0.0953186	0.0284798	0.0390325	0.0151462	0.069483	0.0136002	0.0108965	0.0299633
																	968	0.0161193	0.0189139	0.0426162	0.00674806	0.0974421	0.028709	0.0392432	0.0151749	0.0696507	0.0135976	0.0110606	0.0302084
																	969	0.0160426	0.0189296	0.0430539	0.0066638	0.0996245	0.0292065	0.0396866	0.0151888	0.0709233	0.0135973	0.0112657	0.0302004
																	970	0.0161864	0.0192261	0.0425073	0.00663058	0.101701	0.0289085	0.0398759	0.0152152	0.0710782	0.0135449	0.0114282	0.0303396
																	971	0.0161052	0.0195169	0.0429568	0.00665932	0.103839	0.0290948	0.0403088	0.0152406	0.0723158	0.0134773	0.0116322	0.0304647
																	972	0.0162421	0.019801	0.042417	0.00662924	0.105855	0.0288022	0.040476	0.0152652	0.0724551	0.0134301	0.0117918	0.0305919
																	973	0.0161569	0.0200635	0.042876	0.00660135	0.107935	0.0292658	0.0408978	0.0152796	0.0736534	0.0133855	0.0119935	0.0305838
																	974	0.0162875	0.0200781	0.0423428	0.00651959	0.109876	0.0289777	0.0410421	0.0152888	0.0737744	0.0133485	0.0121488	0.0307051
																	975	0.0161989	0.020347	0.0428092	0.00654739	0.111884	0.0291381	0.0414521	0.0153116	0.074929	0.0133364	0.0123469	0.0308121
																	976	0.0163237	0.0206075	0.0422829	0.00652481	0.113736	0.0288623	0.041573	0.0153334	0.0750288	0.0132965	0.0124964	0.0309214
																	977	0.0162323	0.0208586	0.0427547	0.00650406	0.115658	0.0290138	0.0419706	0.0153542	0.076136	0.0132589	0.0126895	0.0310166
																	978	0.016352	0.0210999	0.0422353	0.00648504	0.117407	0.0290138	0.0420674	0.0153741	0.0762116	0.0132235	0.0128318	0.0310166
																	979	0.0162583	0.0209808	0.0427105	0.00646767	0.119231	0.0291491	0.042452	0.0153812	0.0772677	0.0131901	0.0130183	0.0311061
																	980	0.0163735	0.0213305	0.0421981	0.00647119	0.120863	0.0289001	0.0425241	0.015393	0.077316	0.0131782	0.0131519	0.0311973
																	981	0.0162779	0.0215502	0.0426752	0.00645579	0.122575	0.0290286	0.0428949	0.015411	0.078318	0.0131473	0.0133303	0.0312752
																	982	0.0163891	0.0217578	0.0421697	0.00643841	0.124079	0.0290286	0.042942	0.0154279	0.0783359	0.0131556	0.0134536	0.0312752
																	983	0.0162922	0.0216639	0.0426472	0.00642582	0.125667	0.02914	0.0432982	0.0154381	0.079281	0.0131269	0.0136224	0.0313473
																	984	0.0164001	0.0218644	0.0421485	0.00645253	0.127029	0.0292329	0.0433198	0.0154534	0.0792655	0.0130878	0.0137339	0.0314142
																	985	0.0163021	0.022043	0.0426254	0.006431	0.128481	0.0290334	0.0436605	0.0154652	0.0801515	0.0130409	0.0138914	0.0314816
																	986	0.0164072	0.0223055	0.0421332	0.00639246	0.129692	0.0293073	0.0436564	0.0154725	0.0800992	0.0130396	0.0139898	0.0314755
																	987	0.0163087	0.0224609	0.0426085	0.00638454	0.130996	0.0291224	0.0439806	0.0154853	0.0809244	0.0130189	0.0141346	0.0315371
																	988	0.0164115	0.0223884	0.0421224	0.00637772	0.132045	0.0291925	0.0439508	0.0154929	0.0808322	0.0130001	0.0142183	0.0315873
																	989	0.0163127	0.0225359	0.0425958	0.00639888	0.133192	0.0290388	0.0442575	0.0155038	0.0815954	0.0129743	0.0143489	0.0316371
																	990	0.0164138	0.0226687	0.0421152	0.00638889	0.13407	0.0292439	0.0442018	0.0155137	0.0814601	0.0129825	0.0144168	0.0316323
																	991	0.0163149	0.0227814	0.0425863	0.00638229	0.135051	0.0291067	0.04449	0.0155215	0.0821606	0.0129678	0.0145319	0.0316761
																	992	0.0164146	0.0229371	0.0421105	0.00636055	0.135751	0.0291556	0.0444086	0.0155253	0.0819792	0.0129655	0.0145828	0.0317103
																	993	0.0163158	0.0228901	0.0425795	0.00635813	0.136557	0.0290532	0.0446772	0.0155301	0.0826167	0.0129527	0.0146812	0.0317423
																	994	0.0164147	0.0229781	0.0421077	0.00637491	0.137073	0.0291856	0.0445703	0.0155366	0.0823863	0.0129384	0.0147142	0.0317391
																	995	0.0163161	0.0230501	0.0425748	0.00636701	0.137698	0.0291013	0.0448184	0.0155419	0.0829612	0.0129221	0.014795	0.0317654
																	996	0.0164144	0.0231066	0.0421061	0.00636398	0.138025	0.0291301	0.0446863	0.015546	0.0826788	0.0129172	0.0148093	0.0317836
																	997	0.0163161	0.0231449	0.0425719	0.00636103	0.138464	0.0290828	0.0449129	0.0155488	0.083192	0.012921	0.0148717	0.0317983
																	998	0.0164141	0.0231468	0.0421053	0.00636106	0.1386	0.0291401	0.0447561	0.015549	0.0828551	0.0129178	0.0148669	0.0317968
																	999	0.016316	0.0231712	0.0425705	0.0063599	0.138848	0.0291117	0.0449602	0.0155507	0.0833077	0.0129151	0.0149103	0.0318055
																	1000	0.0164139	0.0231792	0.0421051	0.00635951	0.138792	0.0291211	0.0447794	0.0155514	0.0829139	0.0129142	0.0148862	0.0318081
