# Supplementary material for: Prefrontal-amygdalar oscillations related to social behavior in mice
Source: eLife. 2022 May 17;11:e78428. doi: 10.7554/eLife.78428 (PMC9113747; doi:10.7554/eLife.78428)
Supplement: Figure 6—source data 1. [file elife-78428-fig6-data1.xlsx]

## Sheet: main
Fig.6A	width	rate	Fig6C		FS approach	FS leaving		RS approach	RS leaving
	0.841142	2.97333		red	0.106283	0.107615	red	0.1	0.13
	0.907808	0.753333			0.15	0.13		0.1	0.11
	0.937437	3.64			0.15	0.15		0.13	0.13
	0.841142	1.62		black	0.05	0.12		0.22	0.11
	0.407776	11.1467			0.0689817	0.0905183		0.15	0.17
	0.641135	2.72			0.04	0.08	black	0.02	0.09
	0.558671	18.3333			0.08	0.09		0.01	0.05
	0.697652	7.09333			0.07	0.13		0.03	0.07
	0.764318	4.26667			0.02	0.15		0.02	0.05
	0.77038	5.6						0.03	0.09
	0.393536	25.28						0.09	0.02
	0.895105	17.56						0.04	0.04
	0.894214	4.23333						0.04	0.12
	0.944104	8.04667						0.04	0.06
	0.863259	2.32						0.05	0.06
	0.796402	1.02						0.04	0.1
	0.730954	1.87333						0.06	0.08
	0.832565	3.68667						0.04	0.07
	0.773128	3.38667						0.03	0.19
	0.735843	1.06667						0.07	0.1
	0.80341	3.82667						0.1	0.15
	0.807428	0.106667						0.08	0.09
	0.829984	5.72						0.07131	0.123318
	0.874458	0.173333						0.07	0.07
	0.69781	0.573333						0.07	0.05
	0.741159	2.75333						0.07	0.04
	0.90113	2.42667						0.08	0.21
	0.95836	1.57333						0.08	0.27
	0.940925	4.66667						0.08	0.13
	0.862459	2.78667						0.0854851	0.0863928
	0.89628	1.80667						0.09	0.05
	0.931319	2.7						0.14	0.2
	0.641144	3.18						0.1	0.14
	0.666818	17.8333						0.1	0.12
	0.761338	29.8933						0.16	0.15
	0.927828	0.493333						0.09	0.04
	0.904753	0.166667						0.1	0.1
	0.865878	2.13333						0.11	0.13
	0.881764	7.03333						0.13	0.18
	0.899805	2.08667						0.12	0.06
	0.840142	3.56						0.15	0.07
	0.873437	6.16667						0.1	0.1
	0.896176	0.08						0.11	0.04
	0.93767	0.506667						0.14	0.12
	0.566455	39.8133						0.13	0.03
	0.730586	6.53333						0.14	0.11
	0.808034	3.38						0.14	0.11
	0.904691	1.71333						0.18	0.13
	0.574748	12.3333
	0.631832	4.26
	0.766435	1.74667
	0.879326	1.80667
	0.933275	0.806667
	0.927131	0.56
	0.493522	16.18
	0.603182	5.35333
	0.805264	1.5
