# Supplementary material for: Prefrontal-amygdalar oscillations related to social behavior in mice
Source: eLife. 2022 May 17;11:e78428. doi: 10.7554/eLife.78428 (PMC9113747; doi:10.7554/eLife.78428)
Supplement: Figure 7—source data 1. [file elife-78428-fig7-data1.xlsx]

## Sheet: main
Fig7C	4Hz	10Hz	40Hz	4Hz	10Hz	40Hz	4Hz	10Hz	40Hz	4Hz	10Hz	40Hz	Fig7D	4Hz	10Hz	40Hz	4Hz	10Hz	40Hz	Fig7F	no stim	4Hz	10Hz	40Hz	no stim	4Hz	10Hz	40Hz	Fig7G	no stim	4Hz	10Hz	40Hz	no stim	4Hz	10Hz	40Hz
	178.017	65.7563	46.24	89.7946	114.303	125.272	100.07	97.801	82.1151	100.936	100.853	104.721		108.658	98.7018	105.769	83.3455	93.6027	100.201		0	3.79293	20.7435	9.57543	10.2988	8.11	16.8543	12.2815		33.4076	34.2458	5.8496	26.3333	55.0296	29.87	14.88	33.6
	101.16	94.3287	83.4753	102.504	110.832	216.853	95.6684	105.863	98.2882	98.2262	99.89	98.2578		94.4704	101.902	99.0747	103.352	97.4091	106.347		23.6486	26.6811	18.5827	29.4178	39.3645	51.5747	38.9129	39.7826		22.2222	5.85	32.7222	40.6111	19.9268	14.8783	29.17	19.9
	105.259	103.135	88.4152	105.047	107.573	101.445	106.54	105.058	86.5405	102.131	109.724	102.131		101.112	109.691	107.432	113.165	121.735	104.073		20.5624	14.7465	9.20703	33.8095	33.6769	19.234	31.9233	19.5643		31.333	41.3889	60.0874	44	48.2071	32.12	24.73	26.9671
	103.284	95.8592	97.5343	105.005	111.304	94.3385	95.648	97.0891	93.7845	114.181	105.805	104.093		96.3113	104.414	130.584	109.542	105.607	117.575		23.6486	3.17204	9.19067	30.0156	39.3645	60.9193	30.512	43.7685		36	58.1156	25.7576	43.9066	28.1212	23.3479	28.3449	22.1806
	128.661	93.8817	86.9643	117.043	104.512	105.639	104.535	106.407	100.935	109.514	97.2347	102.98									2.37691	1.5625	8.80802	5.58511	34.068	46.3612	43.292	26.1974
	107.636	107.035	87.1119	108.958	93.9504	105.943	94.6582	89.0354	98.2039	100.577	107.201	102.626									13.2653	19.688	18.9946	27.5681	60.6053	17.7959	21.239	43.7958
	122.498	98.6138	86.4033	108.279	105.453	110.474	98.751	105.184	95.048	108.686	105.529	105.048									31.7647	32.2734	37.8101	61.8755	30.387	21.4899	17.1634	17.3407
	109.869	92.1572	83.9004	115.099	110.29	138.391
